# Supplementary material for: Stereo- and regioselective hydroboration of 1-exo-methylene pyranoses: discovery of aryltriazolylmethyl C-galactopyranosides as selective galectin-1 inhibitors
Source: publisher site journal article supplement (doi:10.3762/bjoc.15.102), 2019-05-07

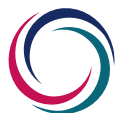

## Supporting Information

for

### **Stereo- and regioselective hydroboration of 1-exo-methylene pyranoses: discovery of aryltriazolylmethyl C-galactopyranosides as selective galectin-1 inhibitors**

Alexander Dahlqvist, Axel Furevi, Niklas Warlin, Hakon Leffler and Ulf J. Nilsson

*Beilstein J. Org. Chem.* **2019**, *15*, 1046–1060. [doi:10.3762/bjoc.15.102](https://doi.org/10.3762/bjoc.15.102)

**Copies of  $^1\text{H}$  NMR and  $^{13}\text{C}$  NMR spectra for compounds 1–10**

Compound **1a**:

$^1\text{H}$ :

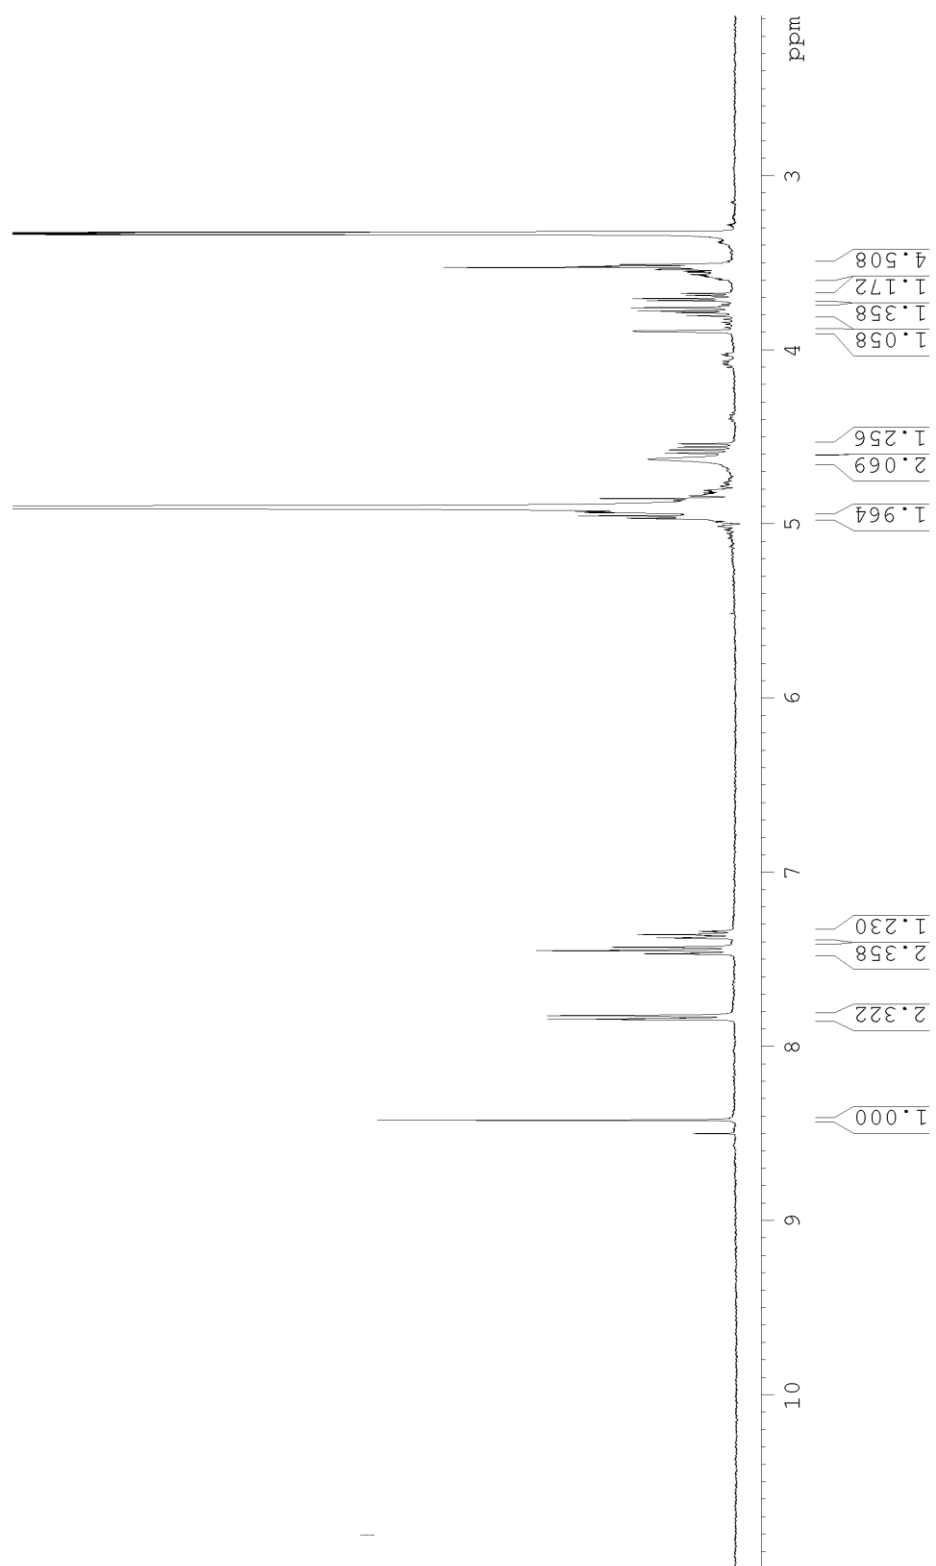

$^{13}\text{C}$ :

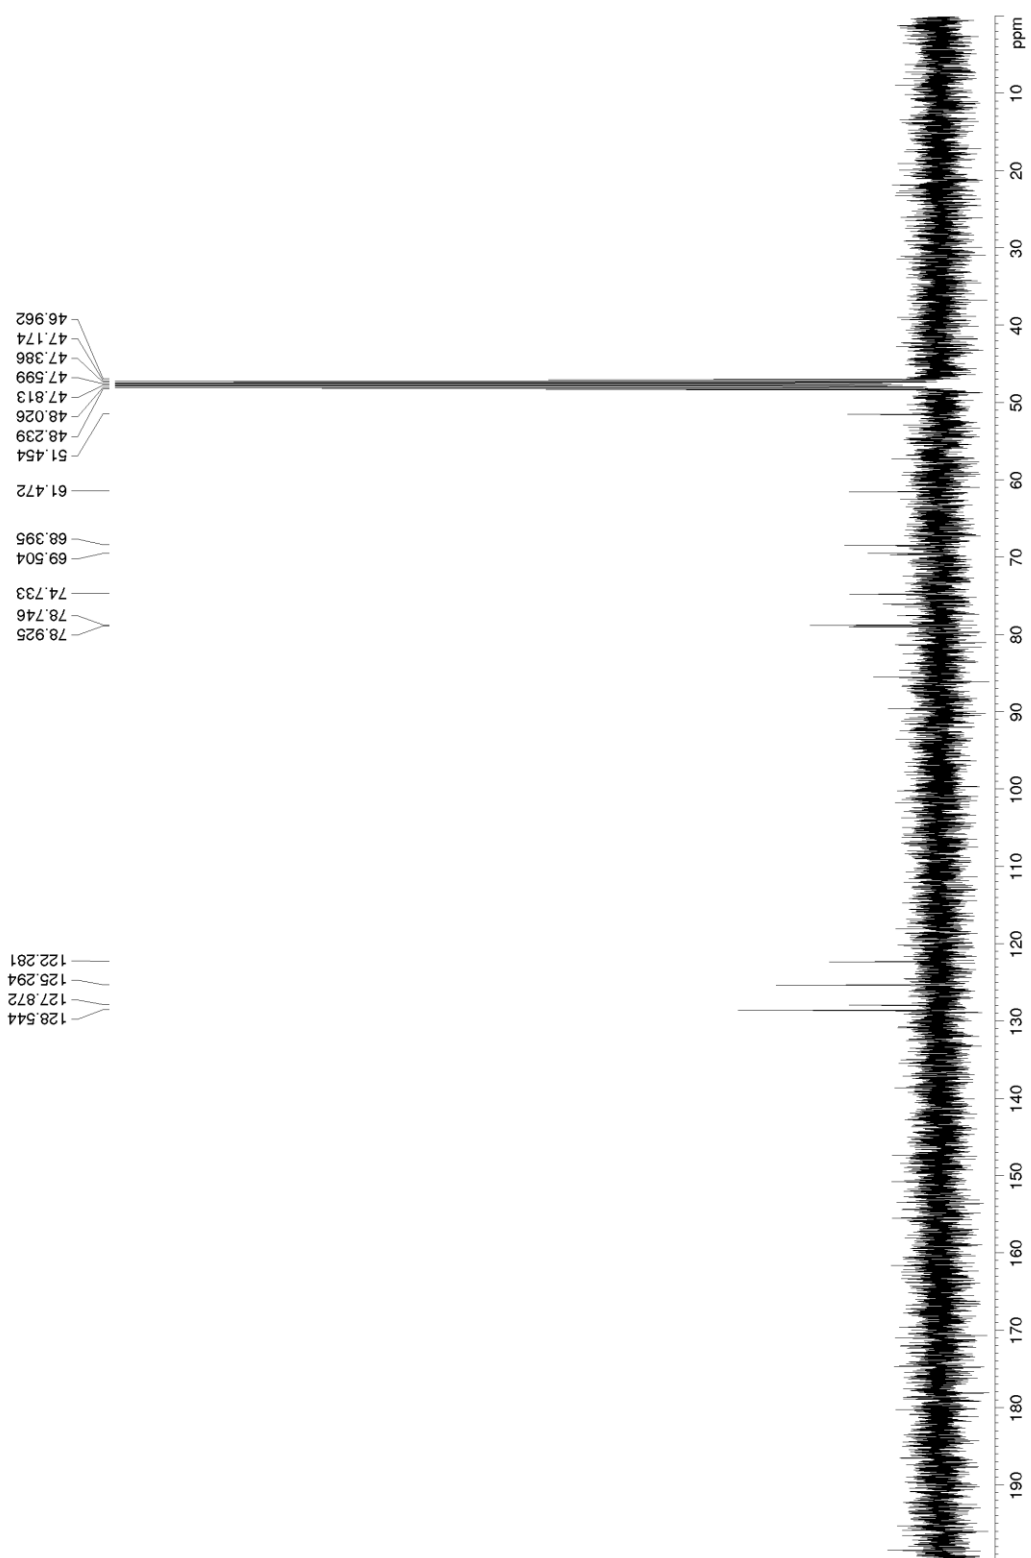

Compound **1b**:

$^1\text{H}$ :

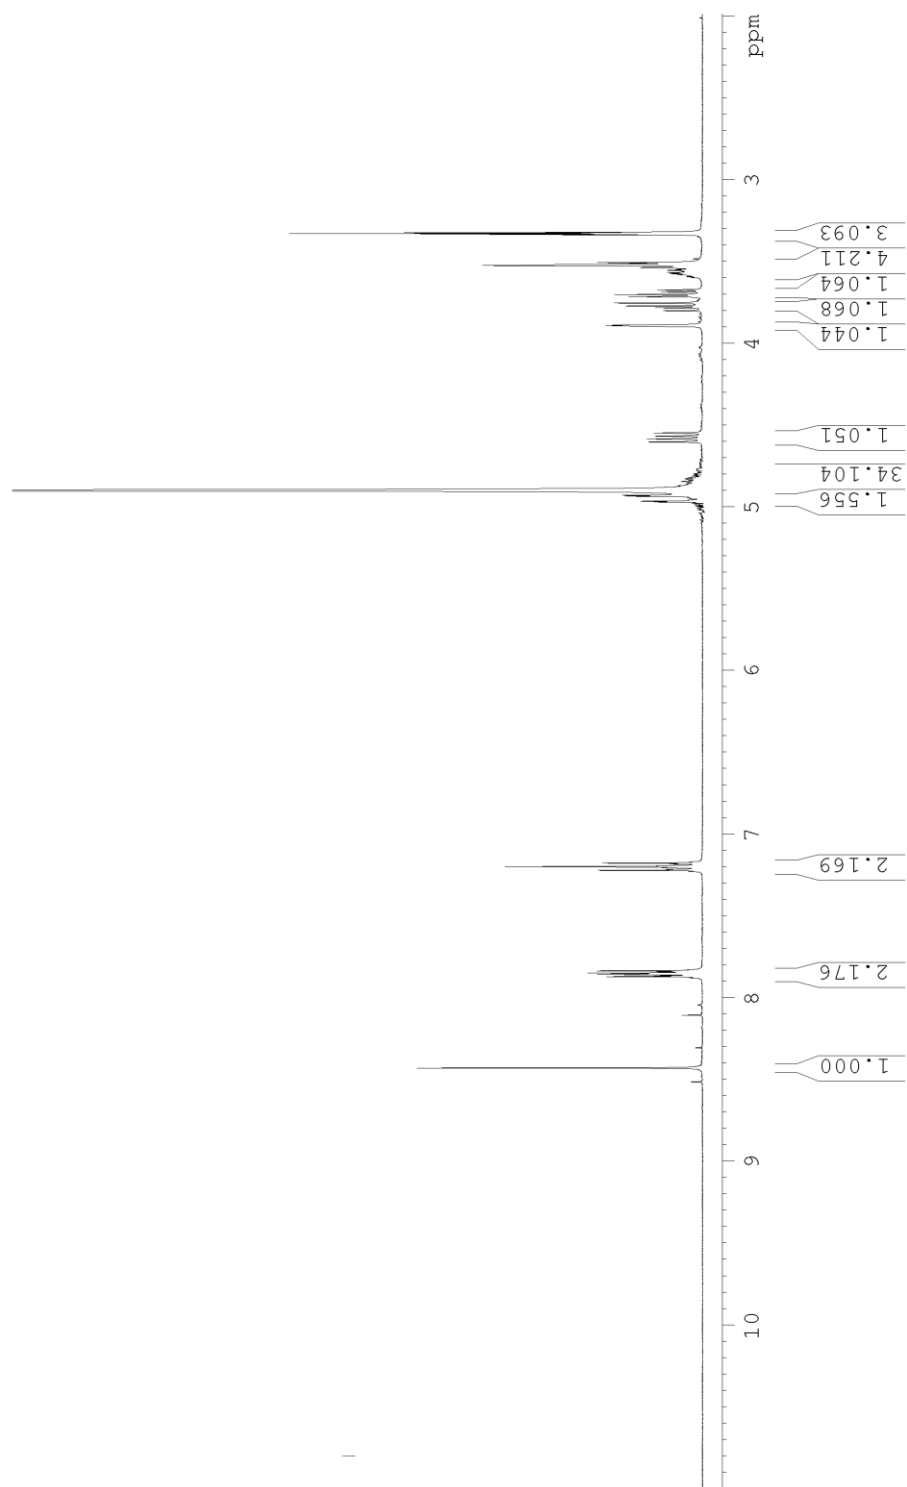

ppm

$^{13}\text{C}$ :

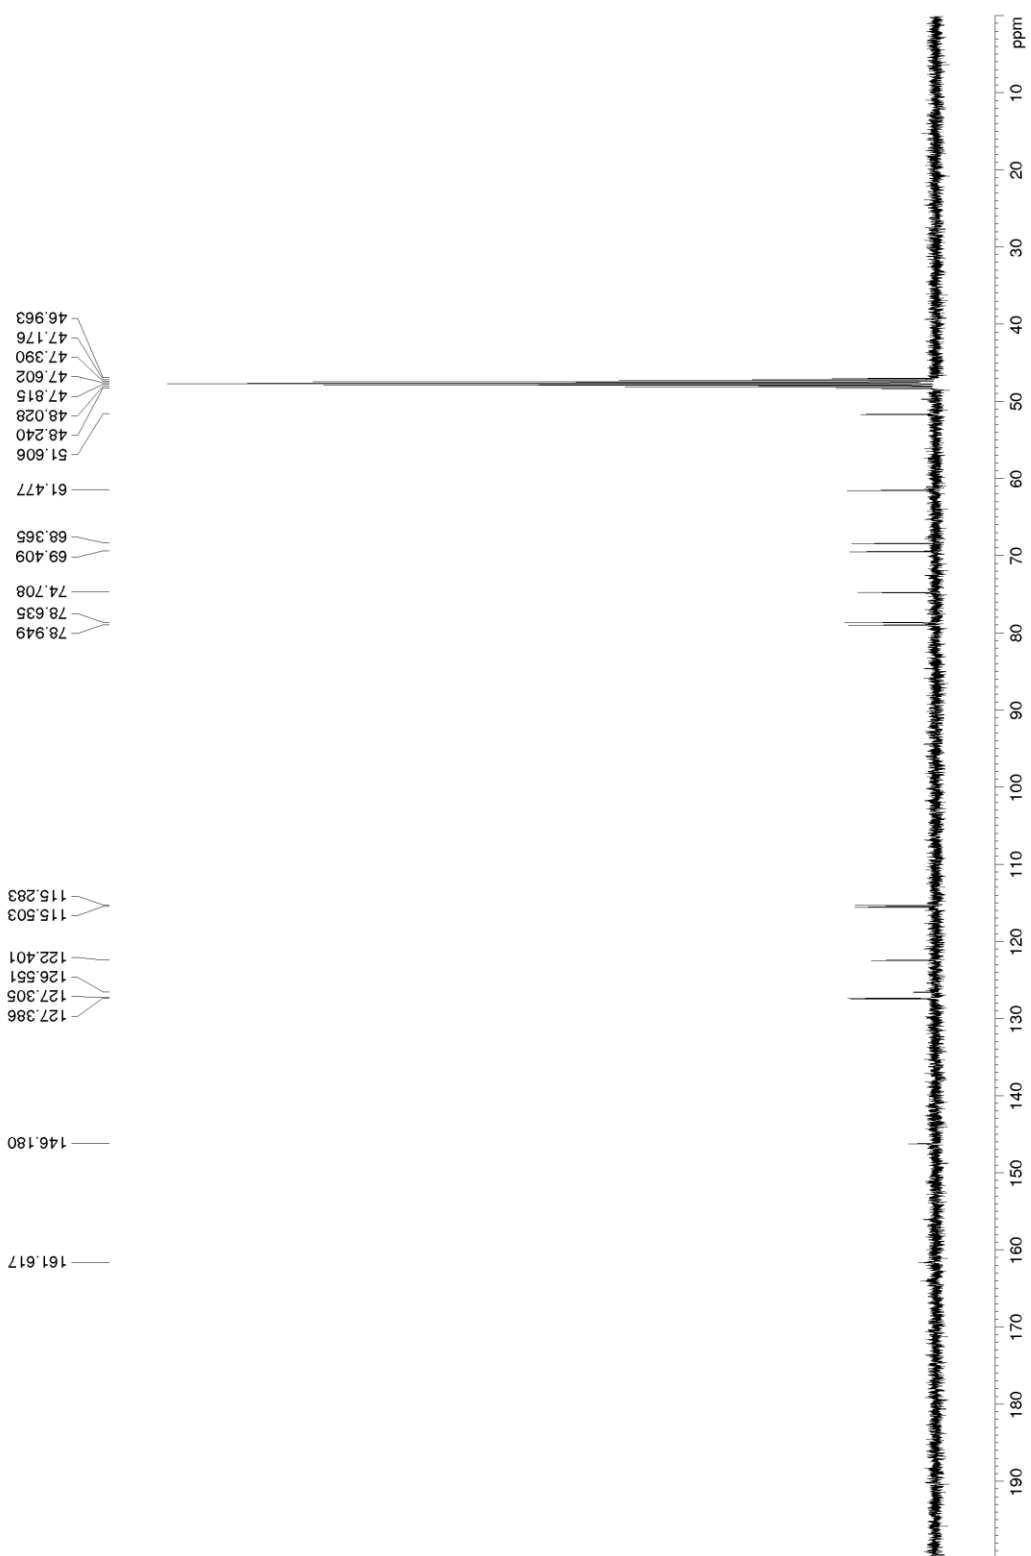

Compound **1c**:

$^1\text{H}$ :

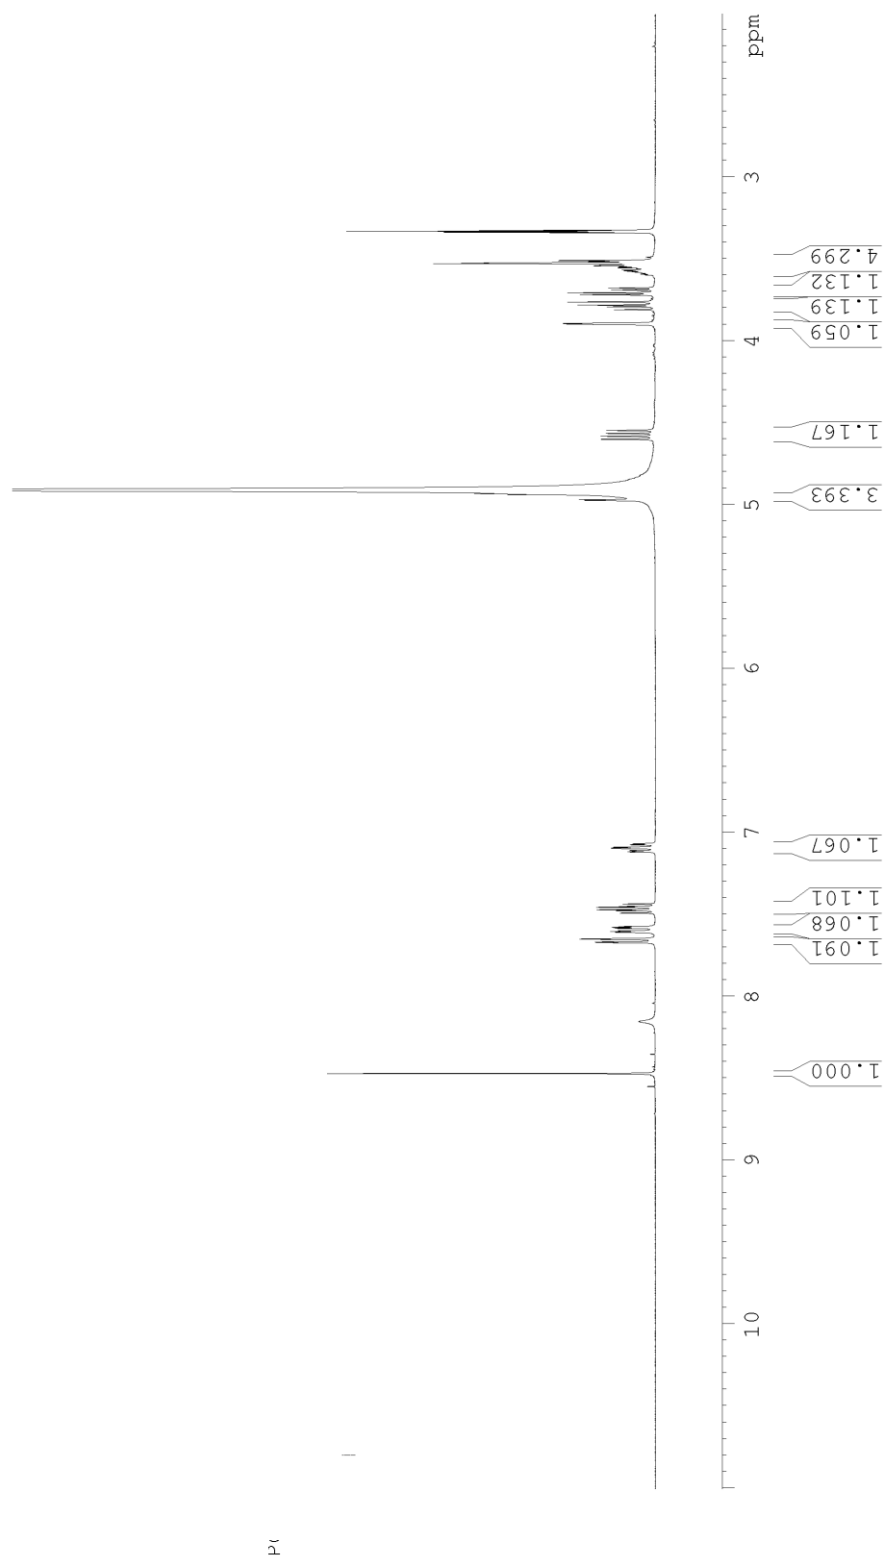

$^{13}\text{C}$ :

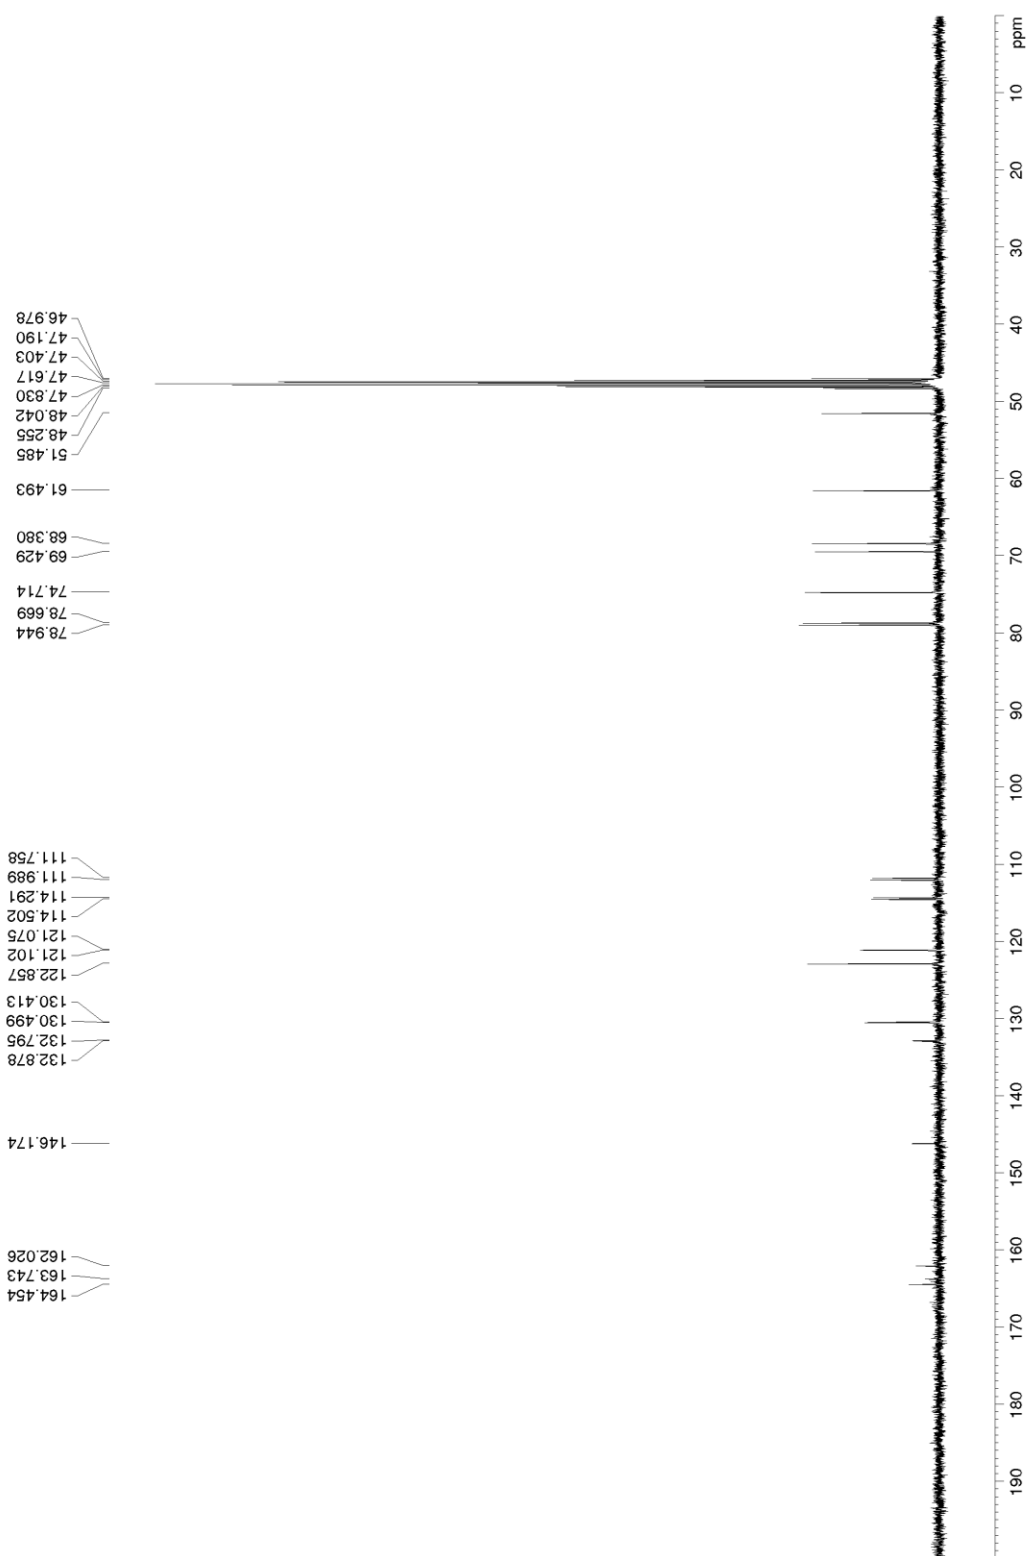

Compound **1d**:

$^1\text{H}$ :

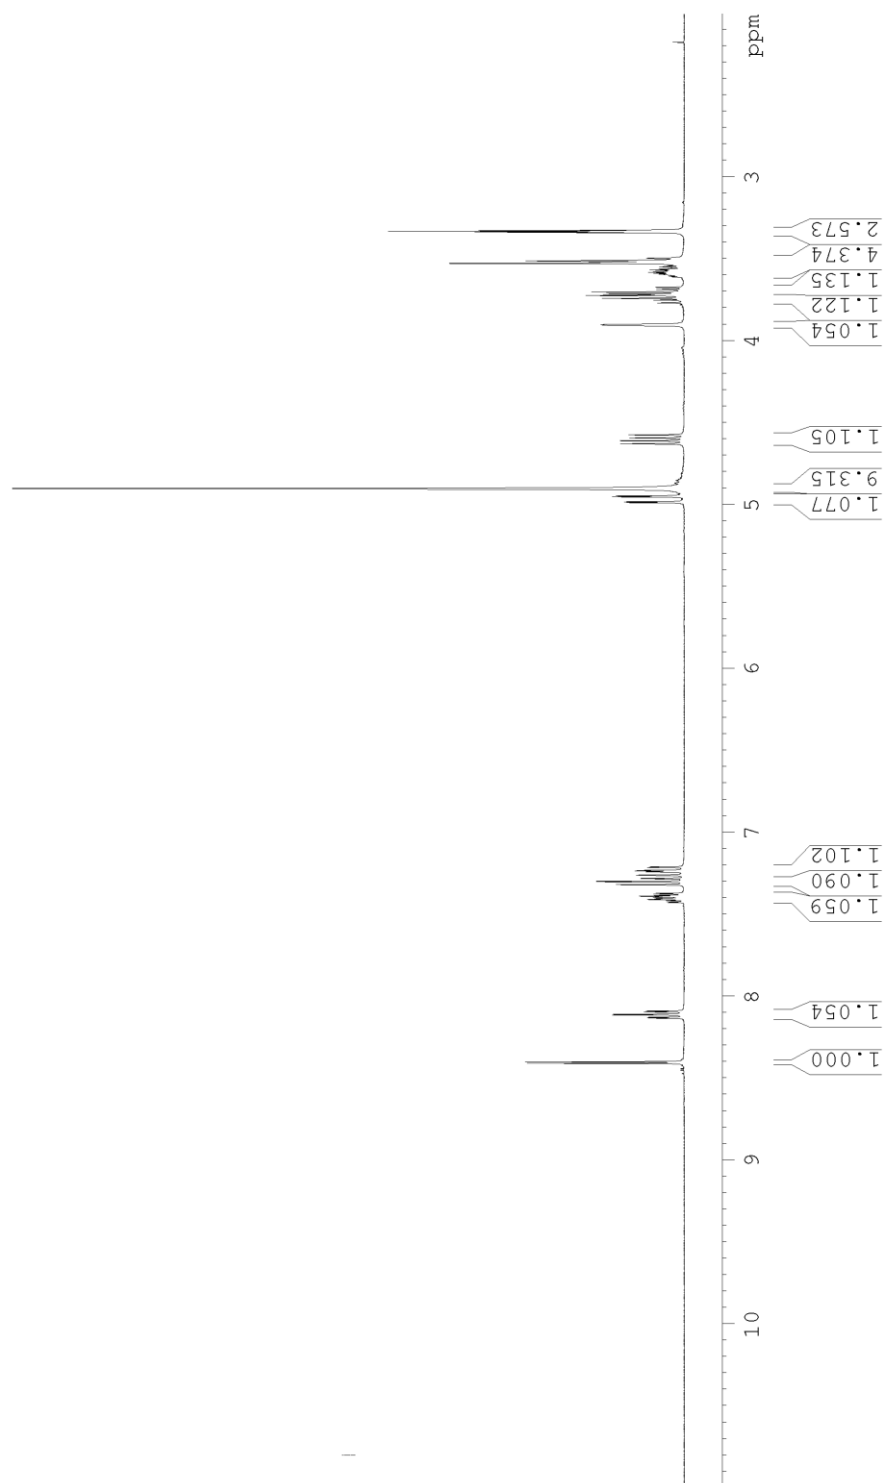

ppm



$^{13}\text{C}$ :

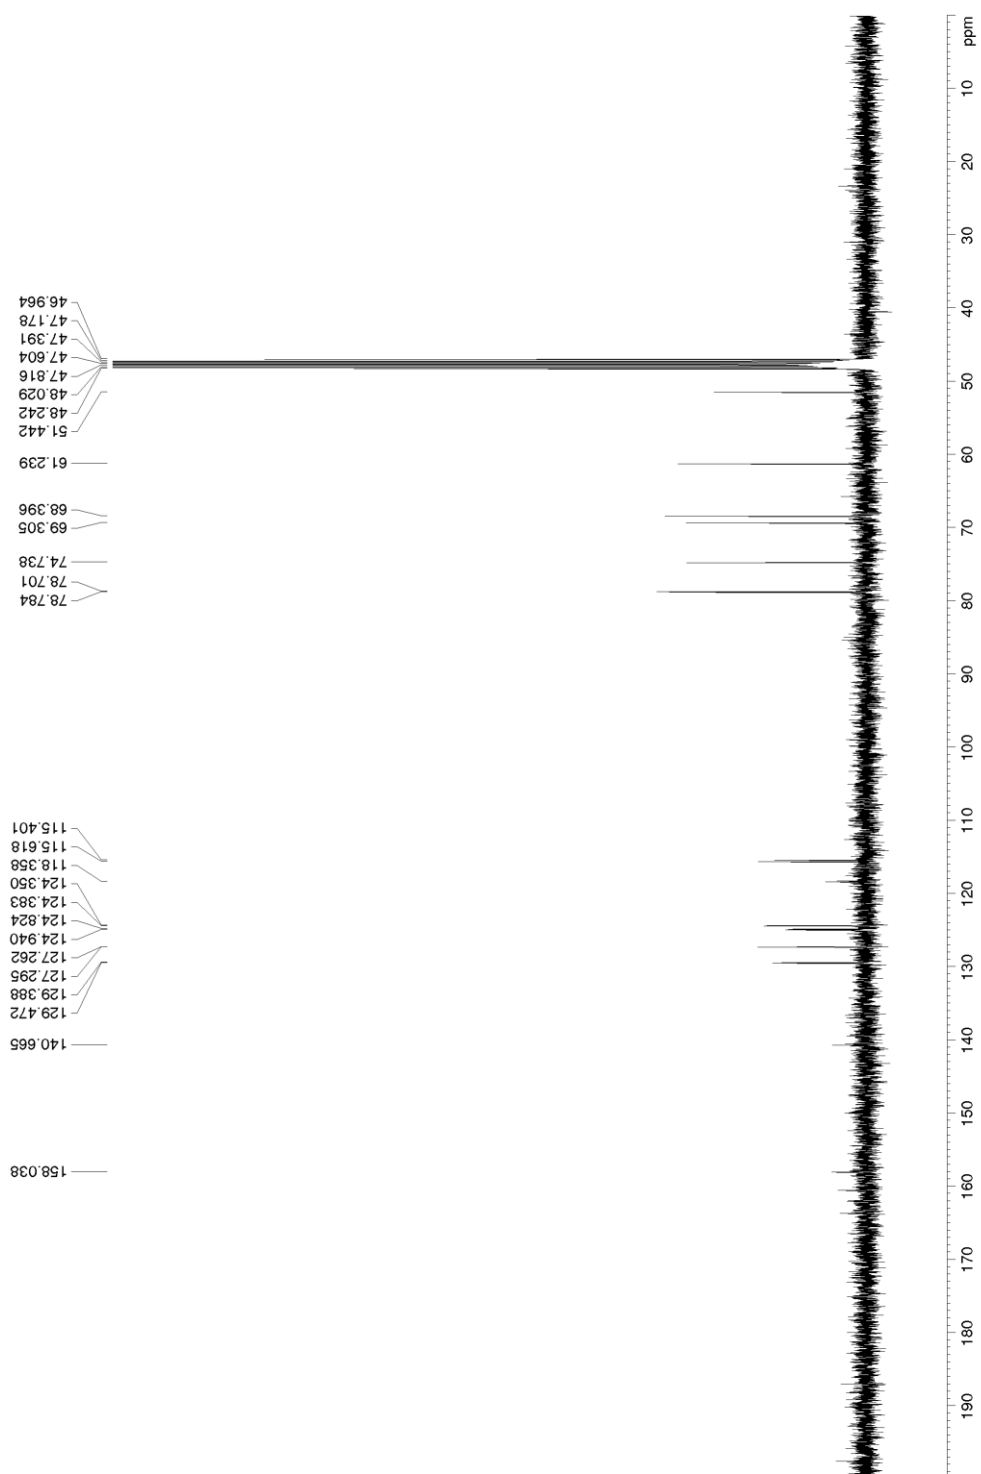

Compound **1e**:

$^1\text{H}$ :

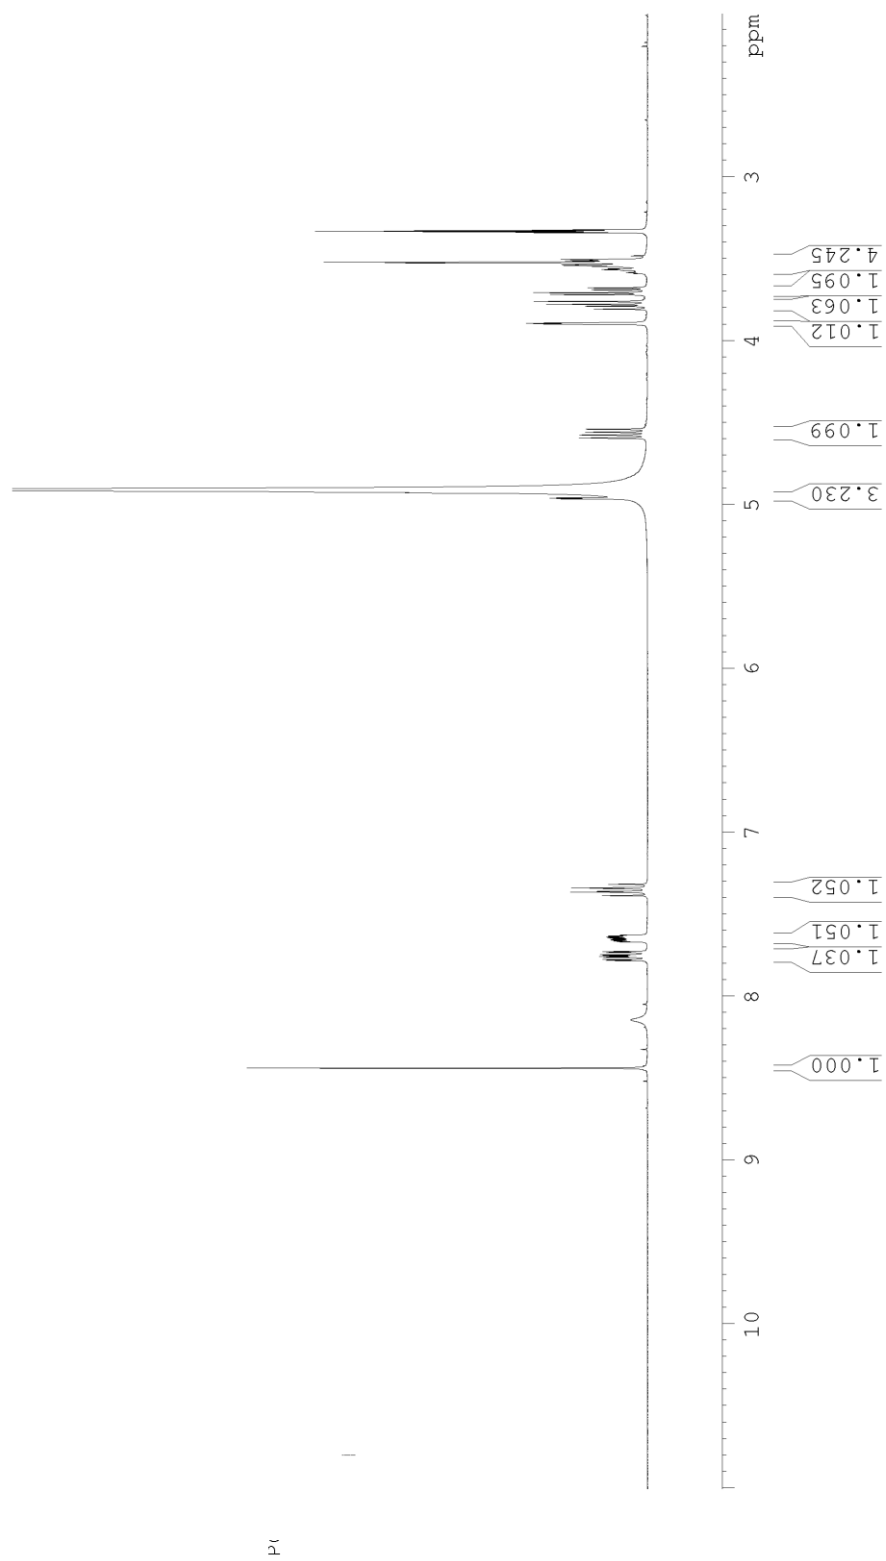

$^{13}\text{C}$ :

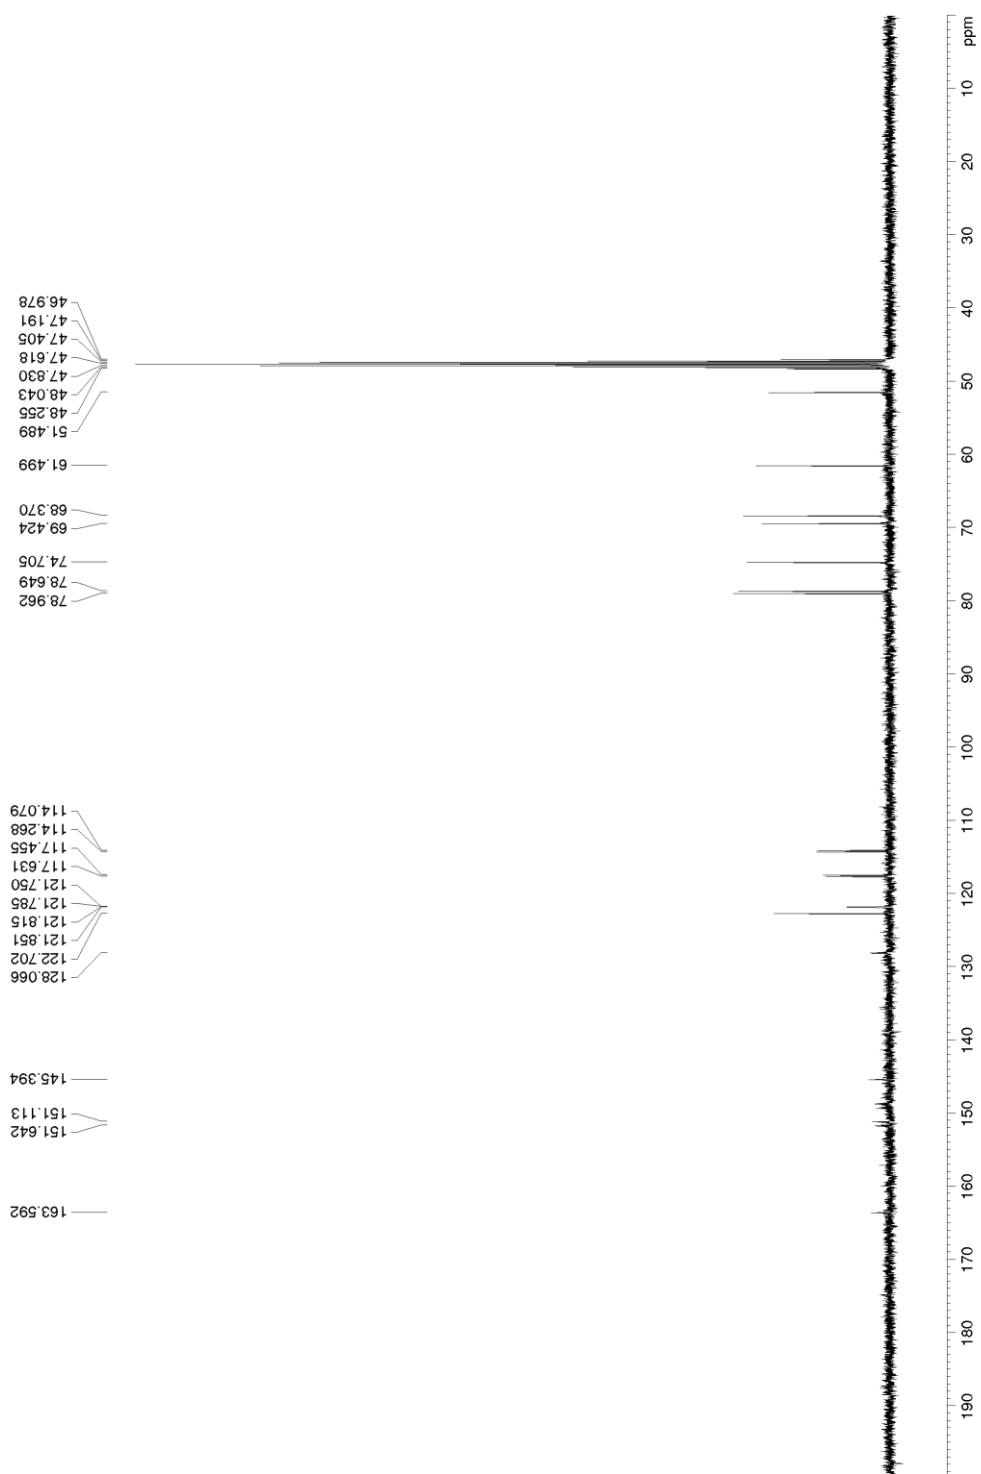

Compound **1f**:

$^1\text{H}$ :

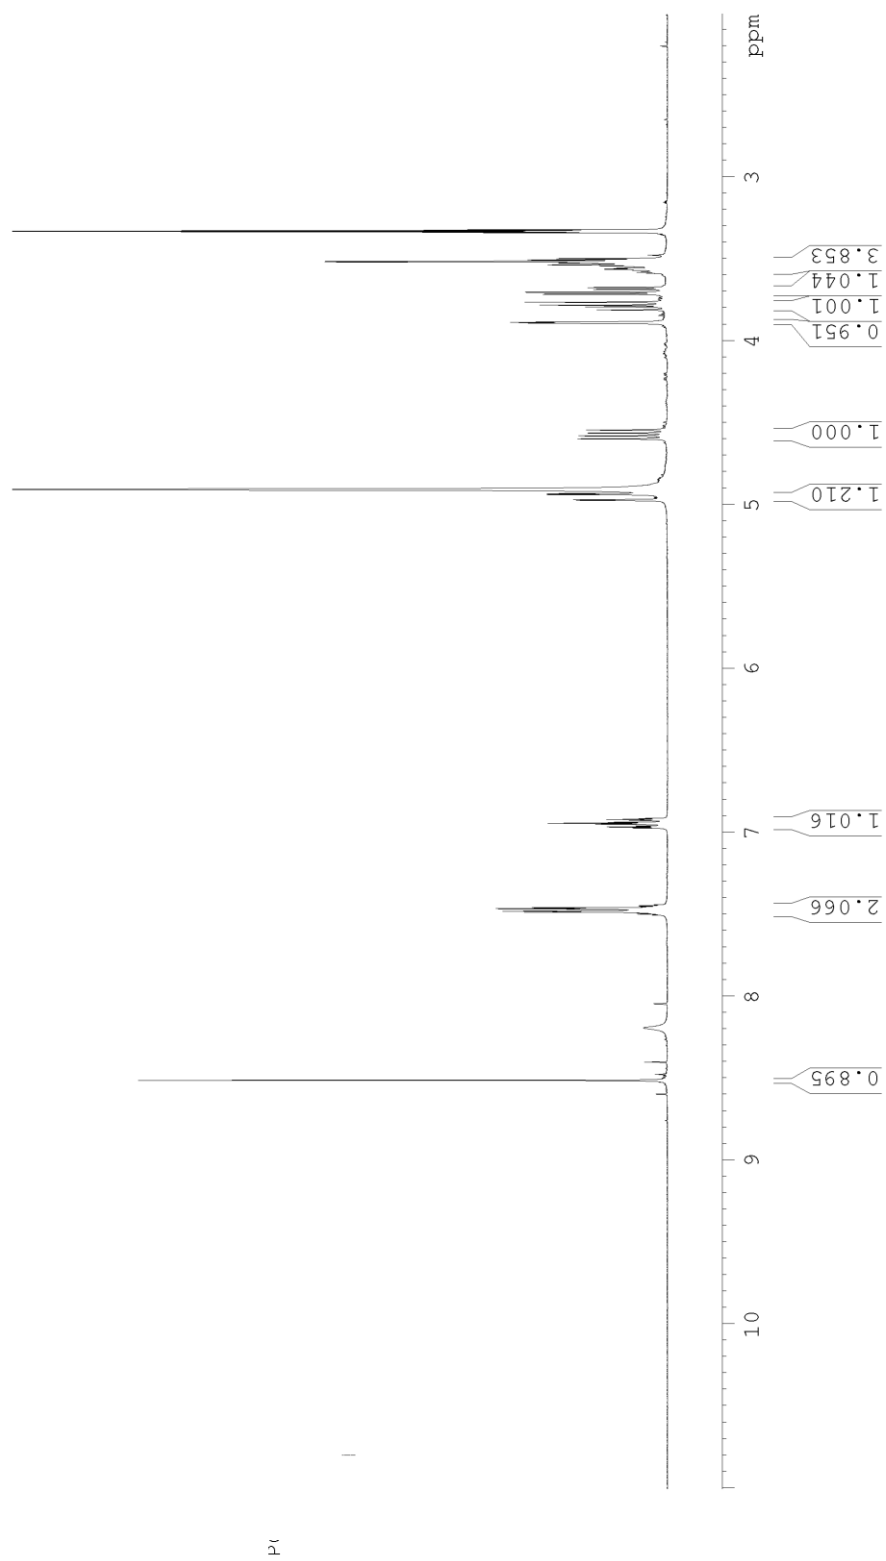

$^{13}\text{C}$ :

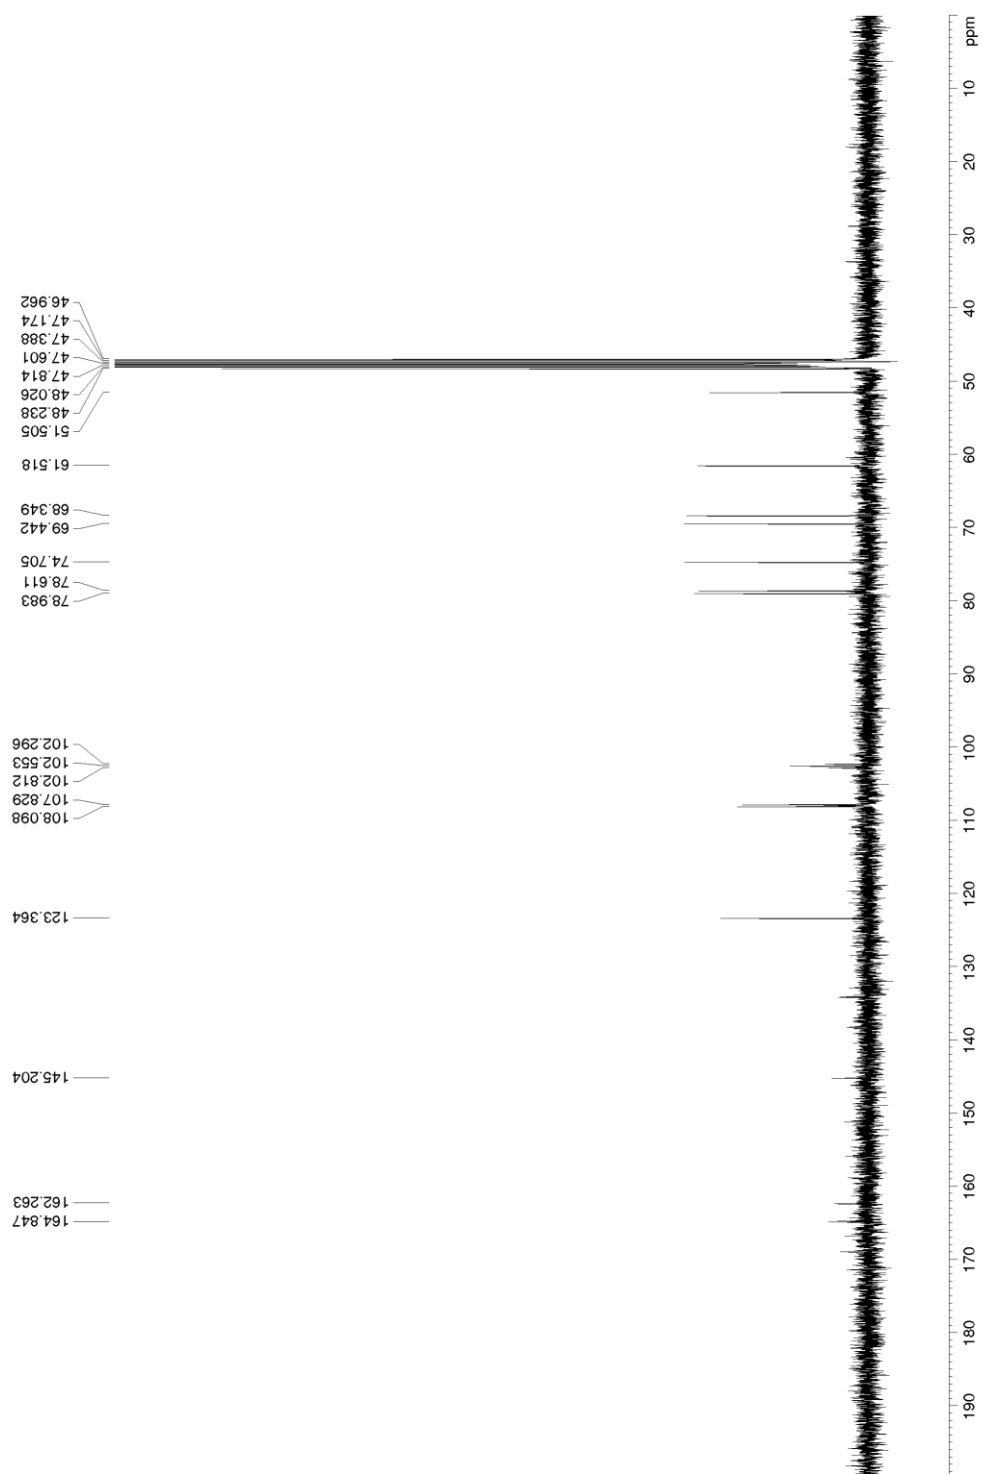

Compound **1g**:

$^1\text{H}$ :

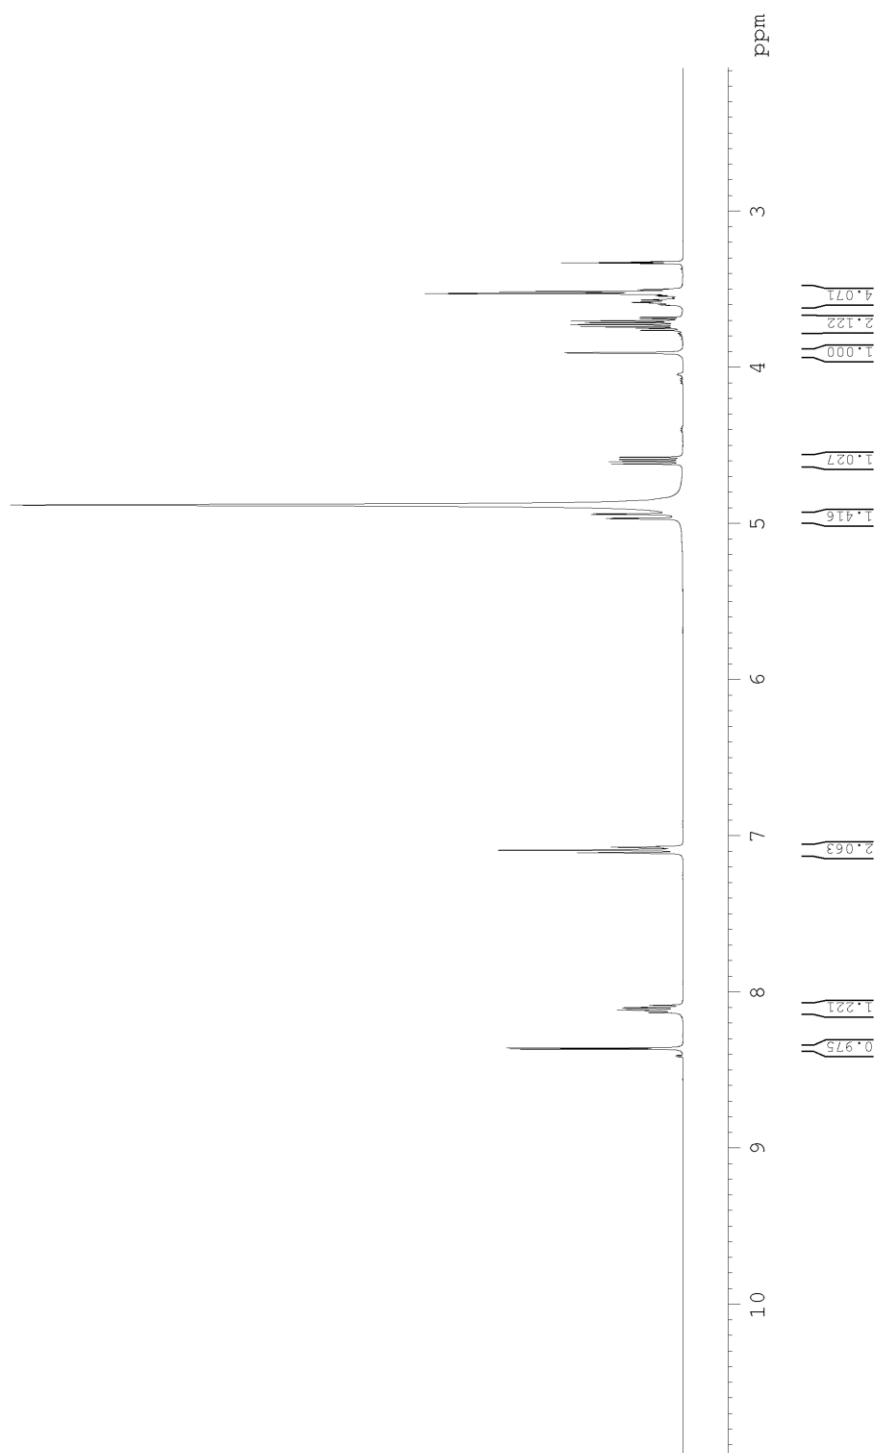

$^{13}\text{C}$ :

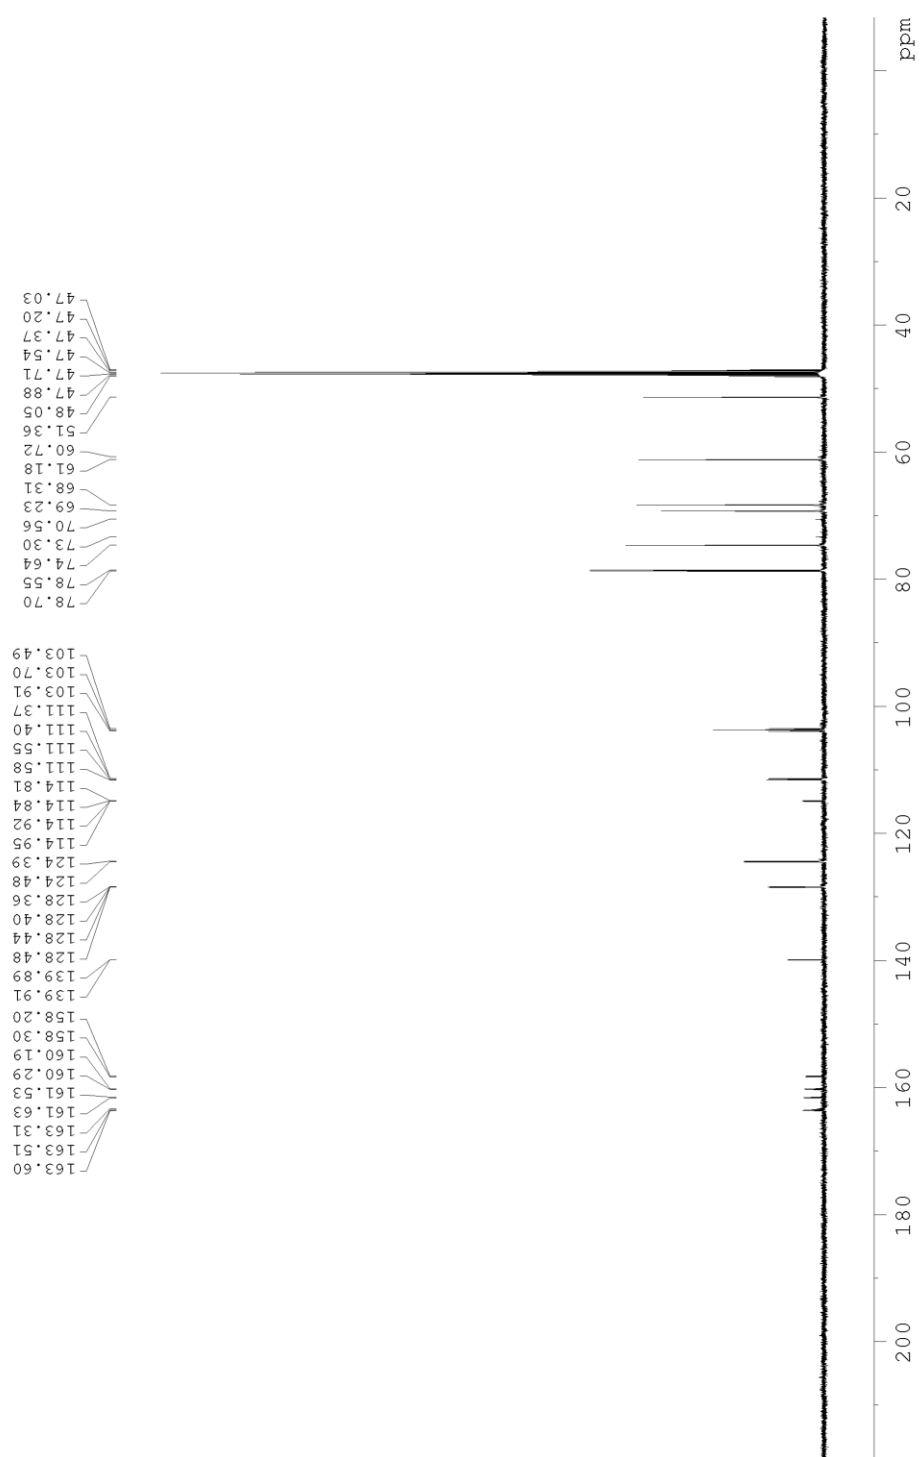

Compound **1h**:

$^1\text{H}$ :

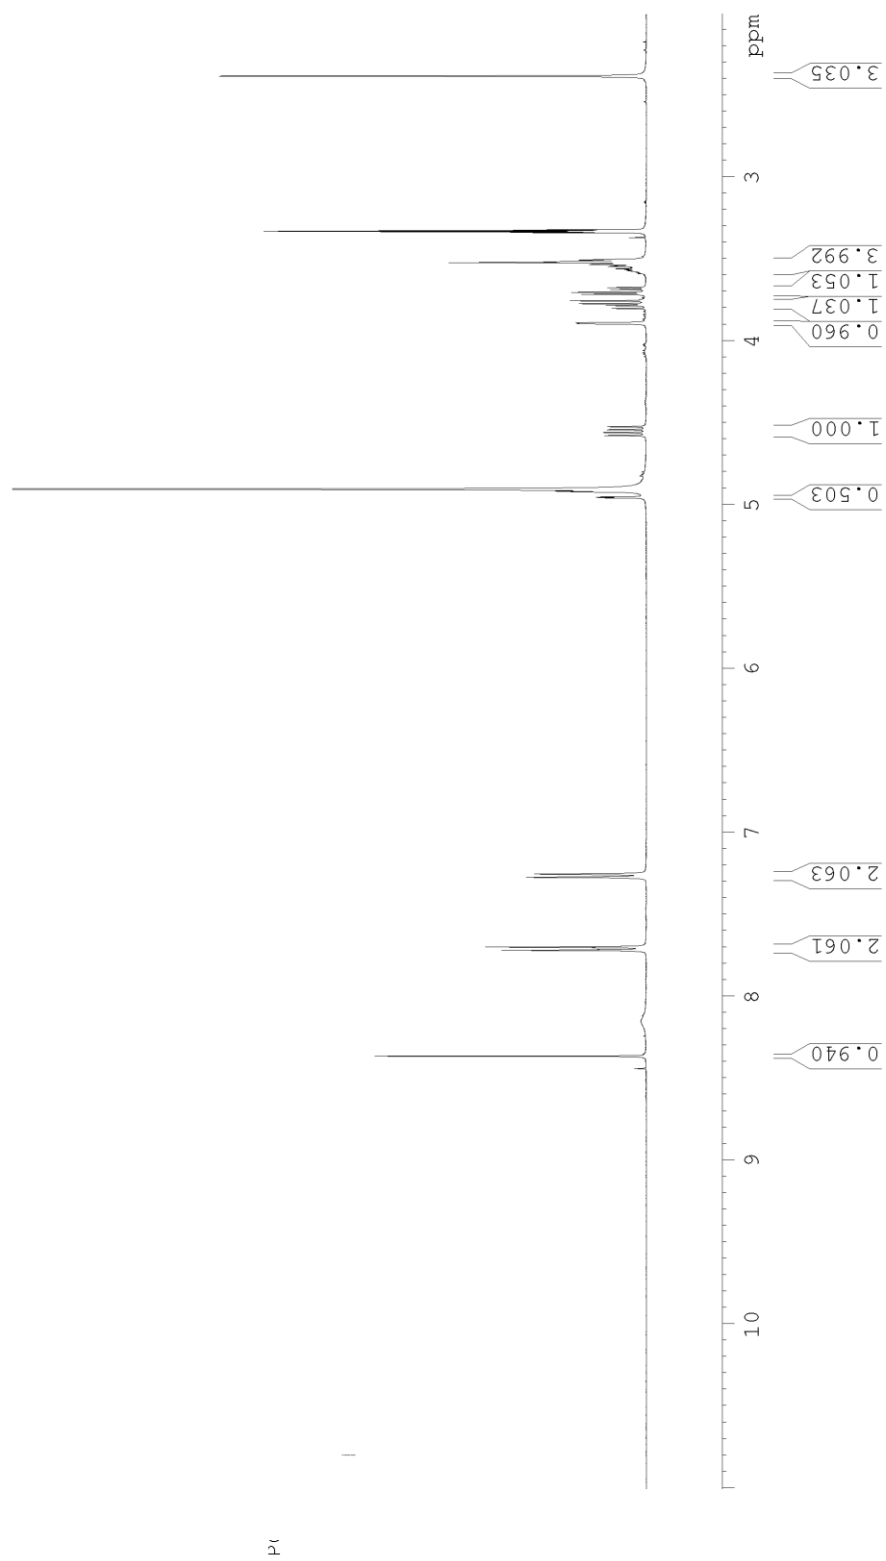



$^{13}\text{C}$ :

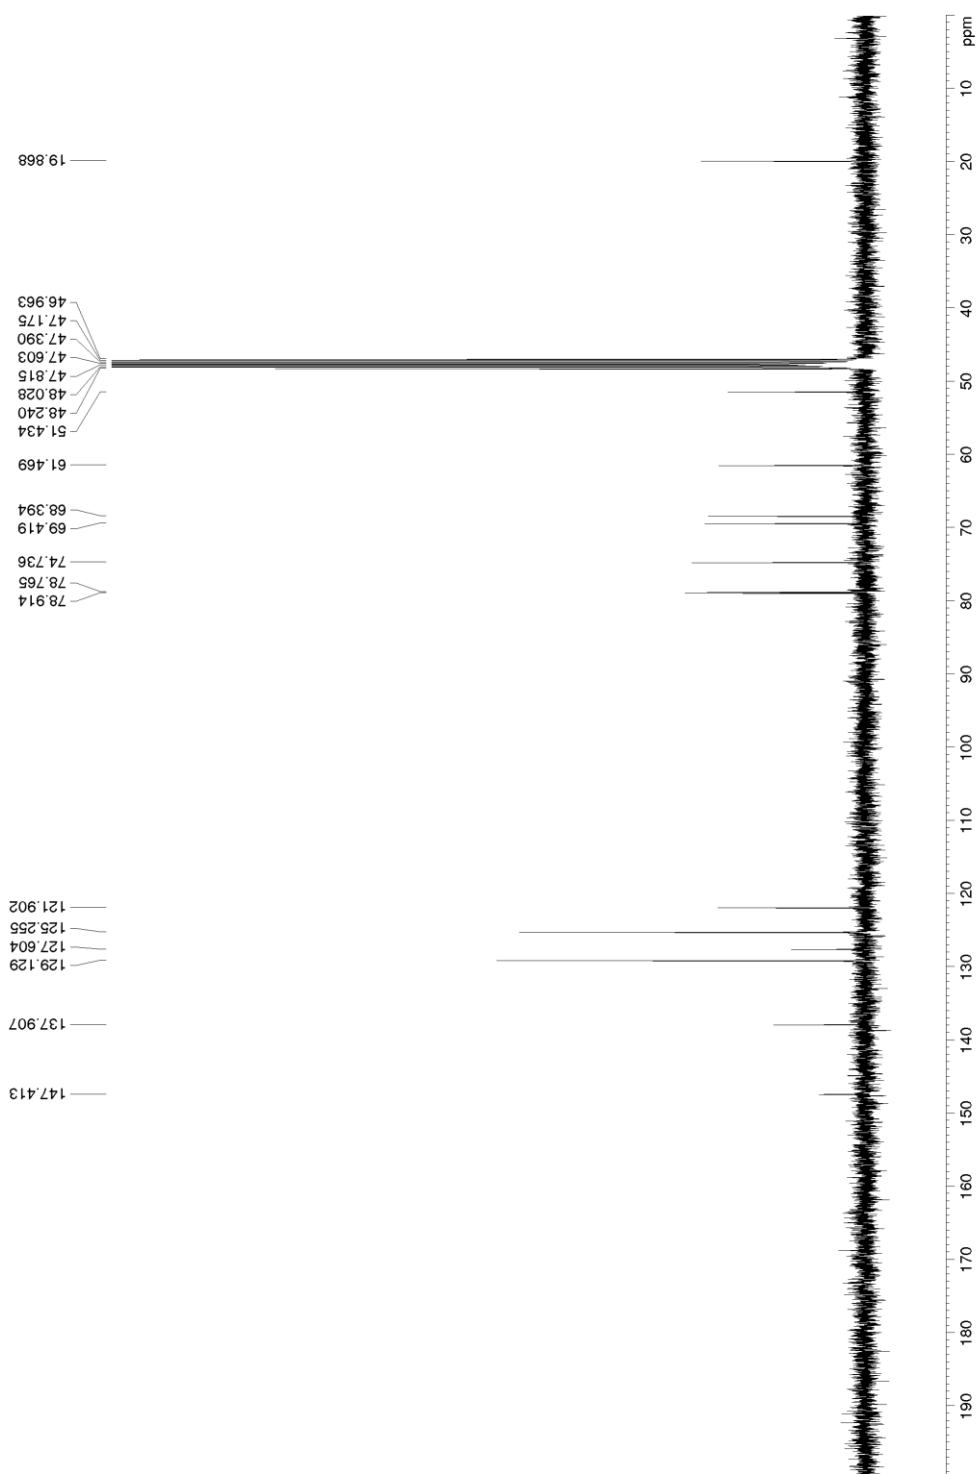

Compound **1i**:

$^1\text{H}$ :

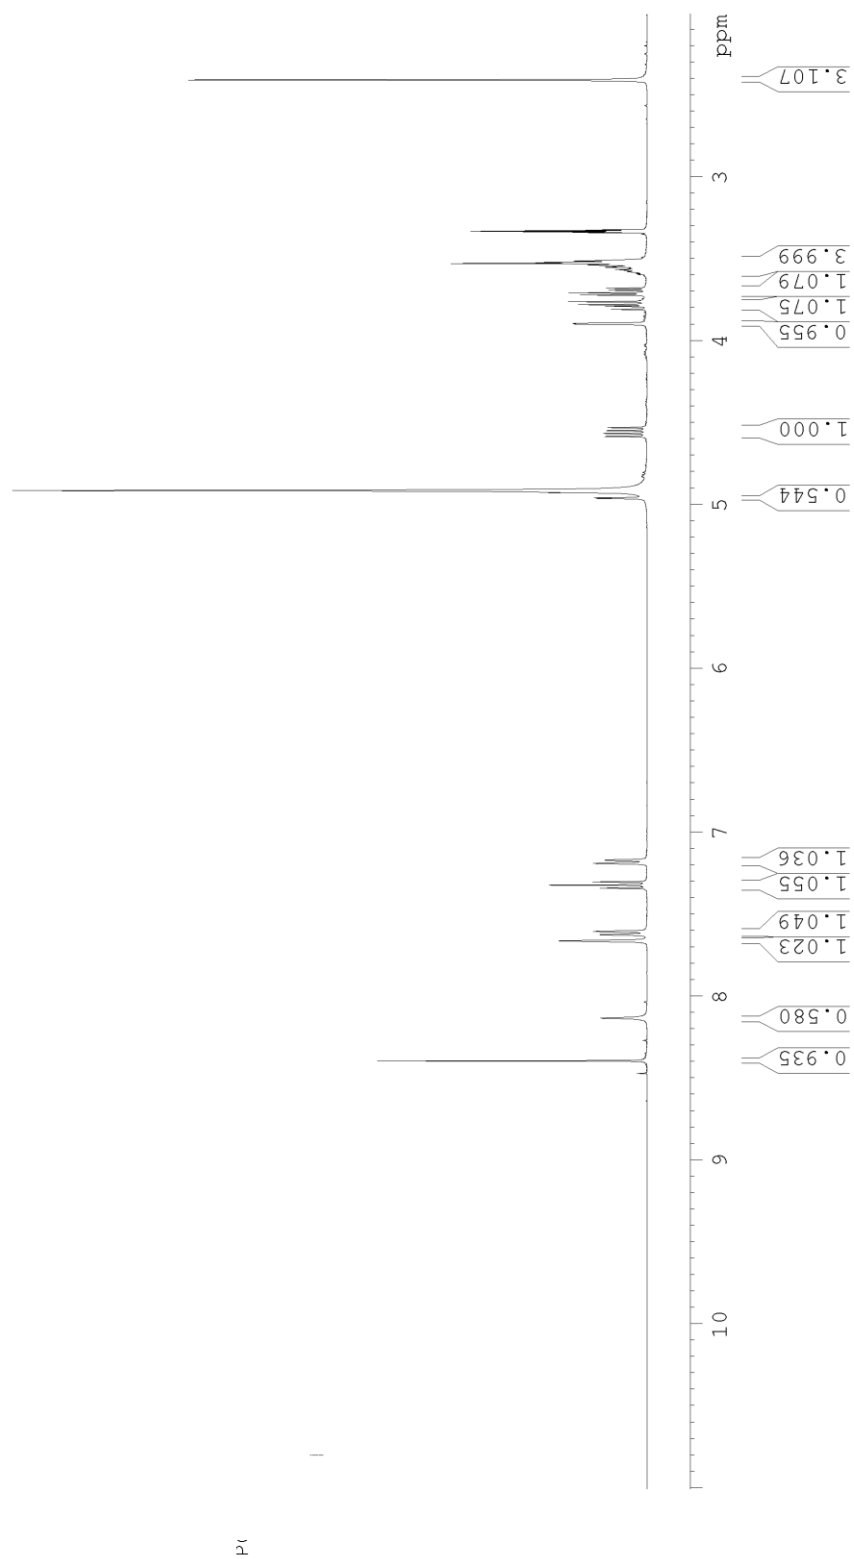

$^{13}\text{C}$ :

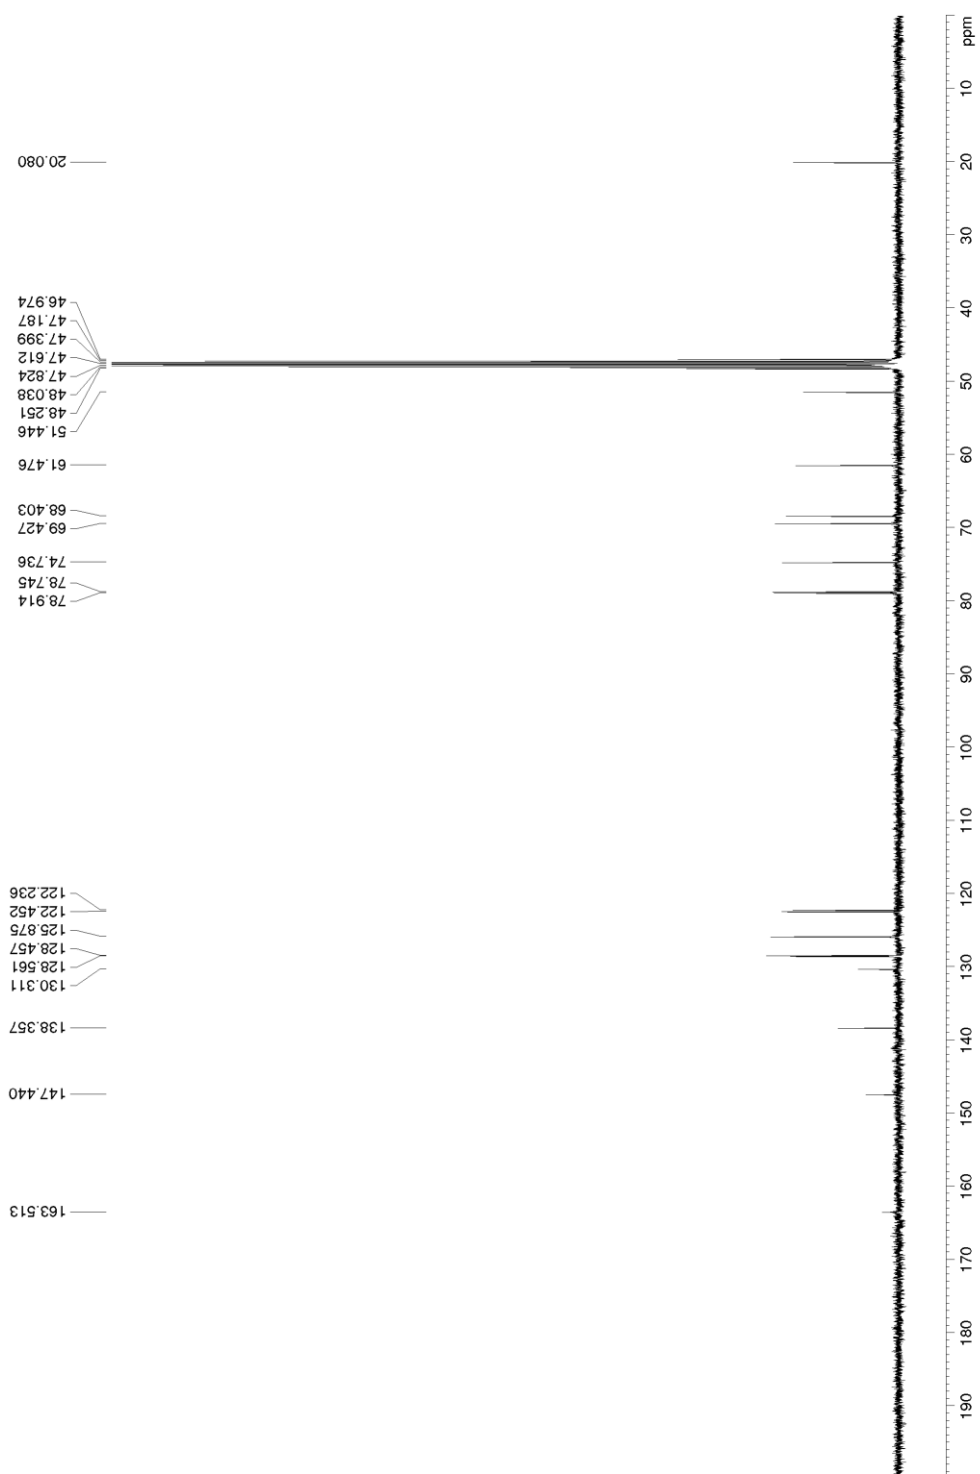

Compound **1j**:

$^1\text{H}$ :

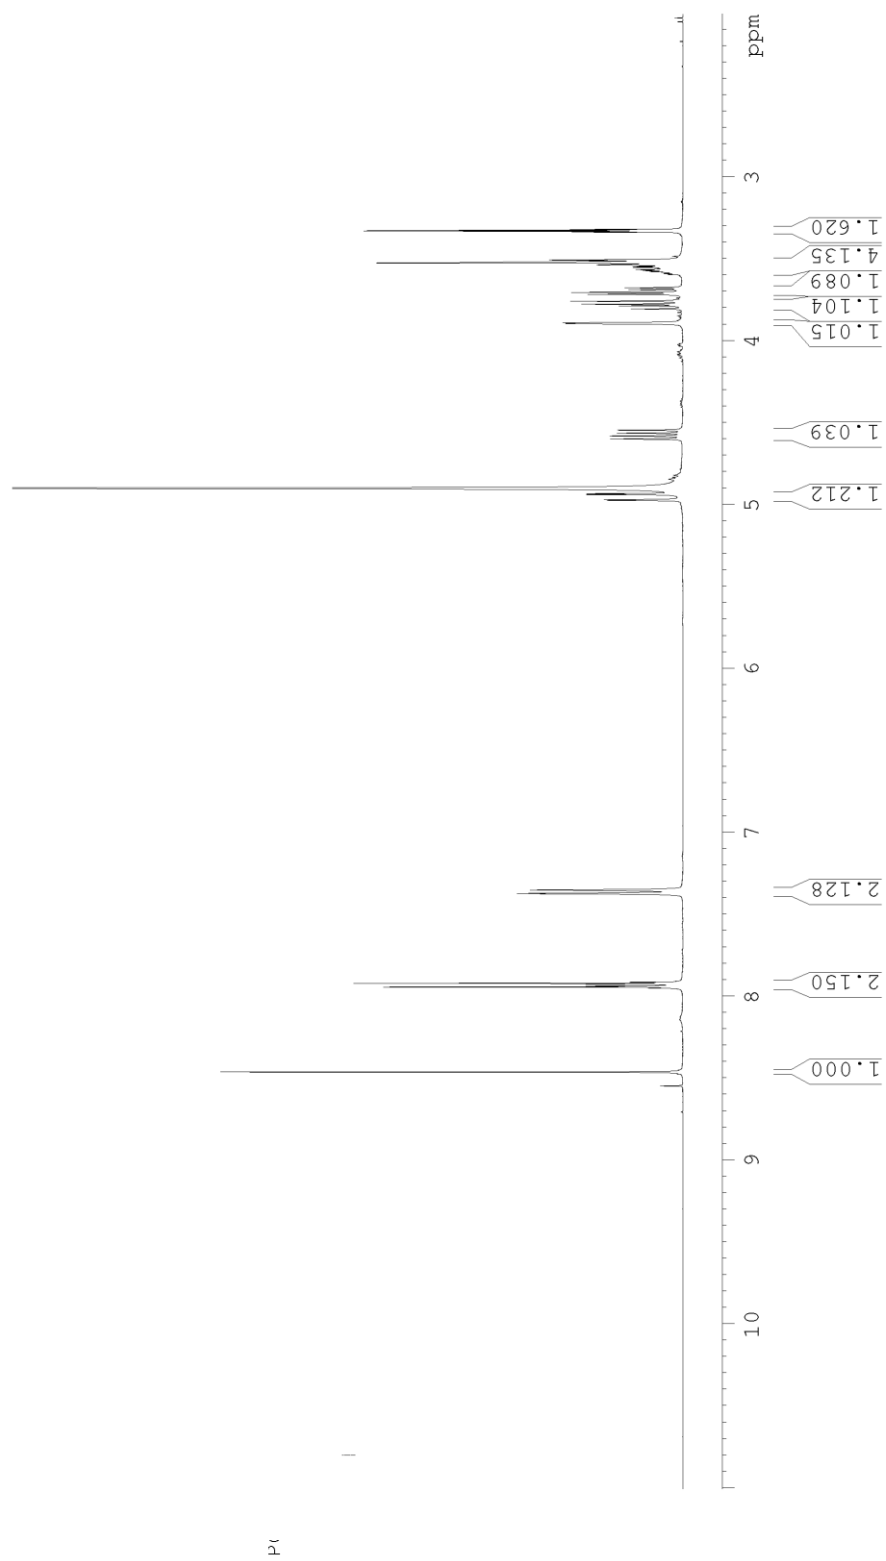

$^{13}\text{C}$ :

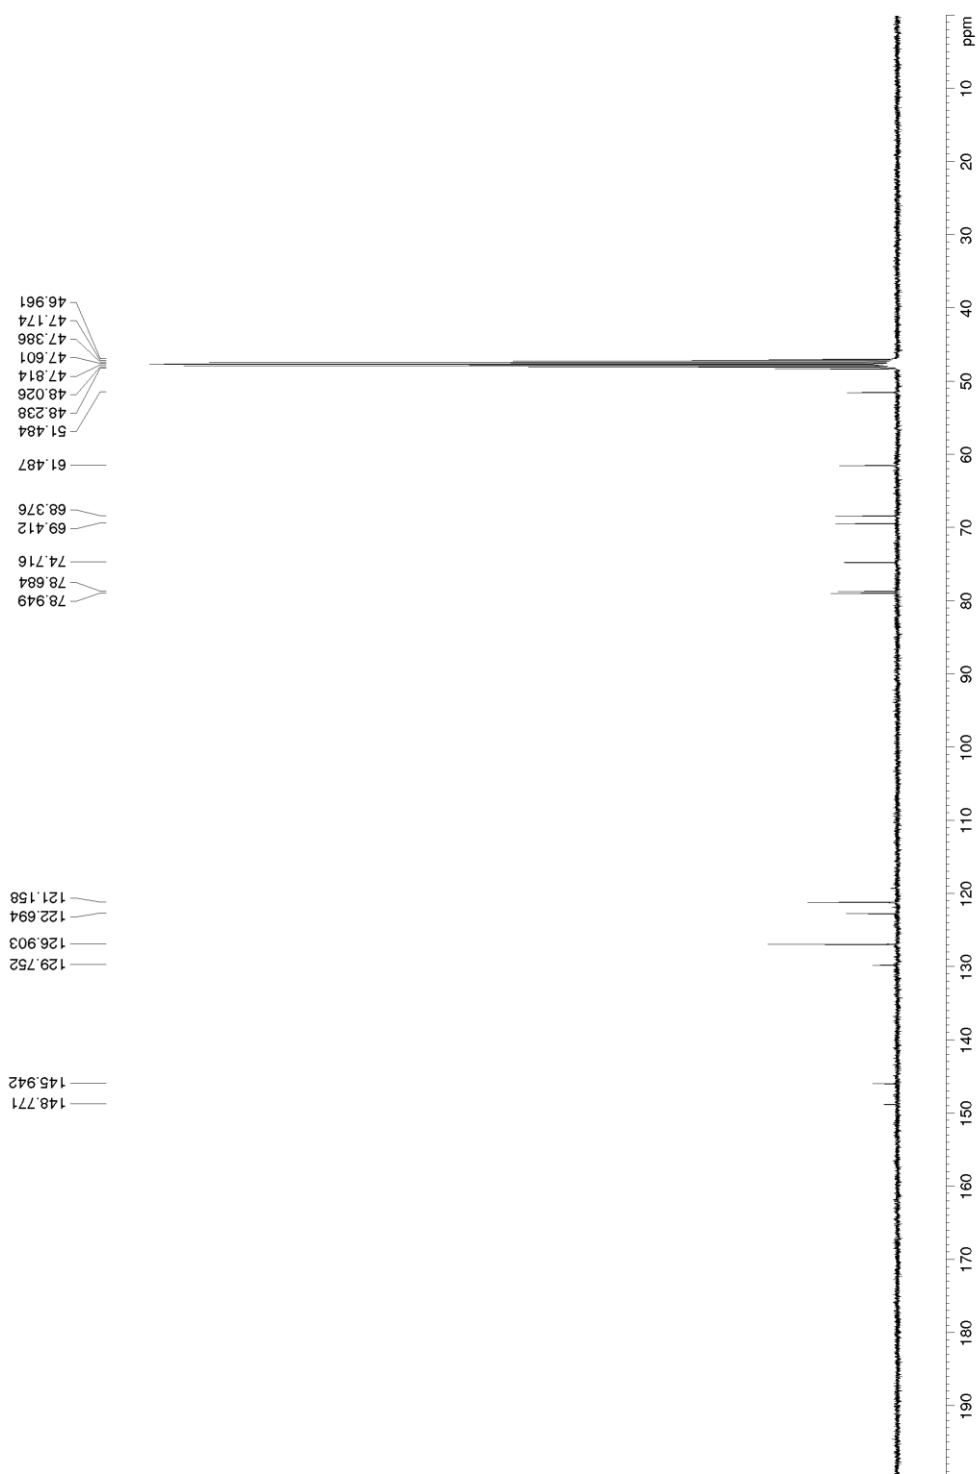

Compound **1k**:

$^1\text{H}$ :

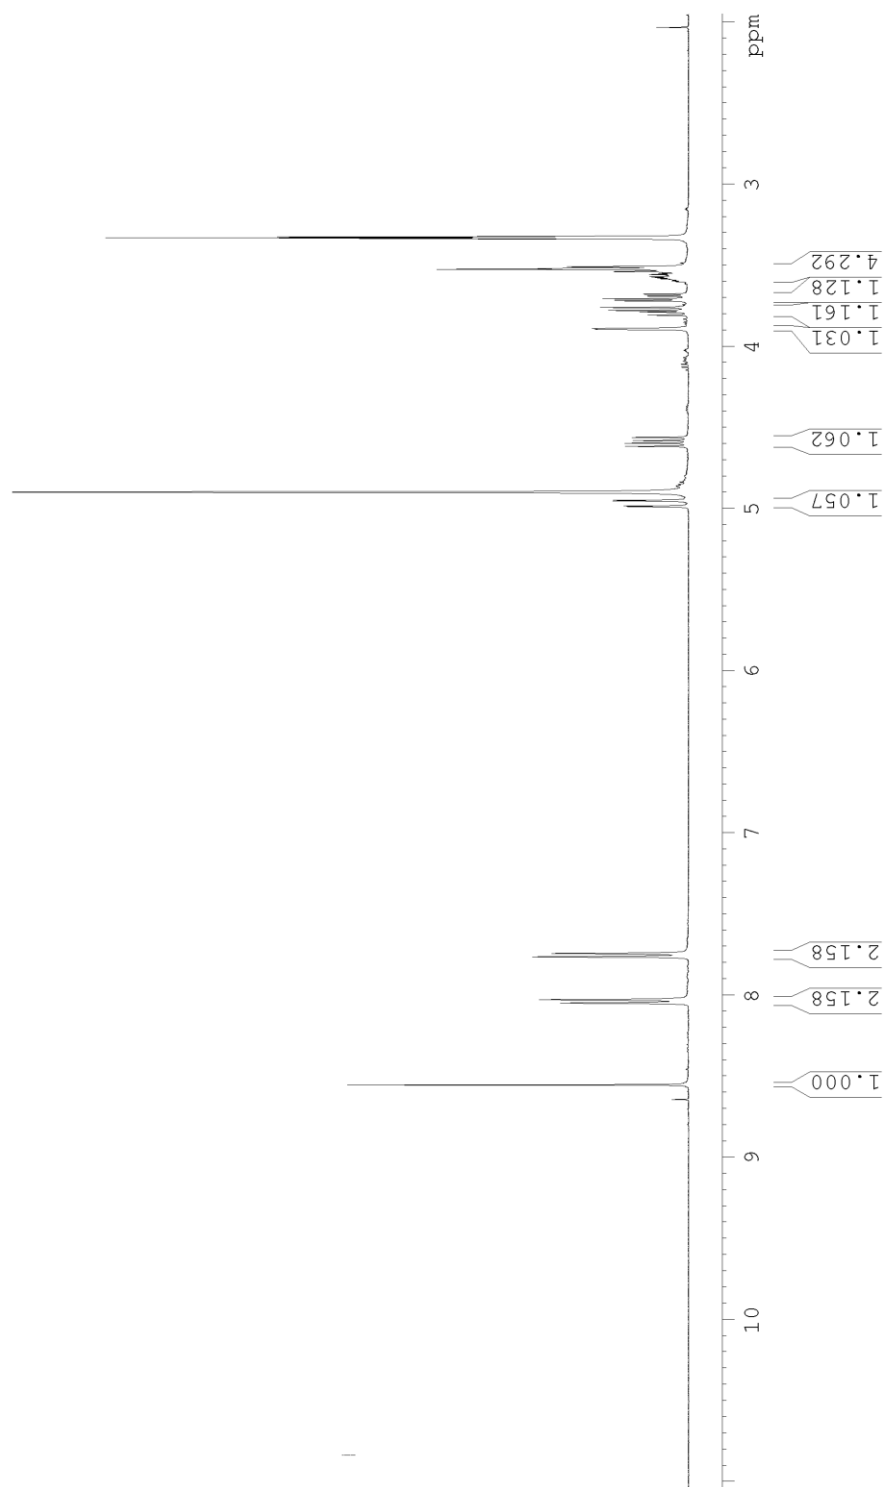

ppm

$^{13}\text{C}$ :

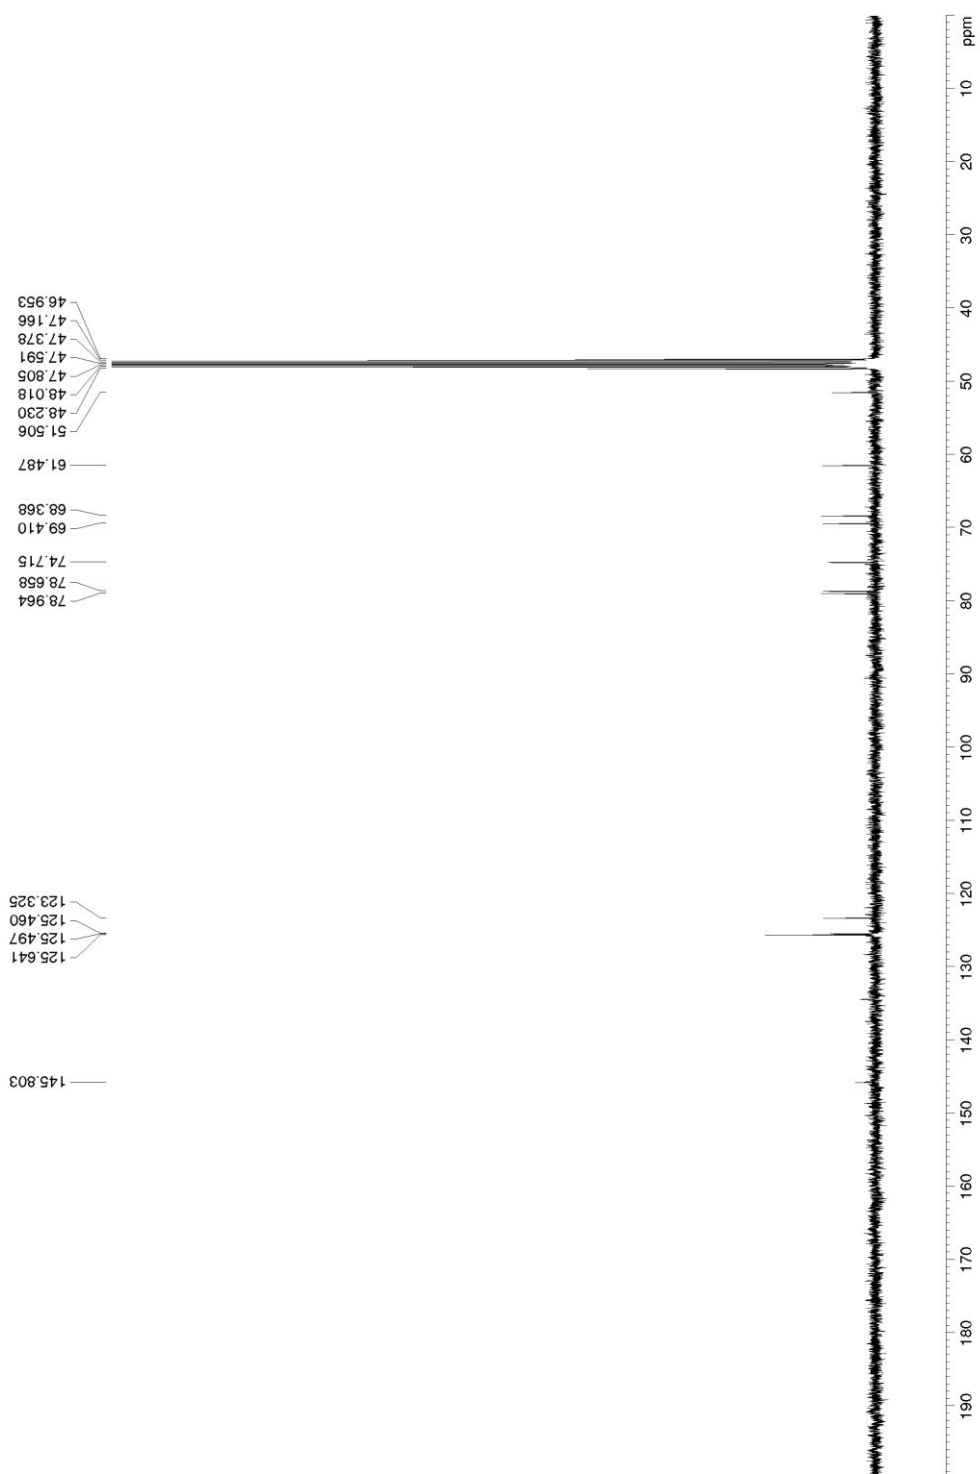

Compound **11**:

$^1\text{H}$ :

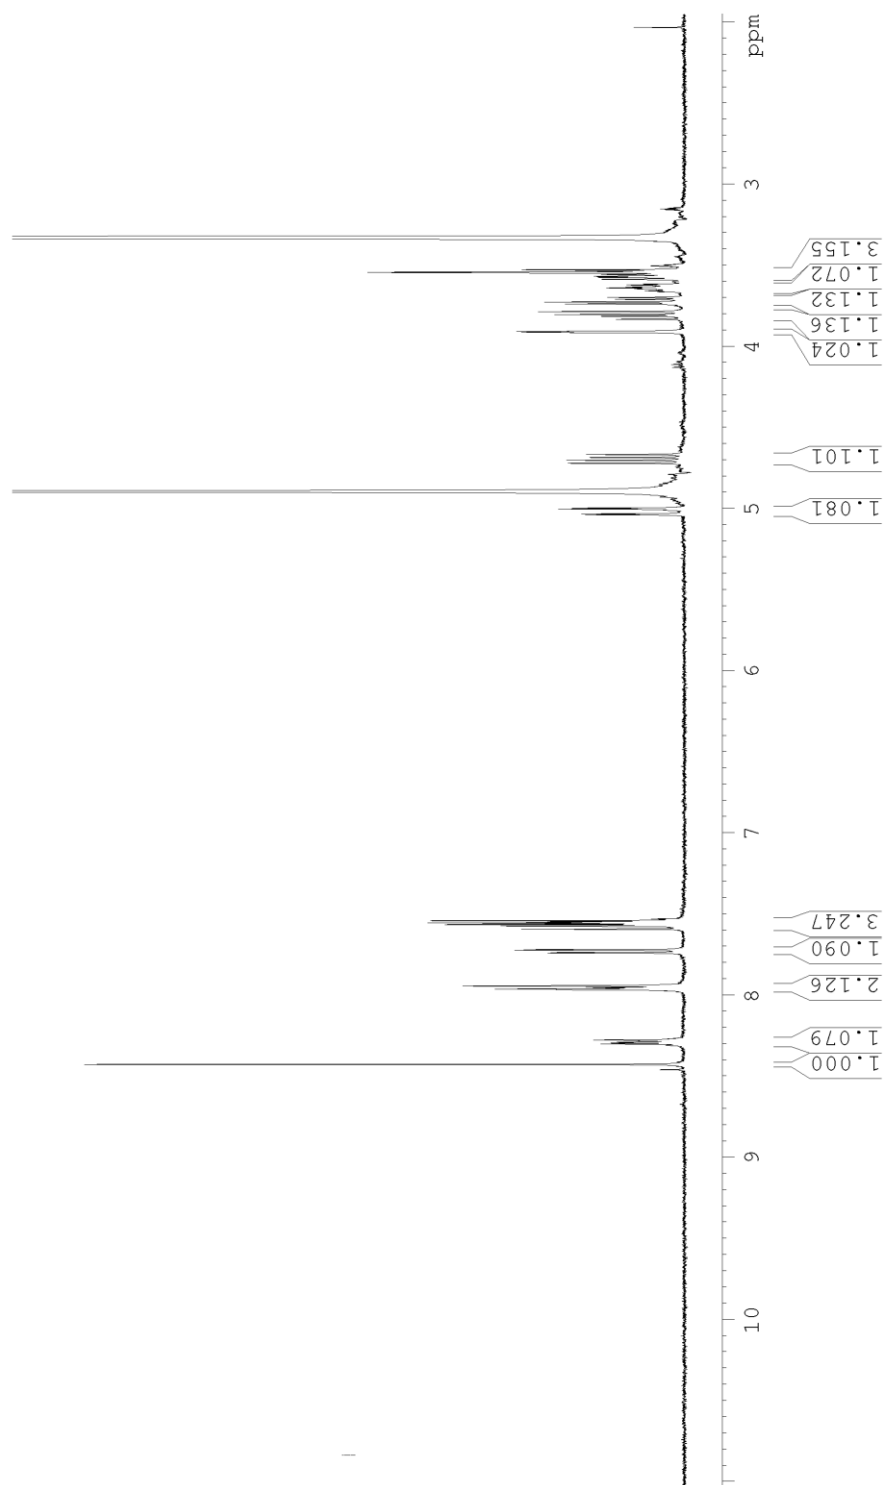



$^{13}\text{C}$ :

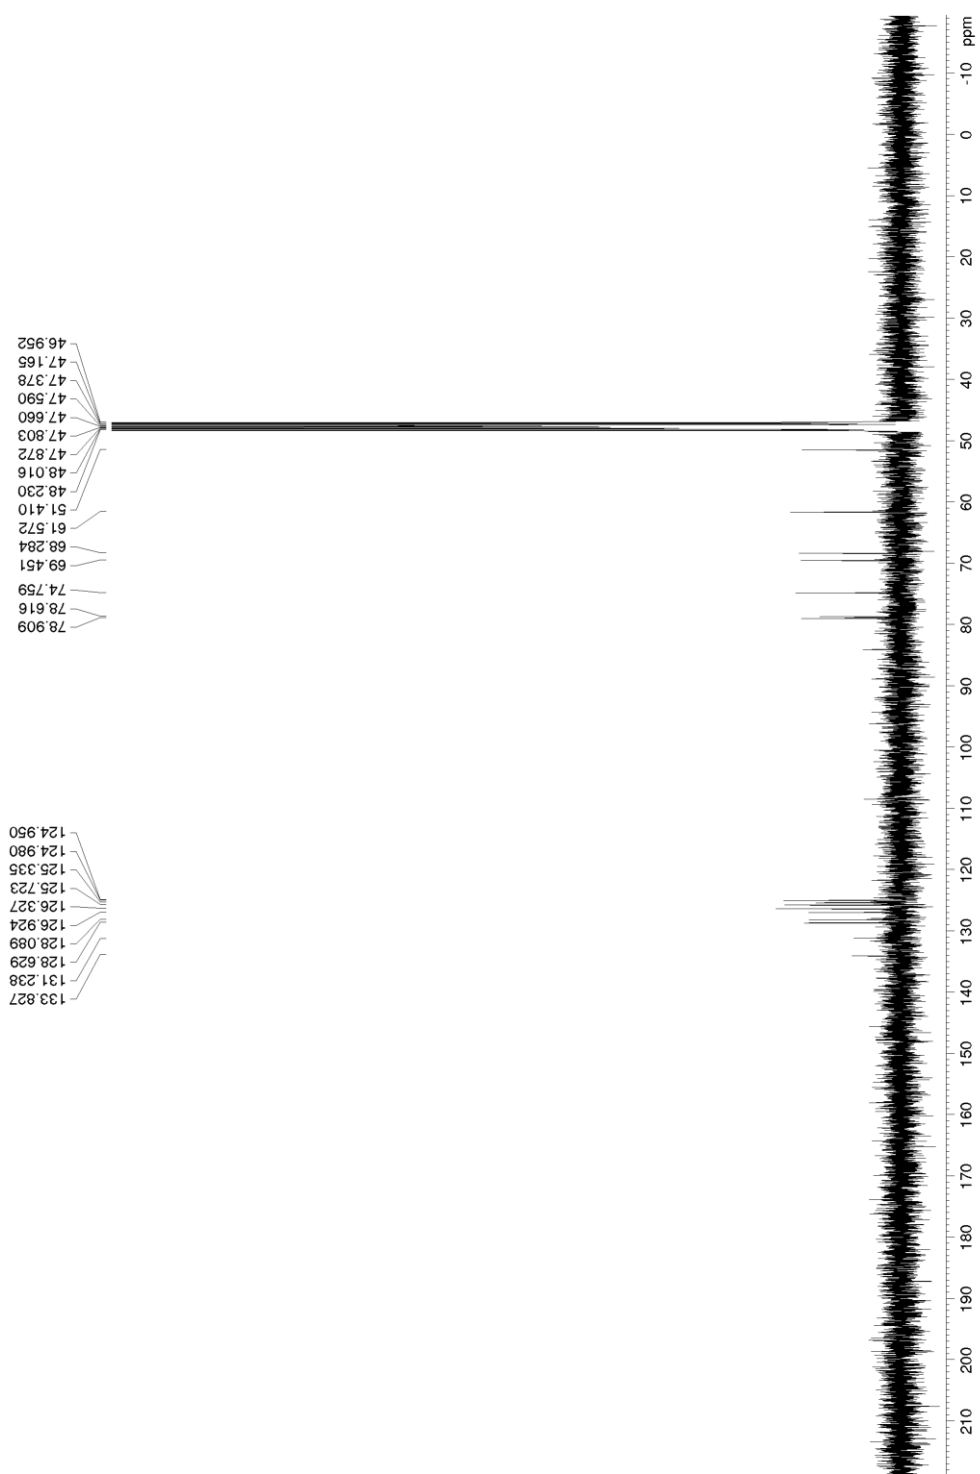

Compound **1m**:

$^1\text{H}$ :

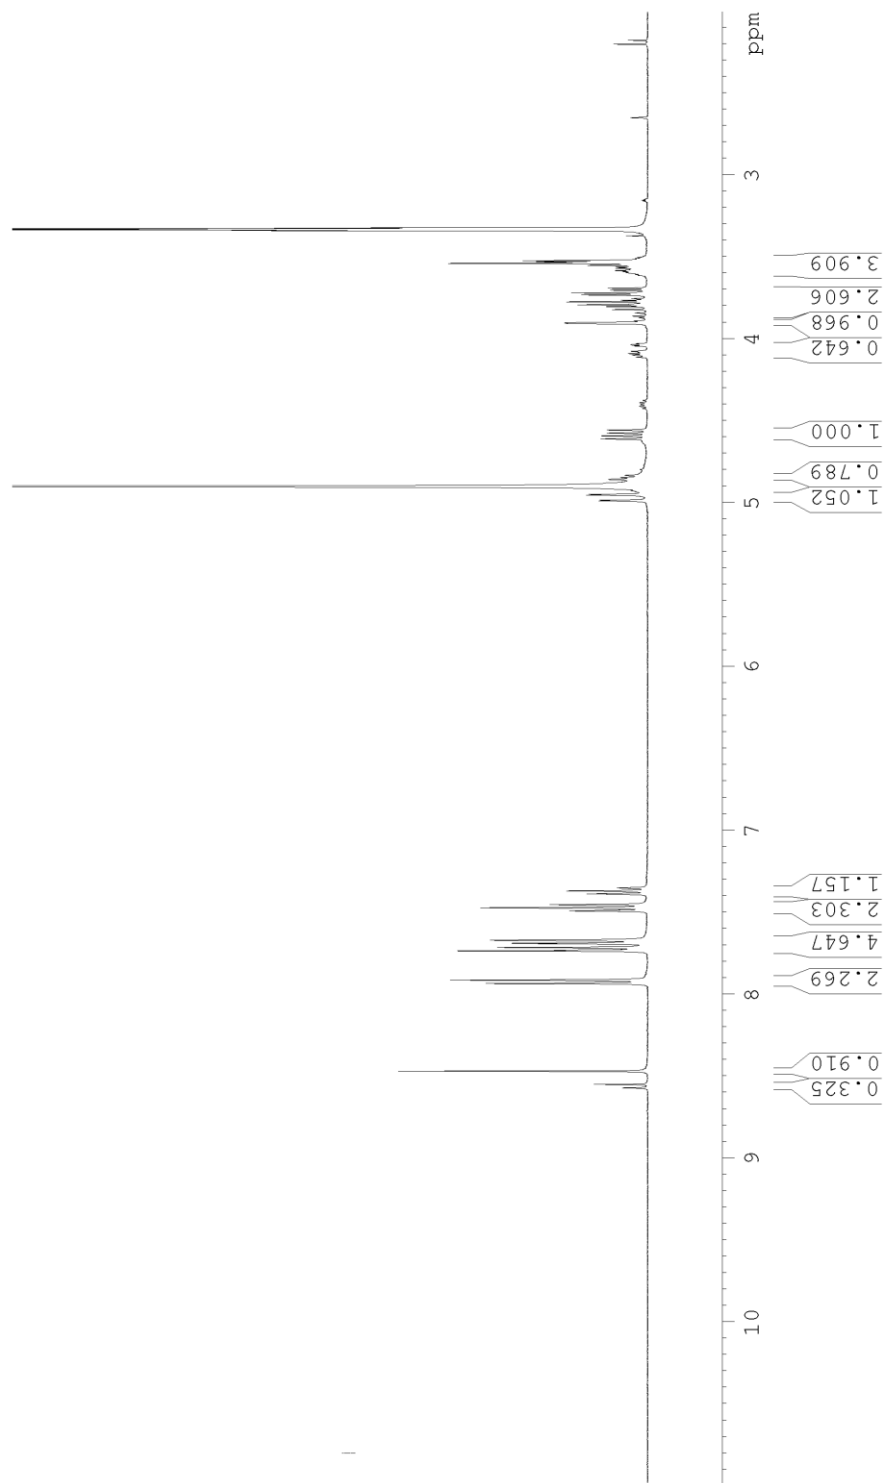

$^{13}\text{C}$ :

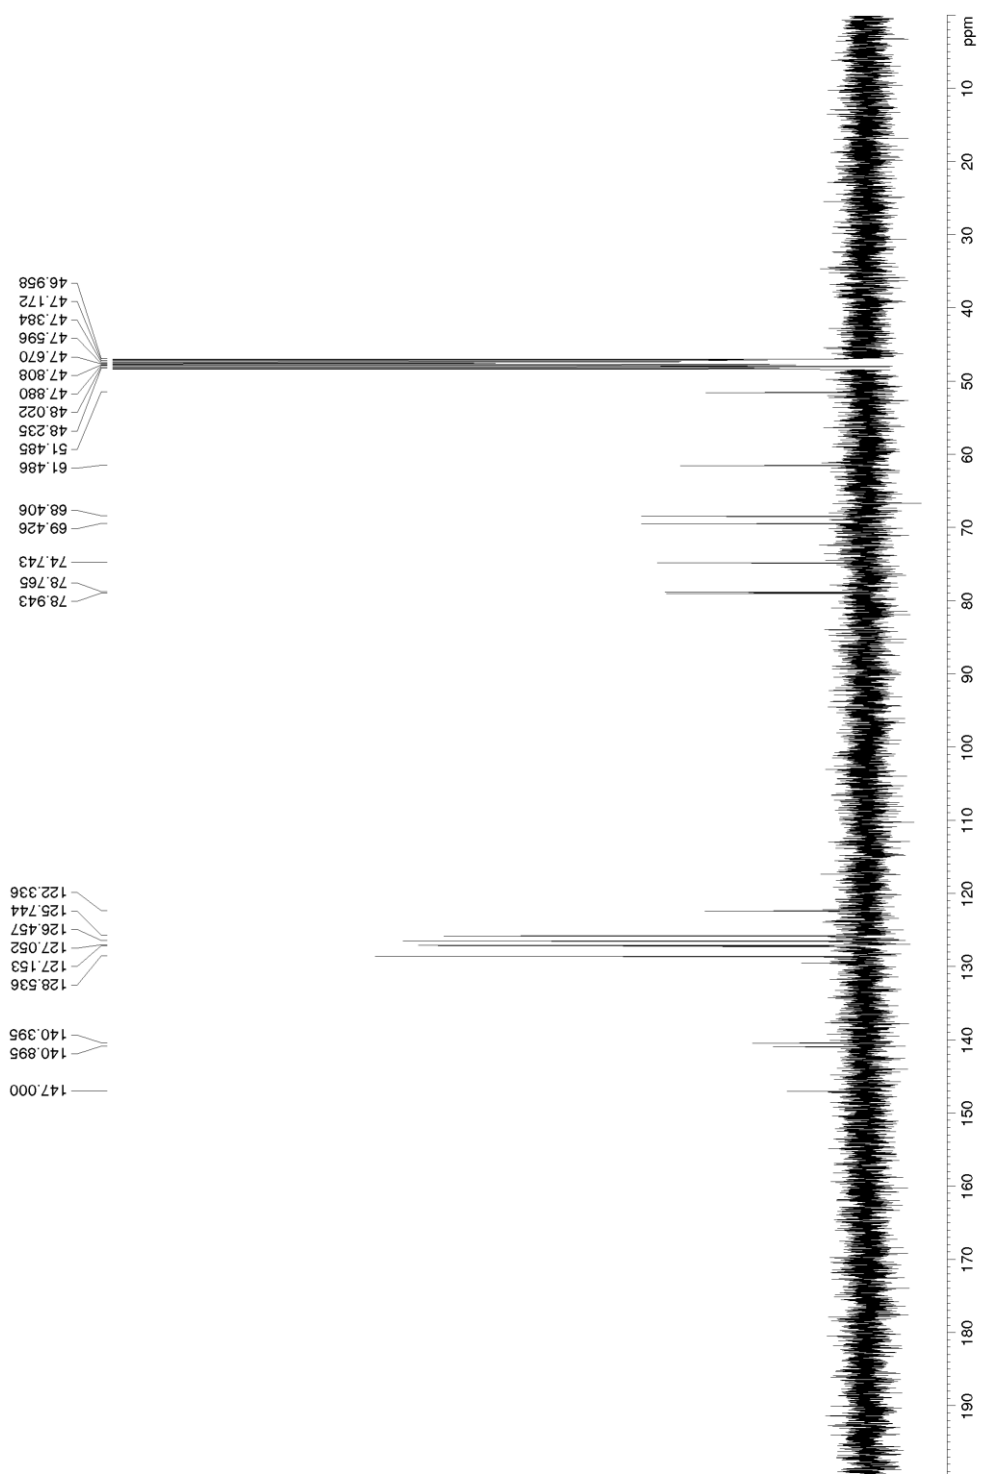

Compound **1n**:

$^1\text{H}$ :

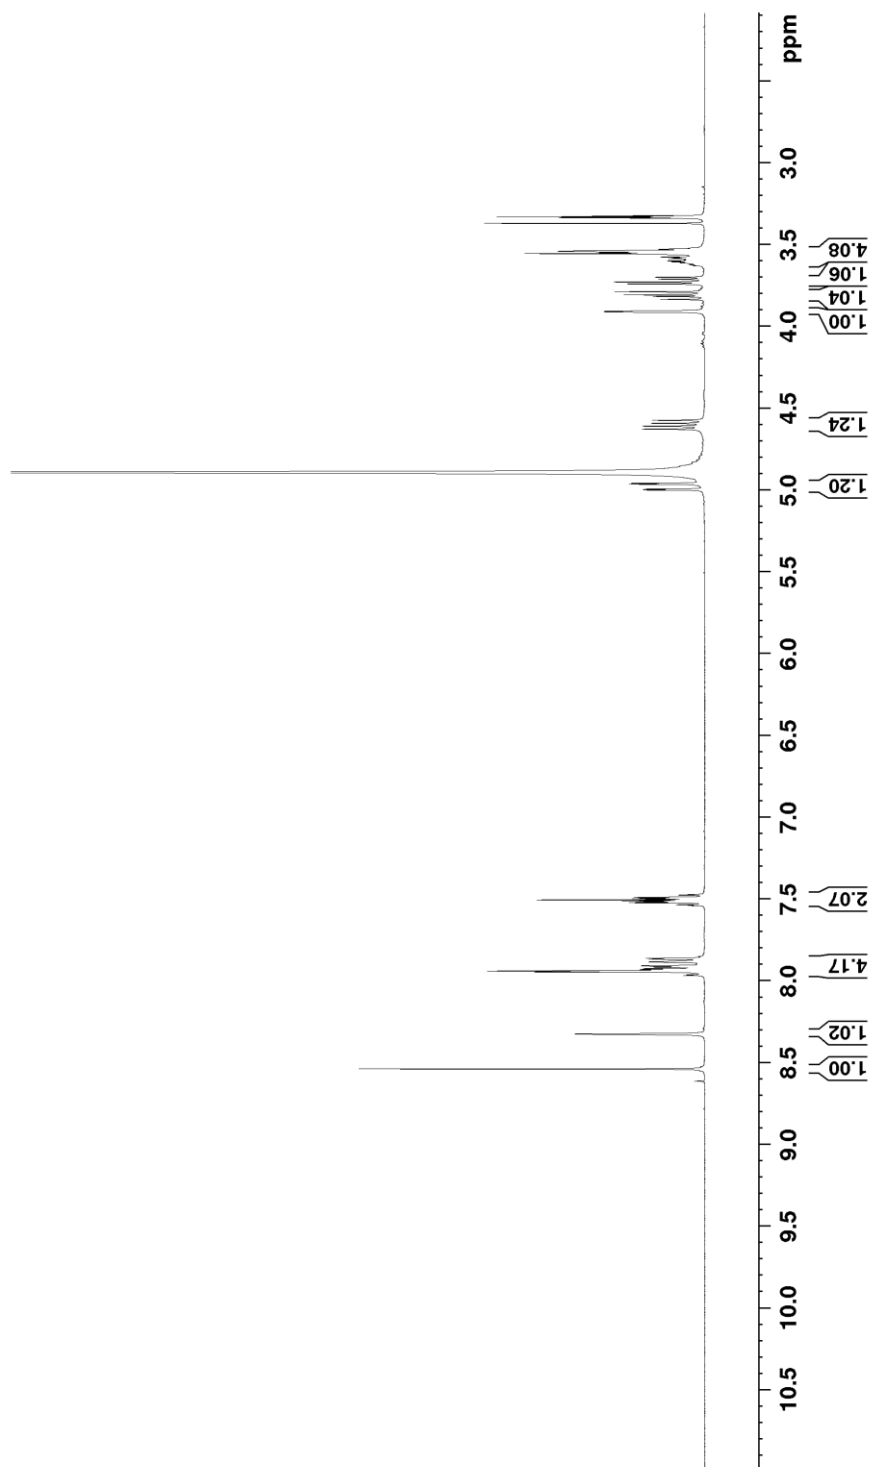

$^{13}\text{C}$ :

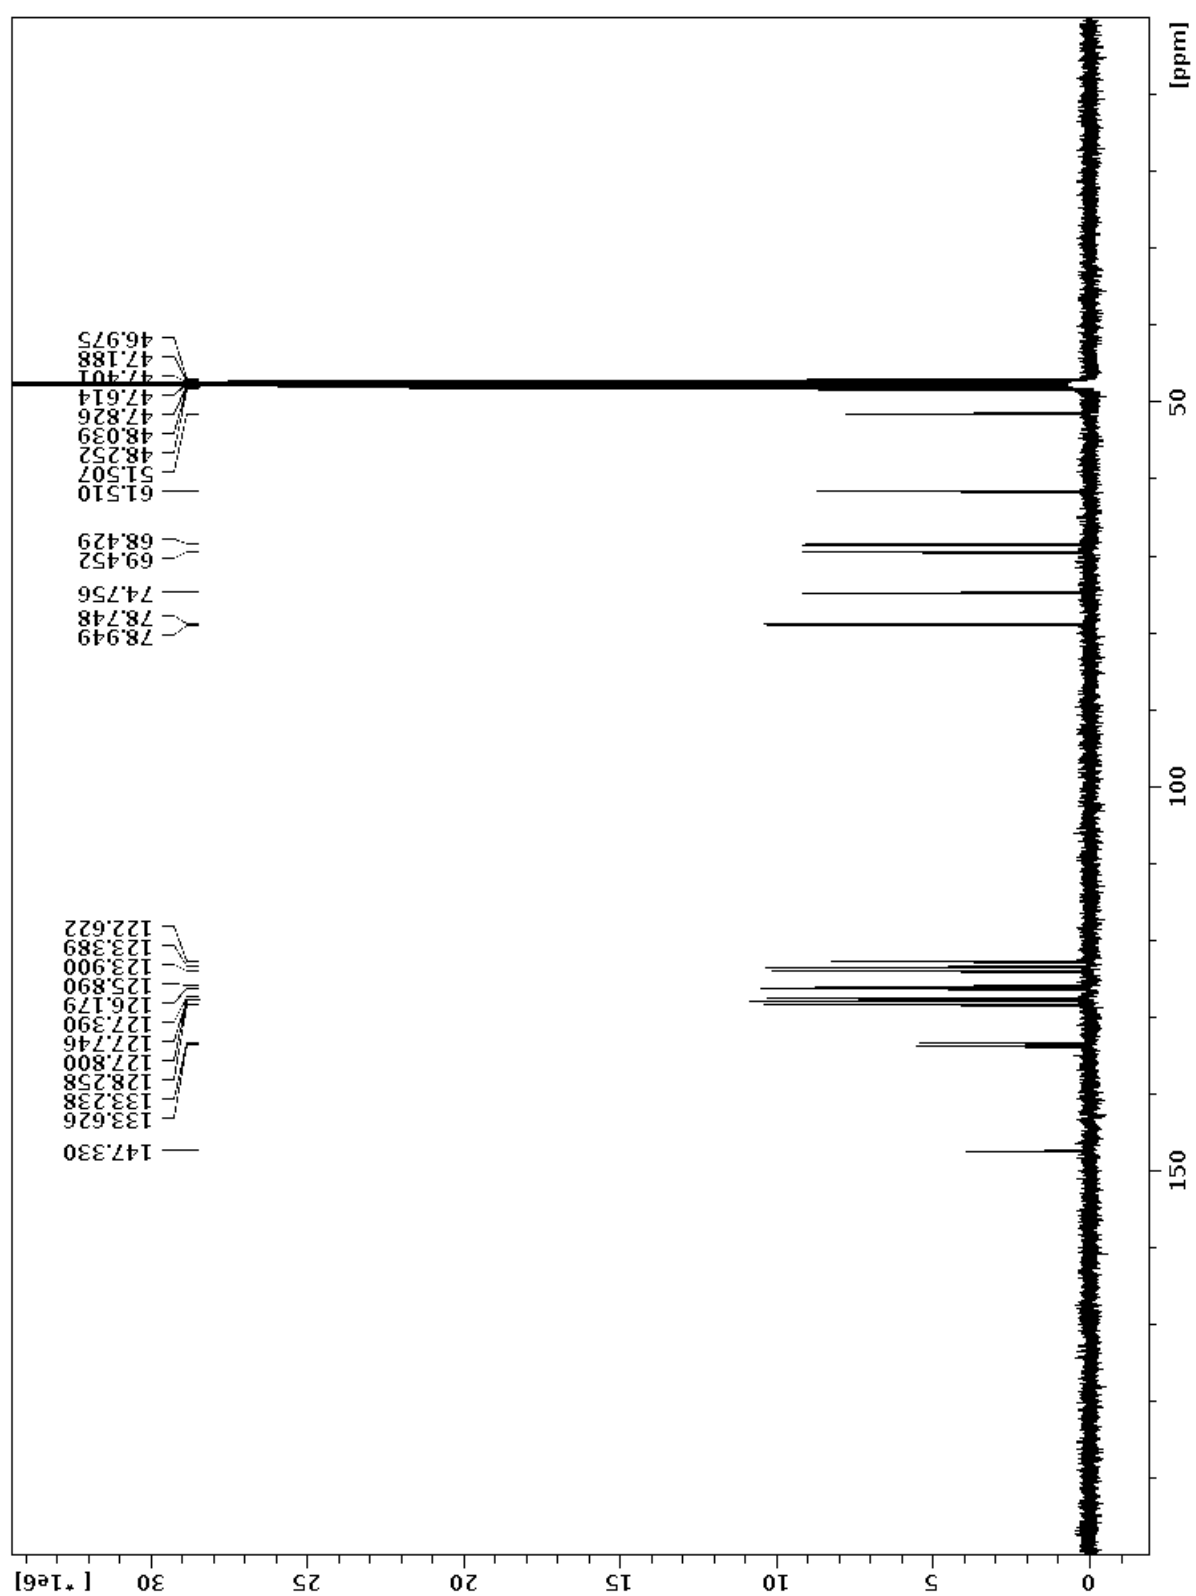

Compound **3**:

$^1\text{H}$ :

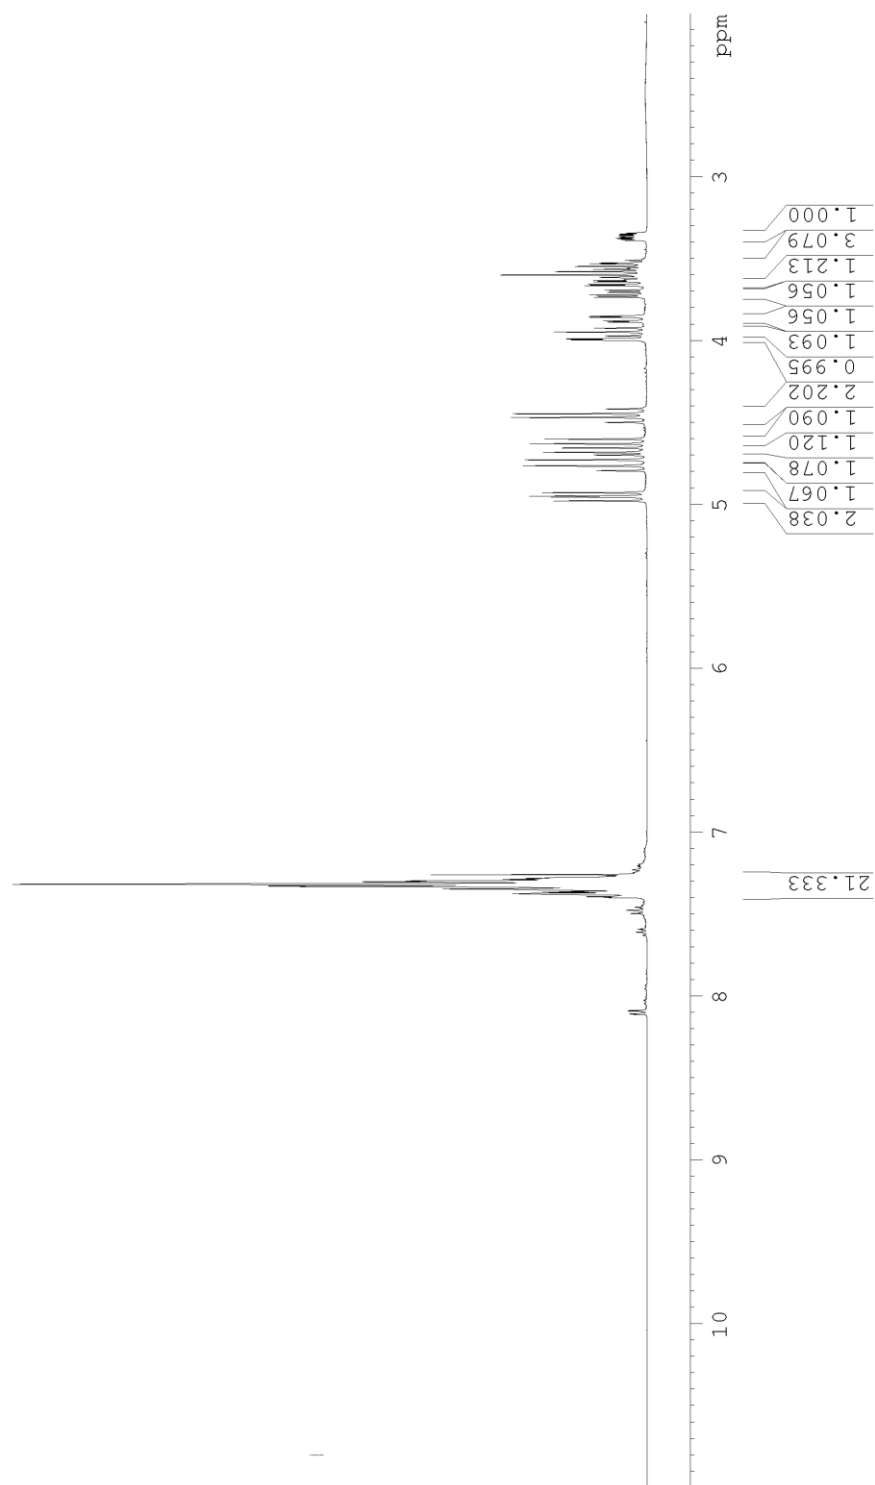

$^{13}\text{C}$ :

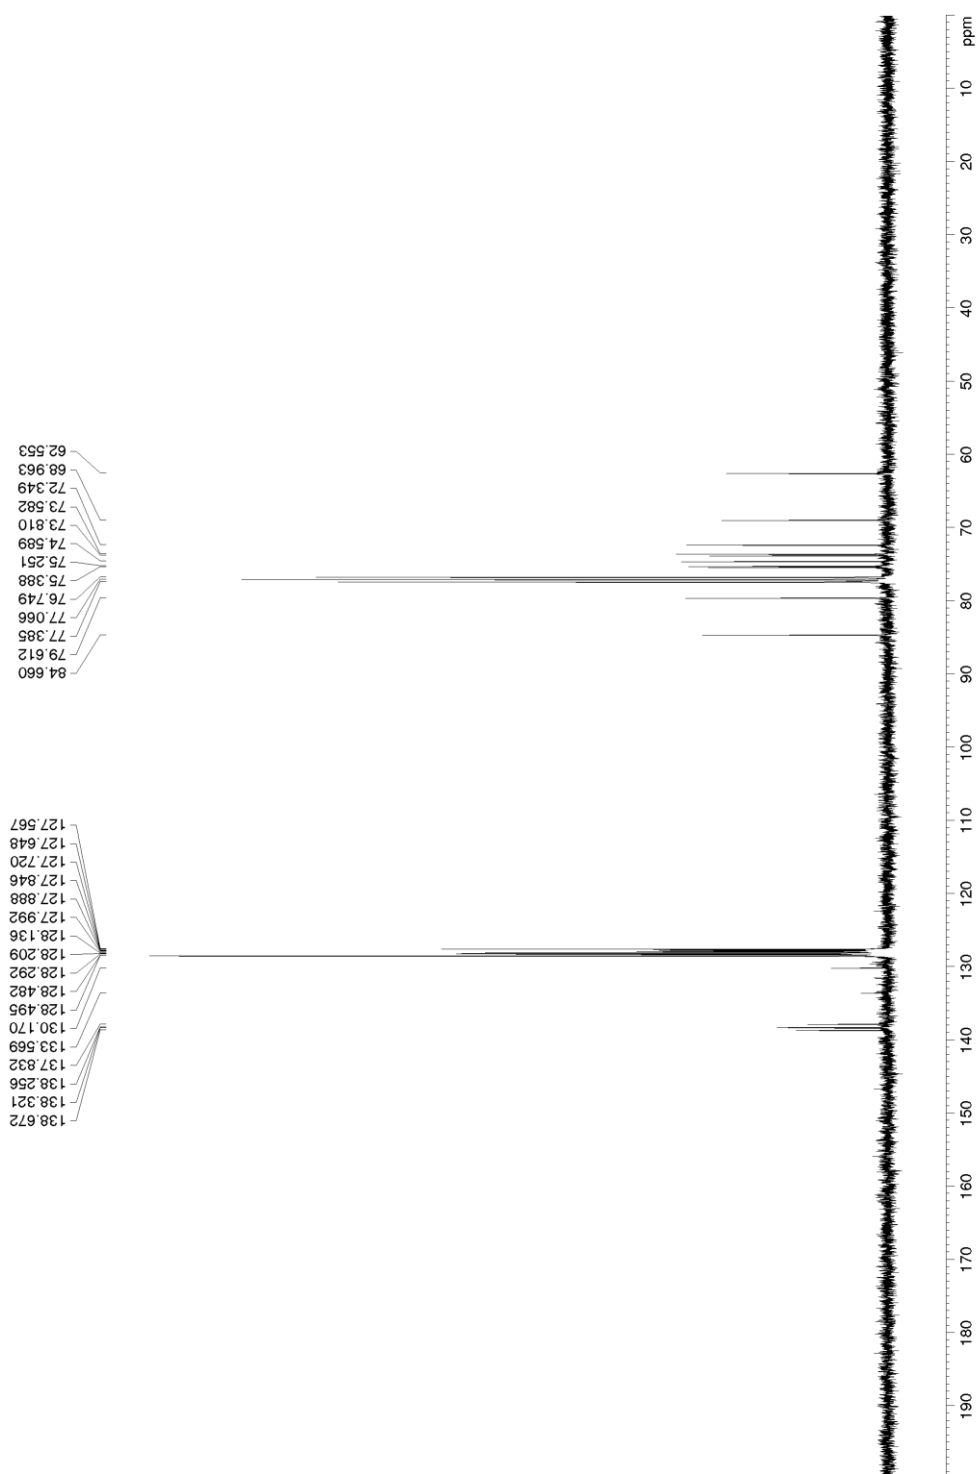

Compound **3** continued:

$^1\text{H}$  pyridine- $\text{d}_5$ :

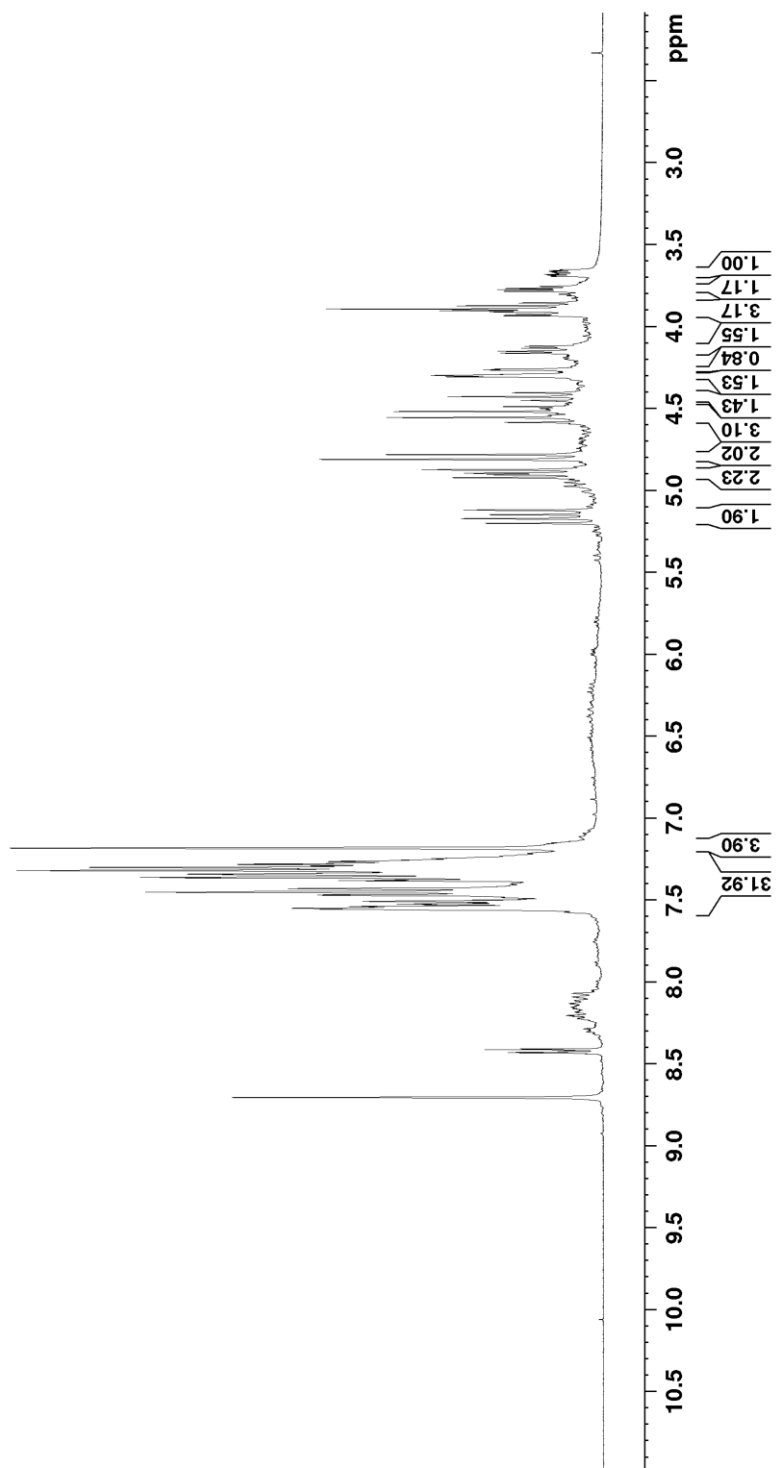



NOESY pyridine-d5:

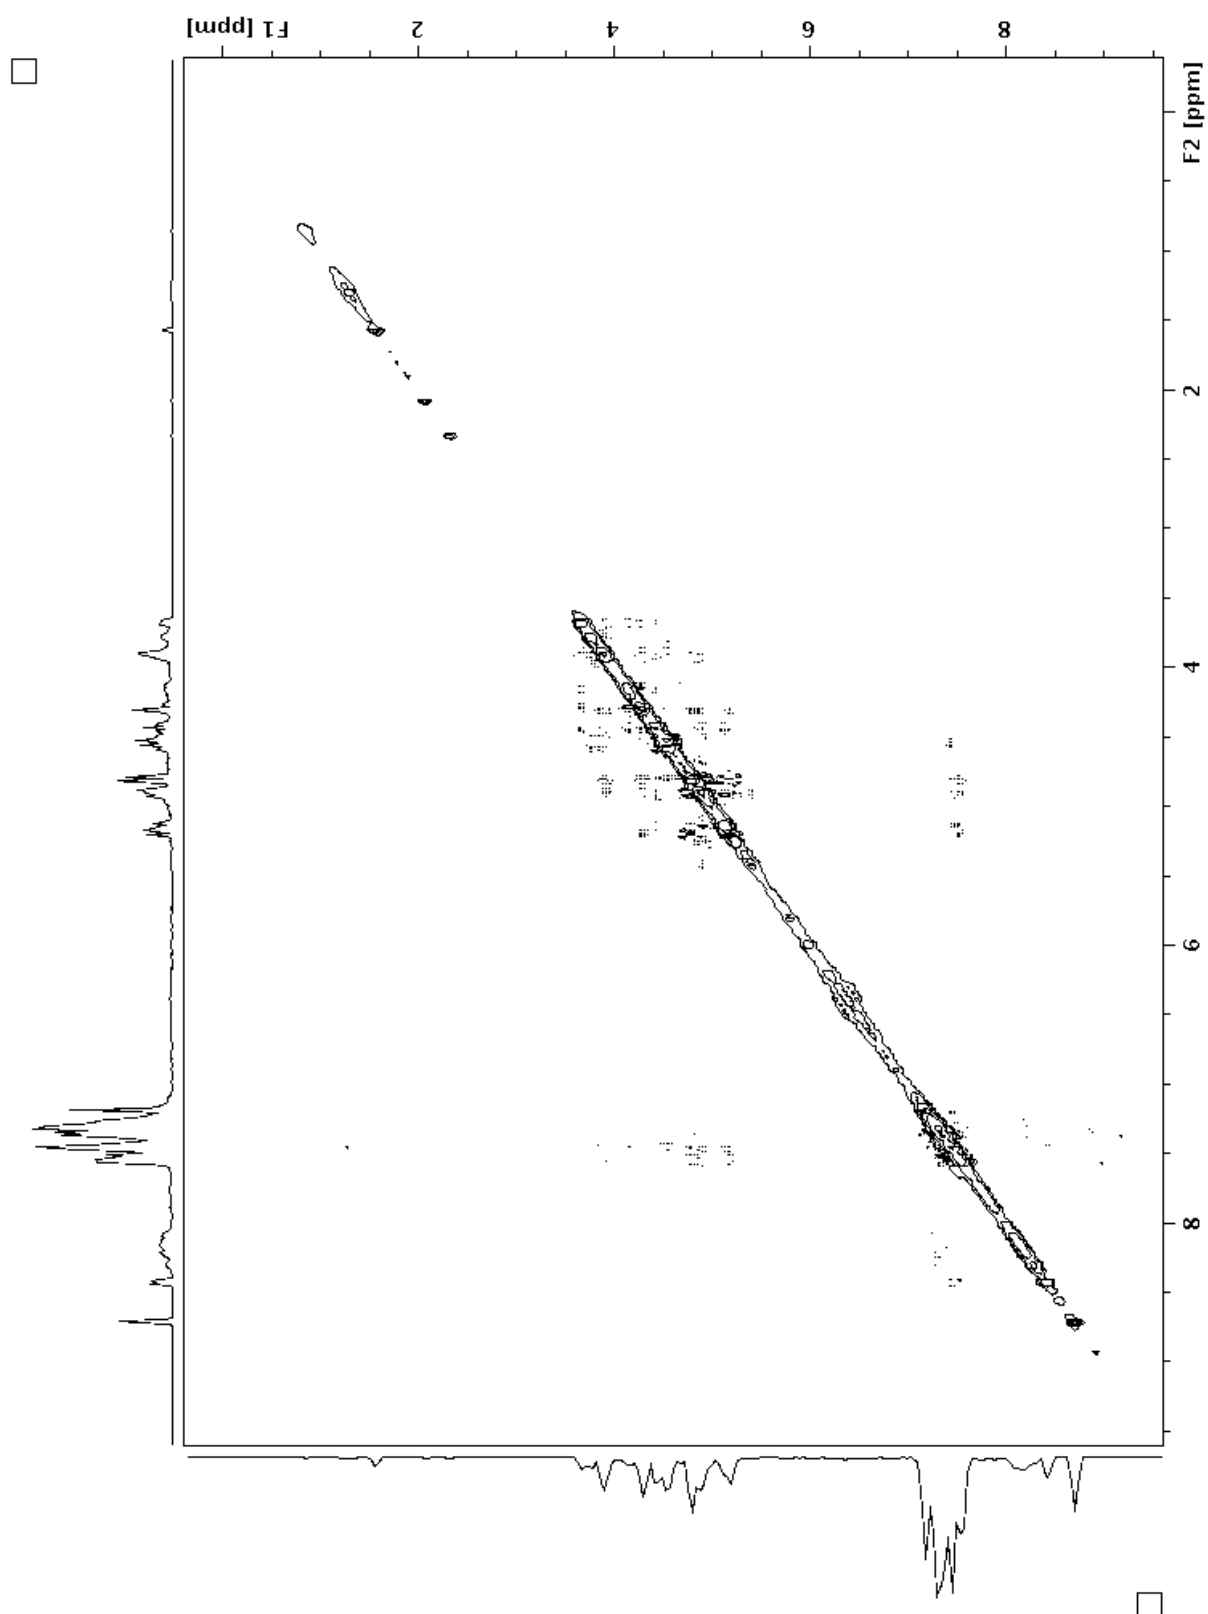

Compound **5**:

$^1\text{H}$ :

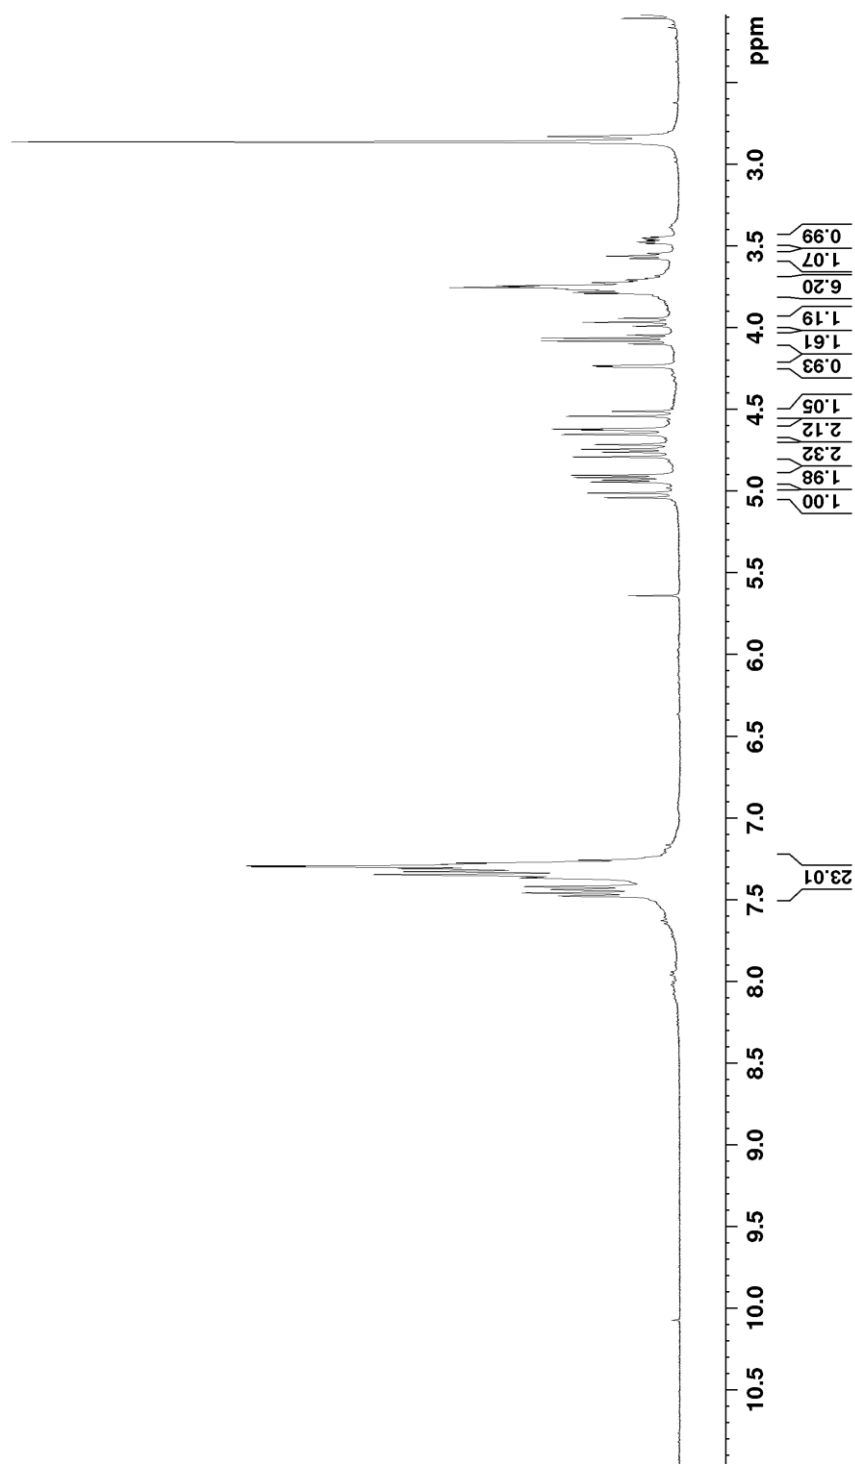

$^{13}\text{C}$ :

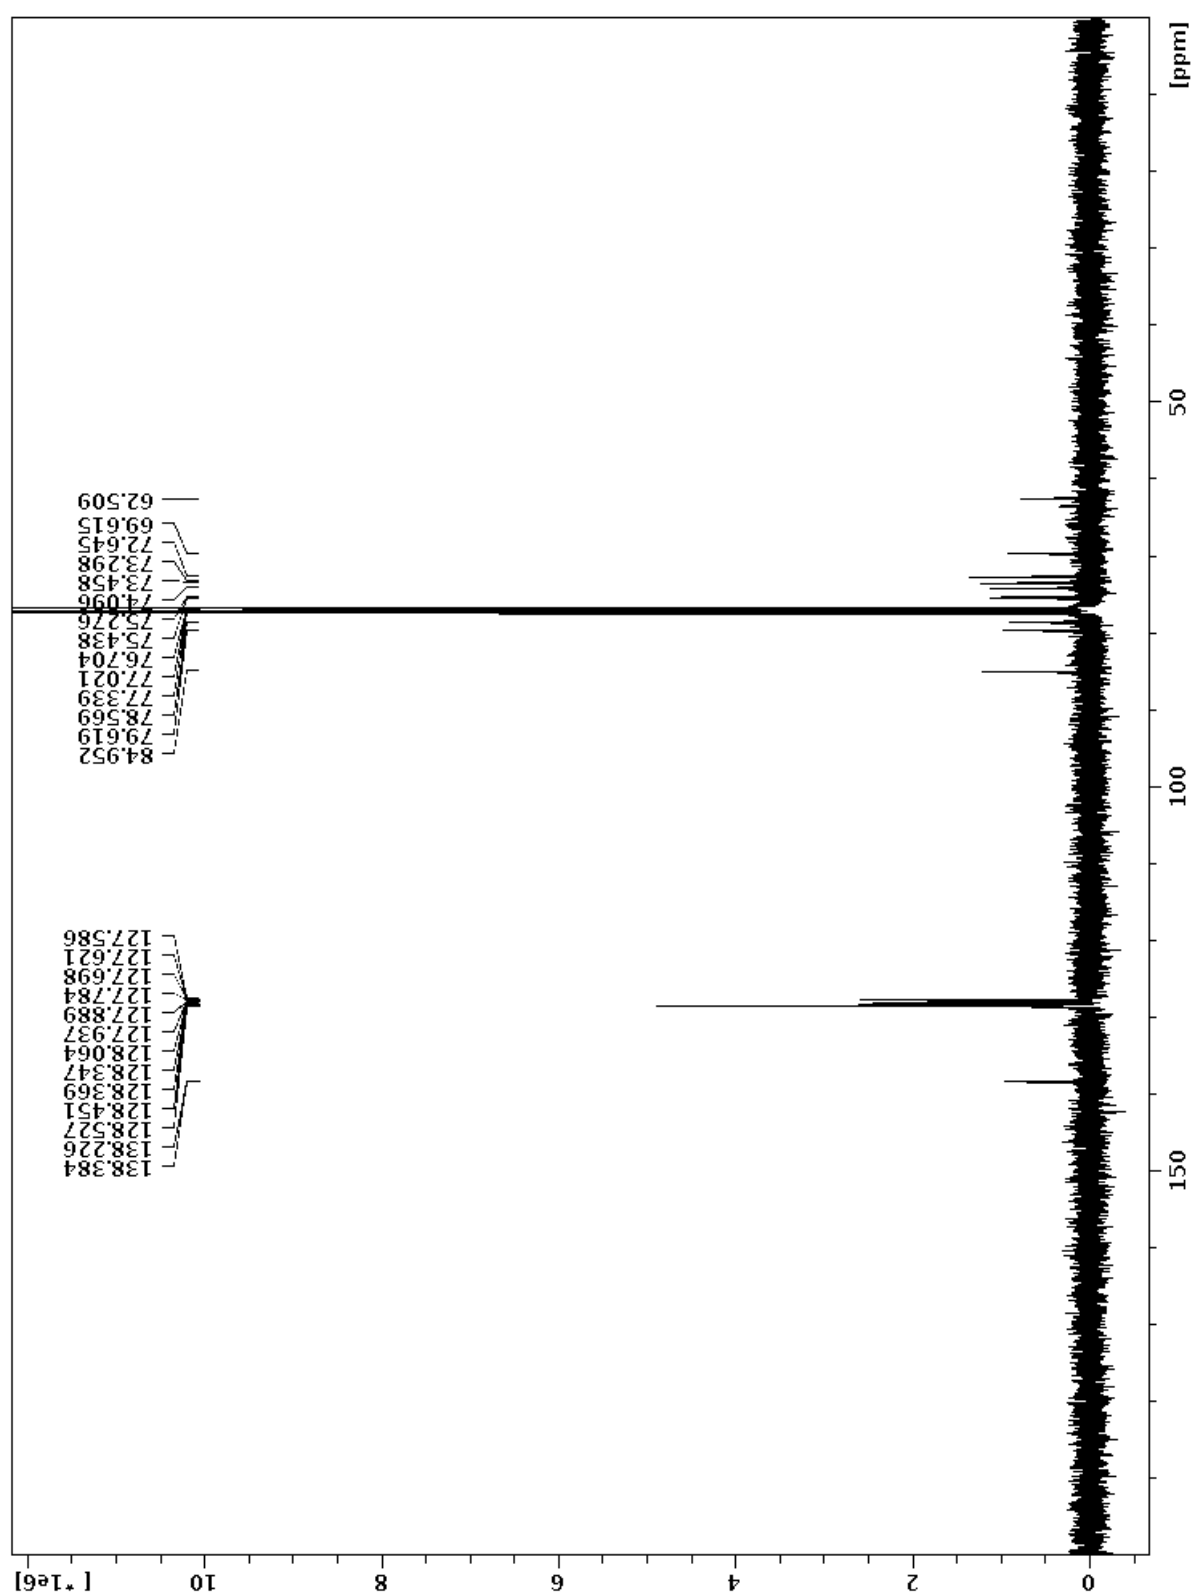

Compound **5** continued:

$^1\text{H}$  pyridine- $\text{d}_5$ :

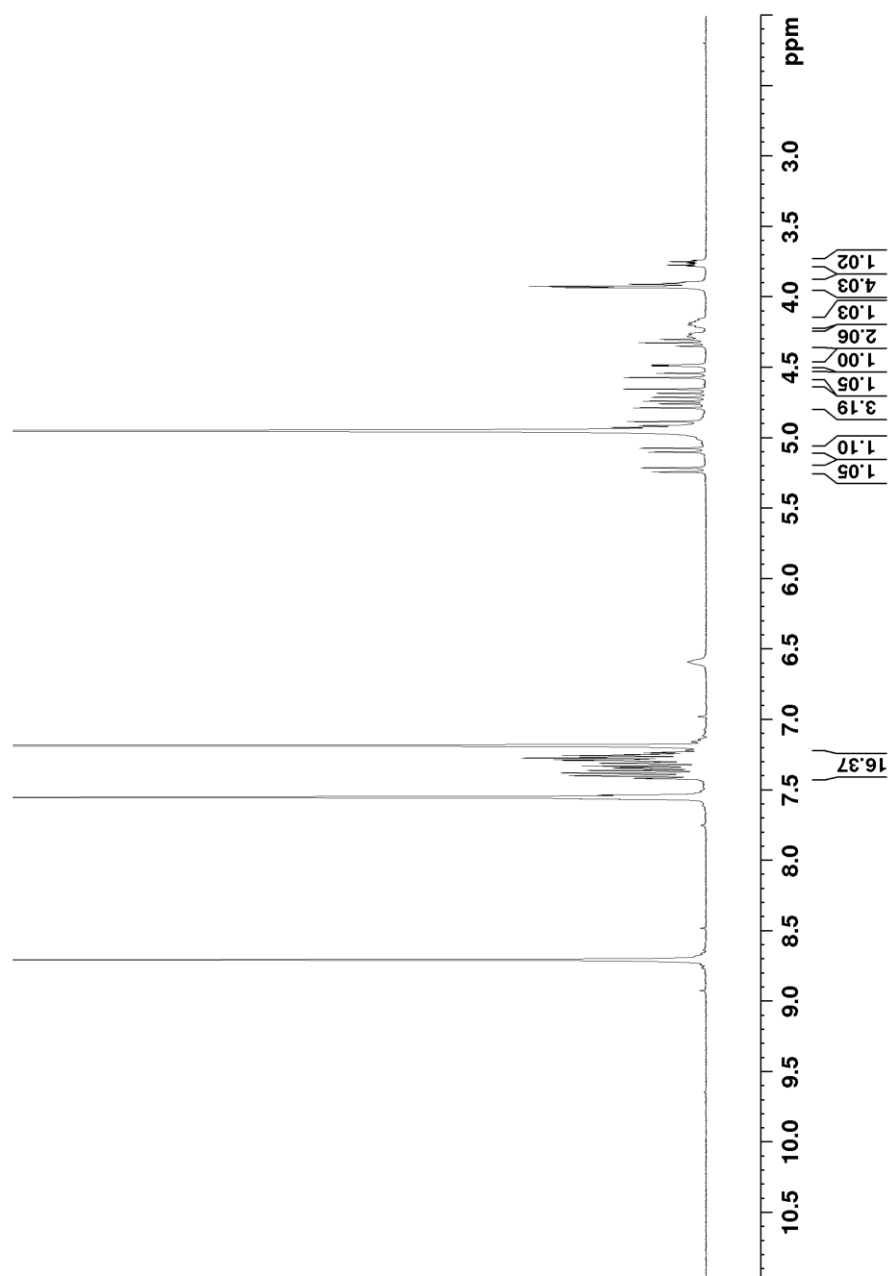

NOESY pyridine-d5:

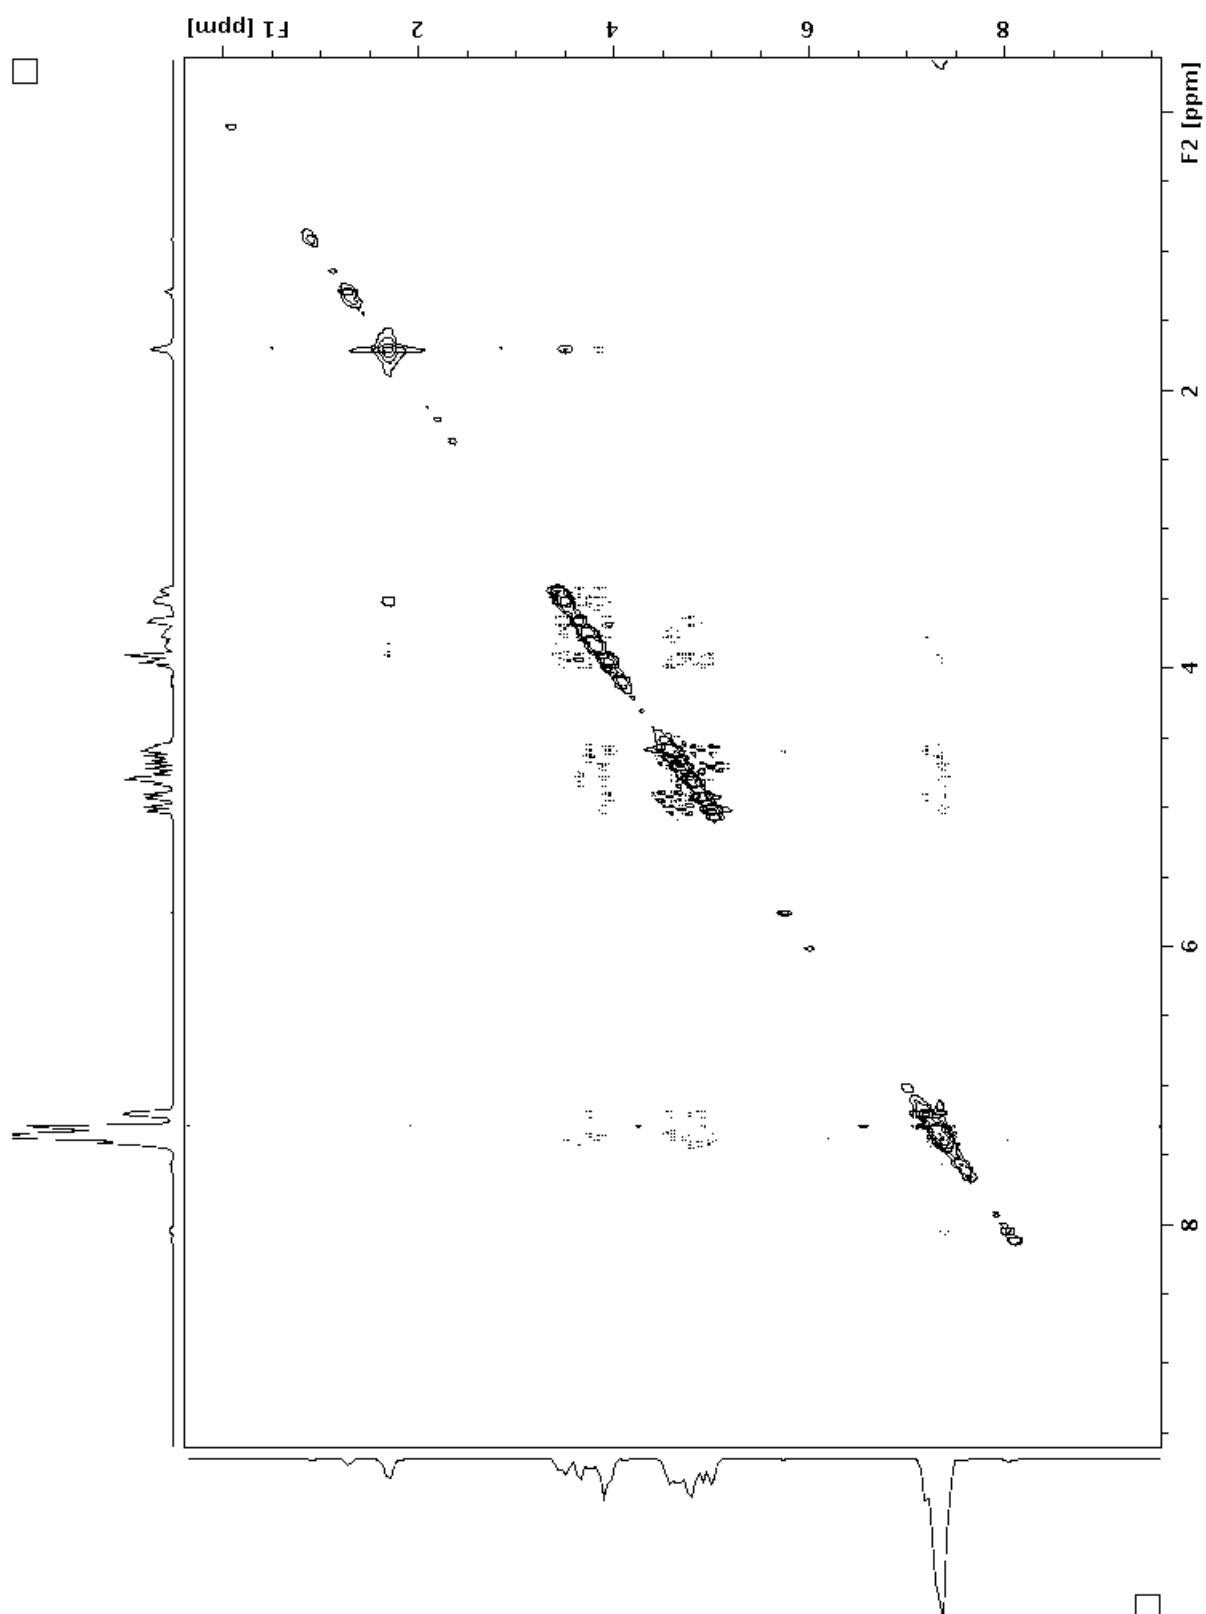

Compound  $\beta$ -7  
 $^1\text{H}$ :

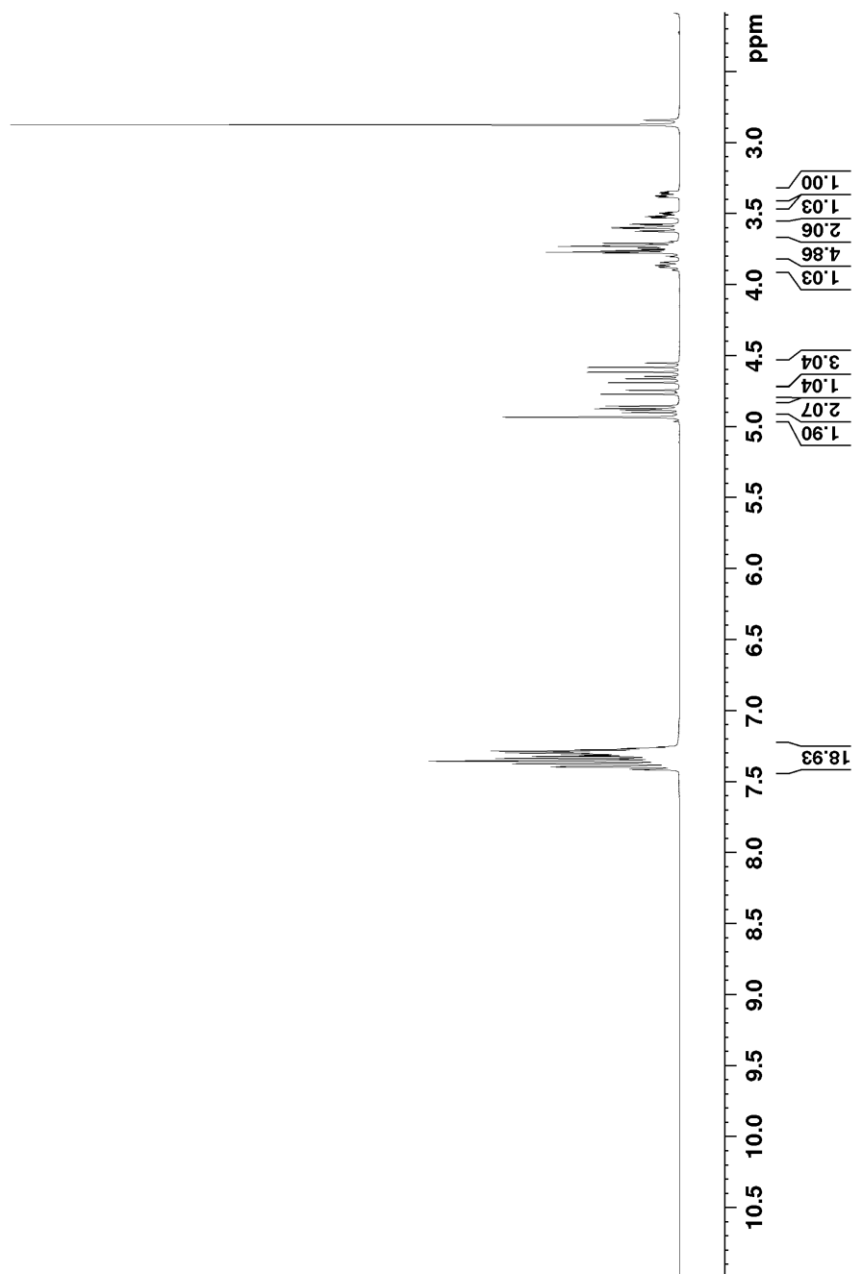

$^{13}\text{C}$ :

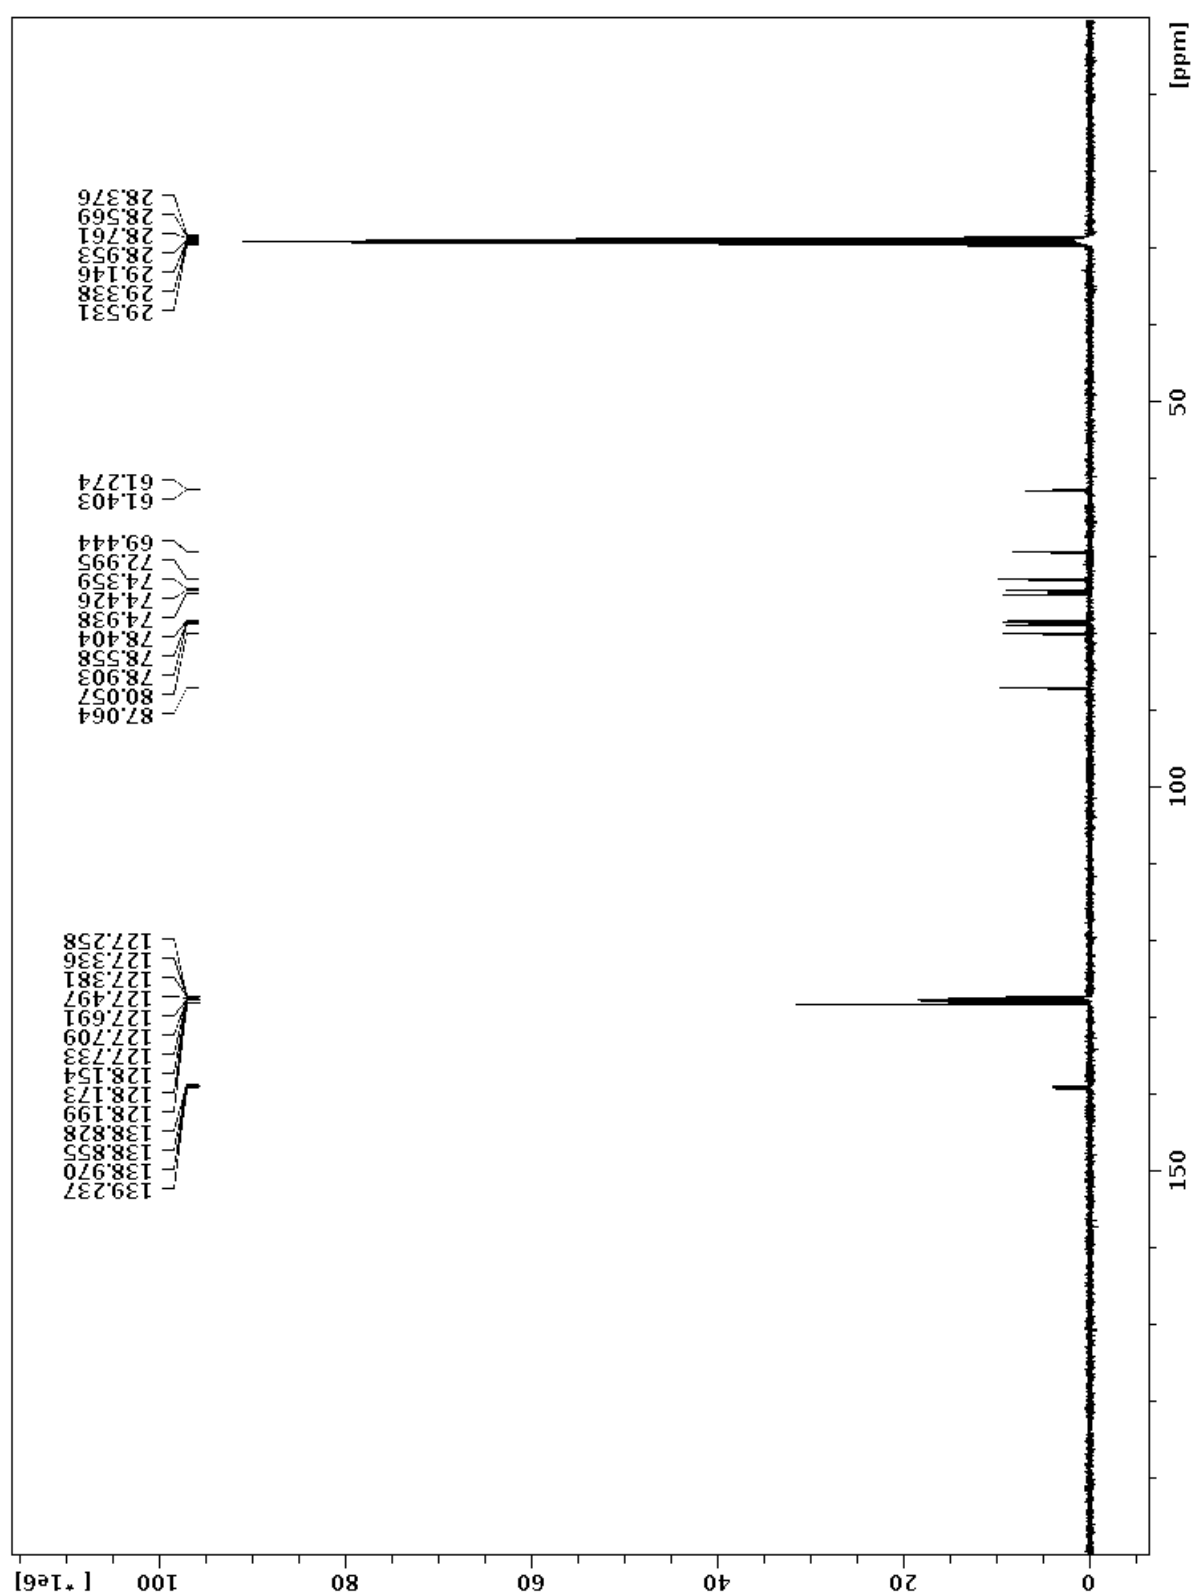

Compound  $\beta$ -7  
 $^1\text{H}$  pyridine- $d_5$

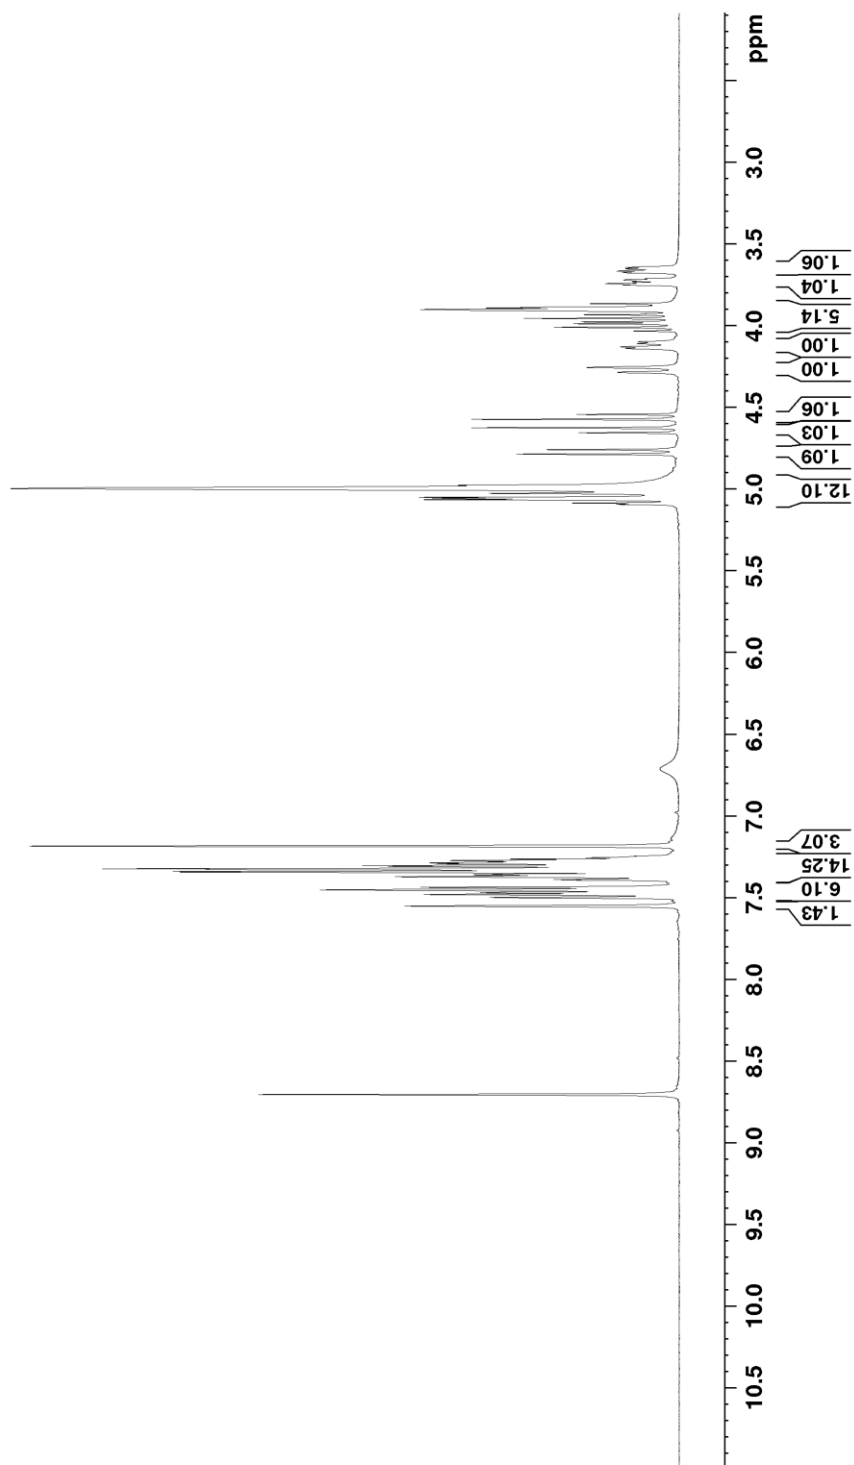



NOESY pyridine-d5:

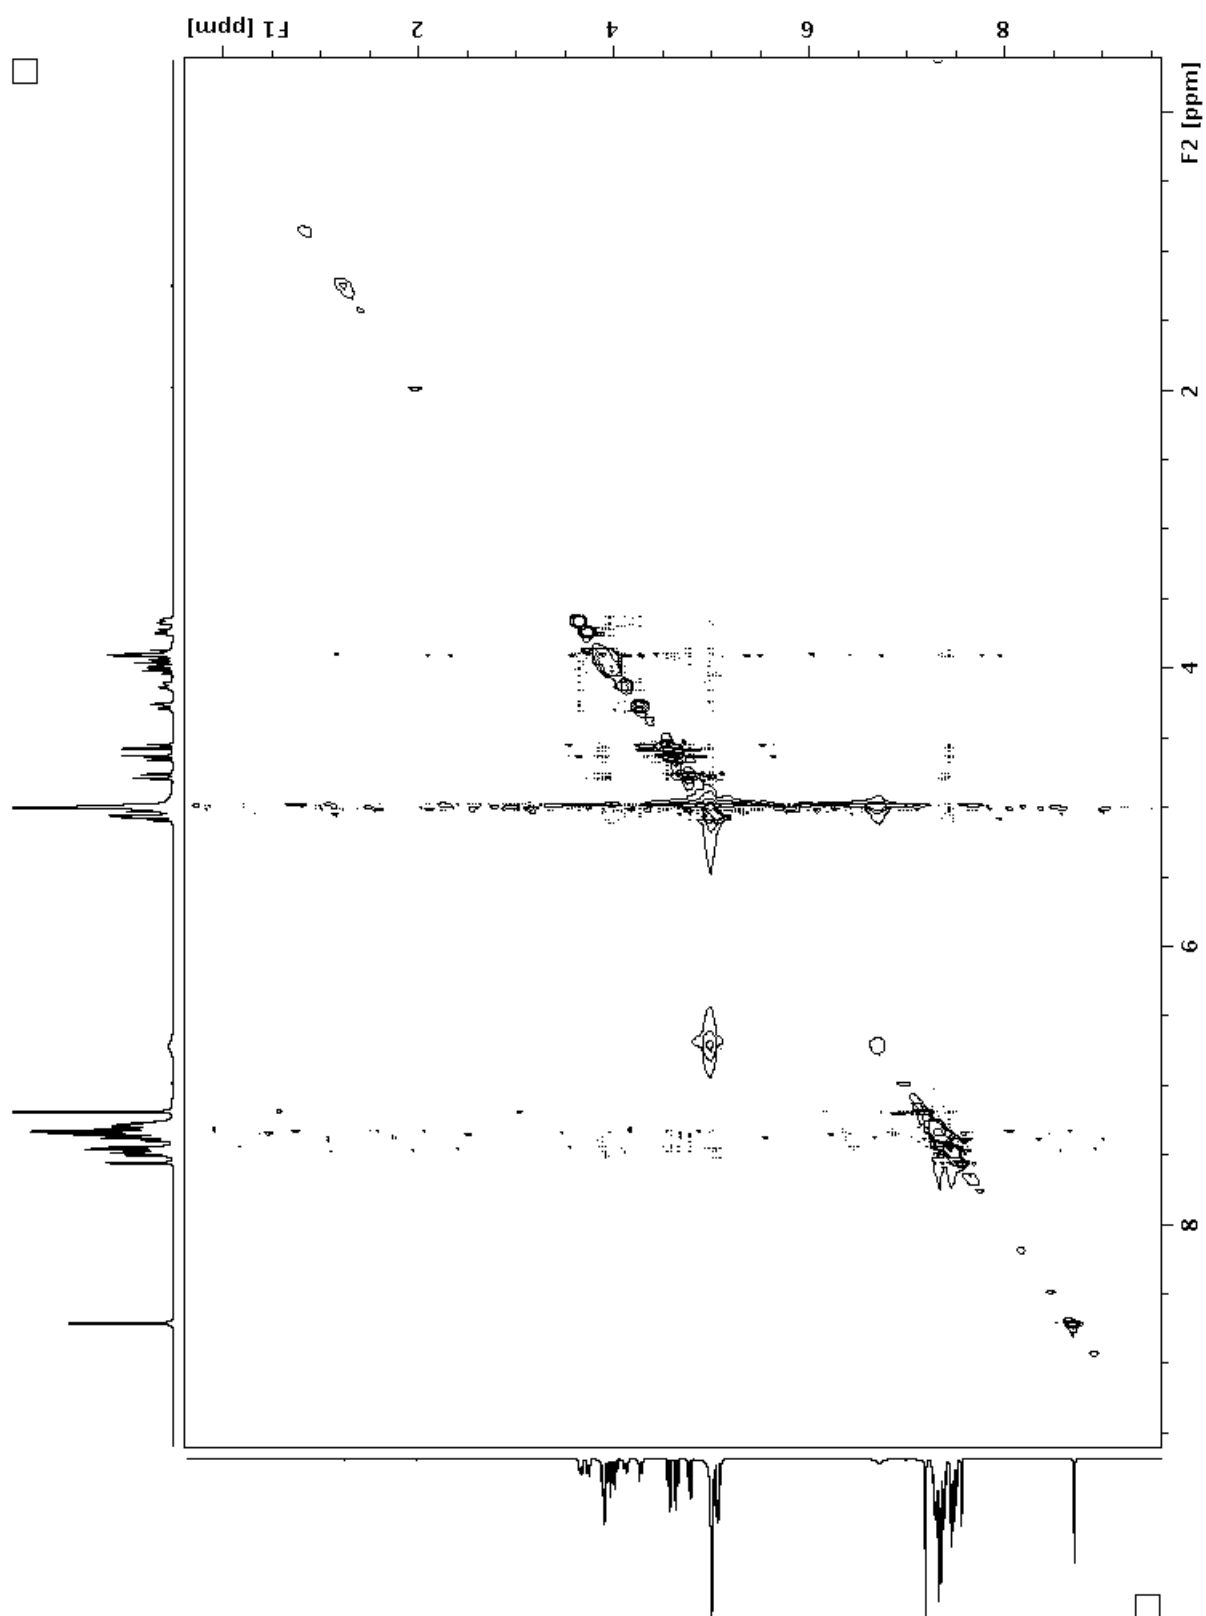

Compound  $\alpha$ -7  
 $^1\text{H}$ :

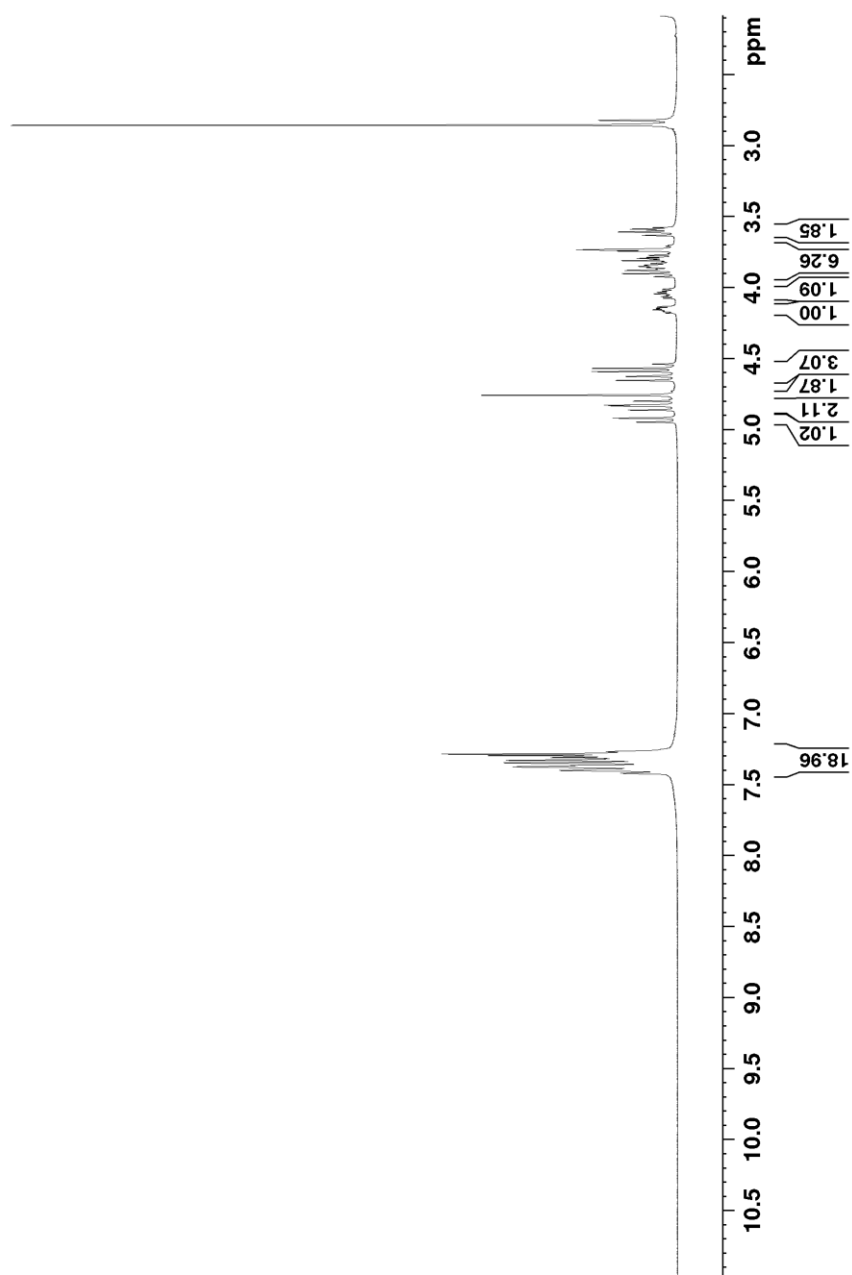

$^{13}\text{C}$ :

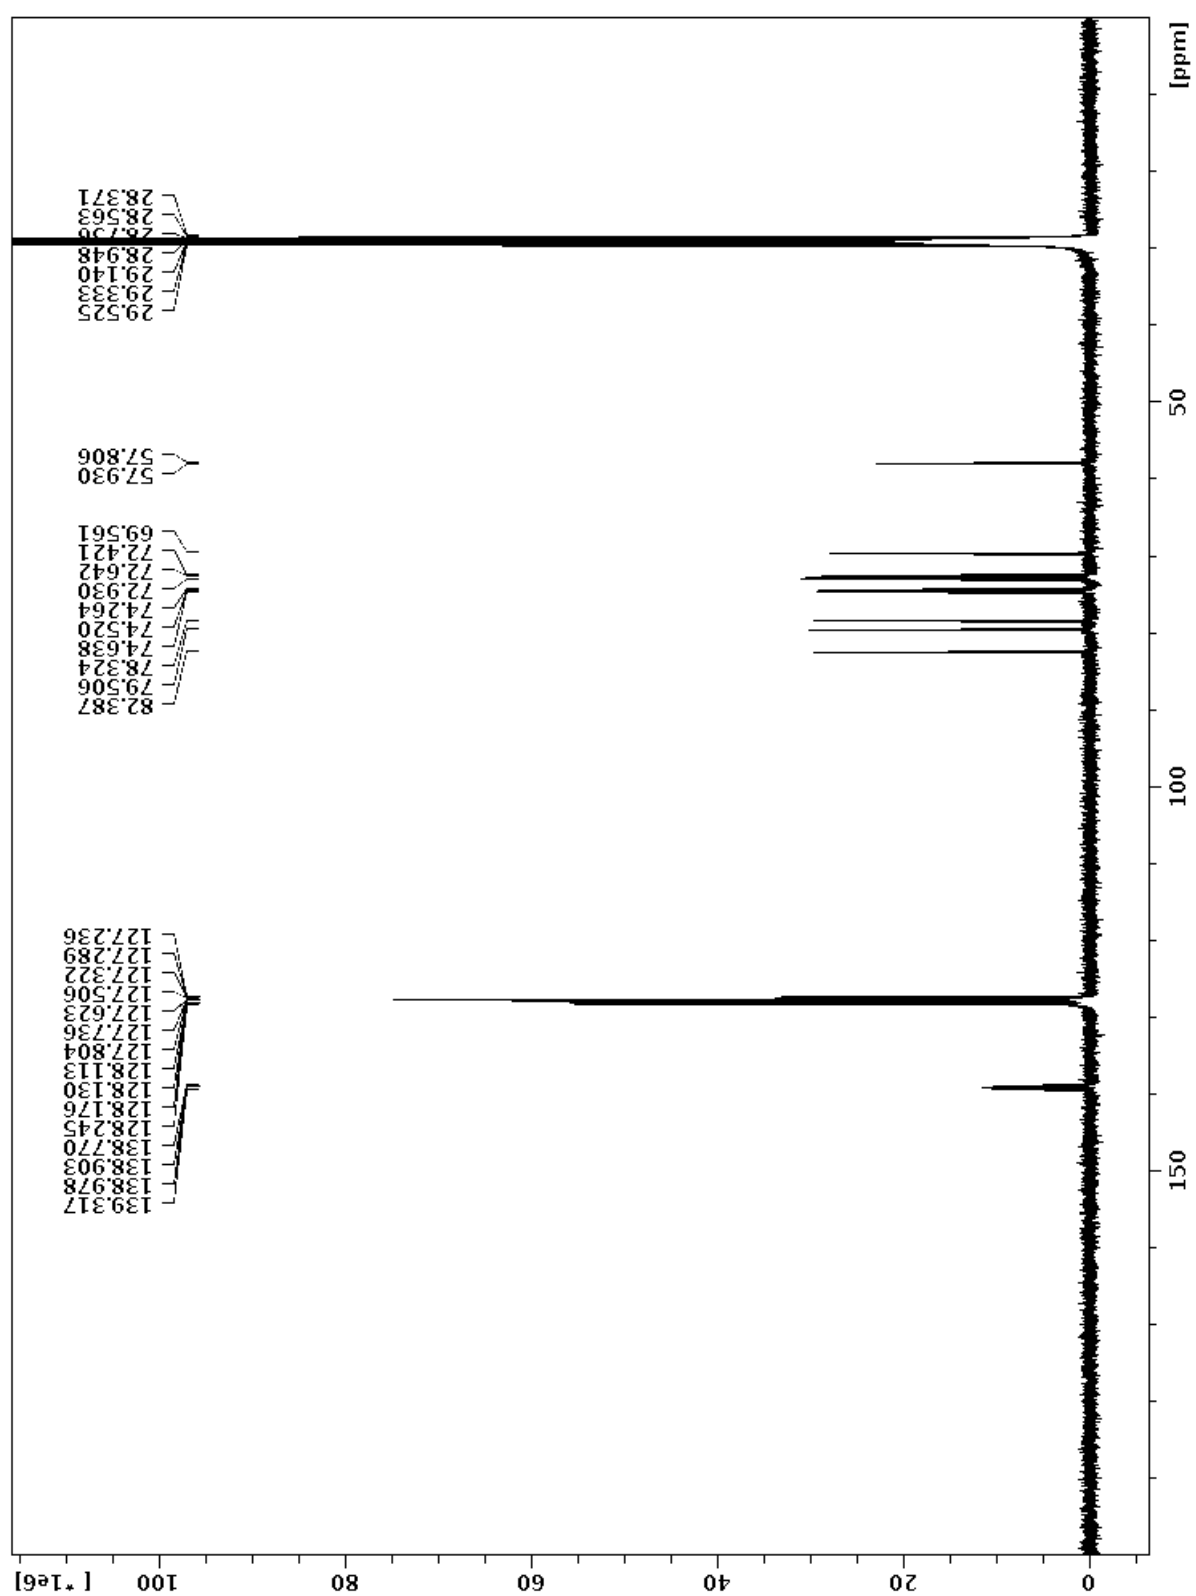

Compound  $\beta$ -7  
 $^1\text{H}$  pyridine- $d_5$ :

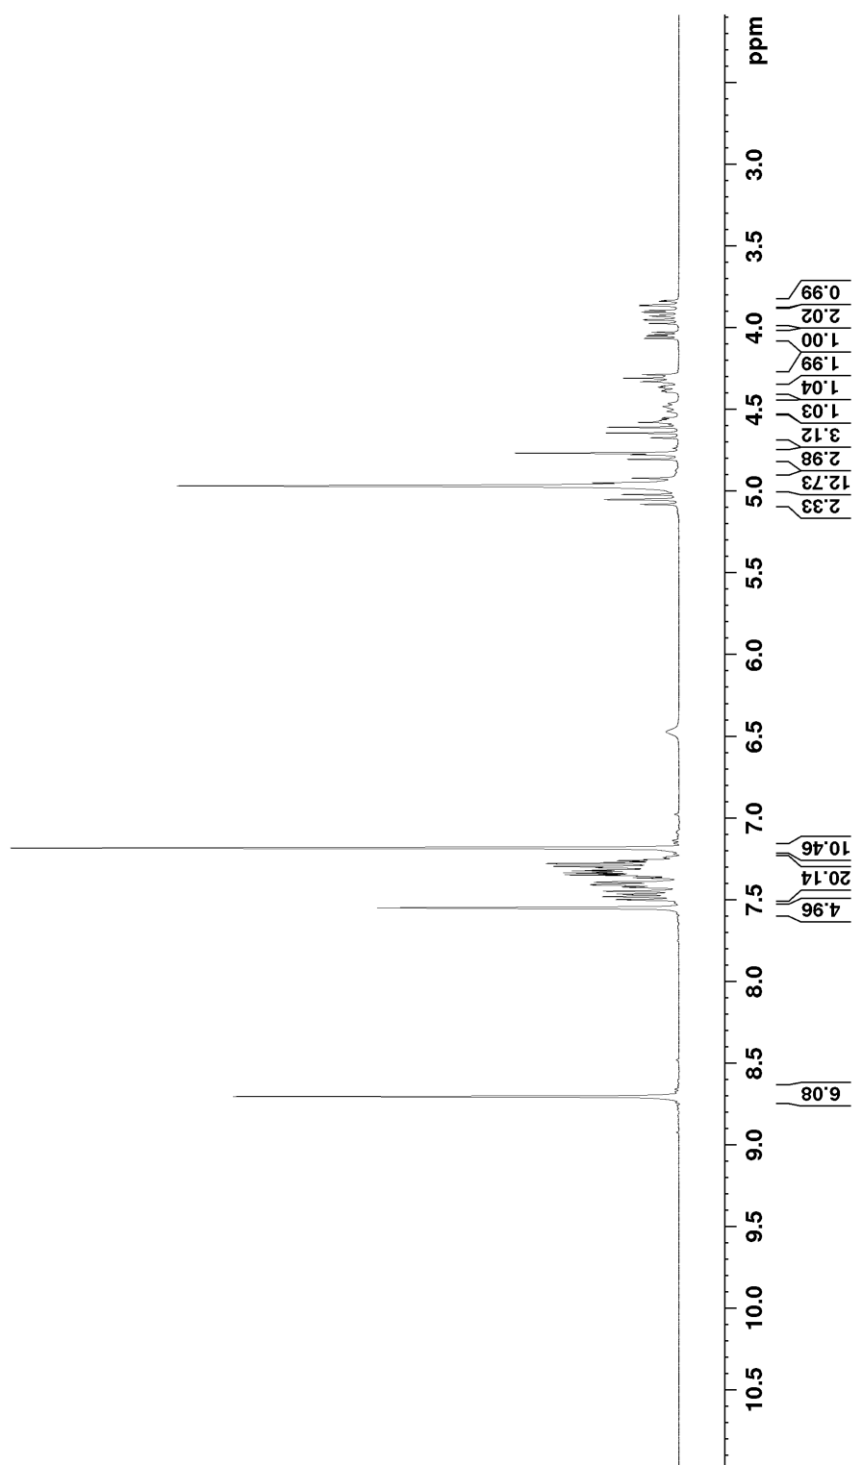

NOESY pyridine-d5:

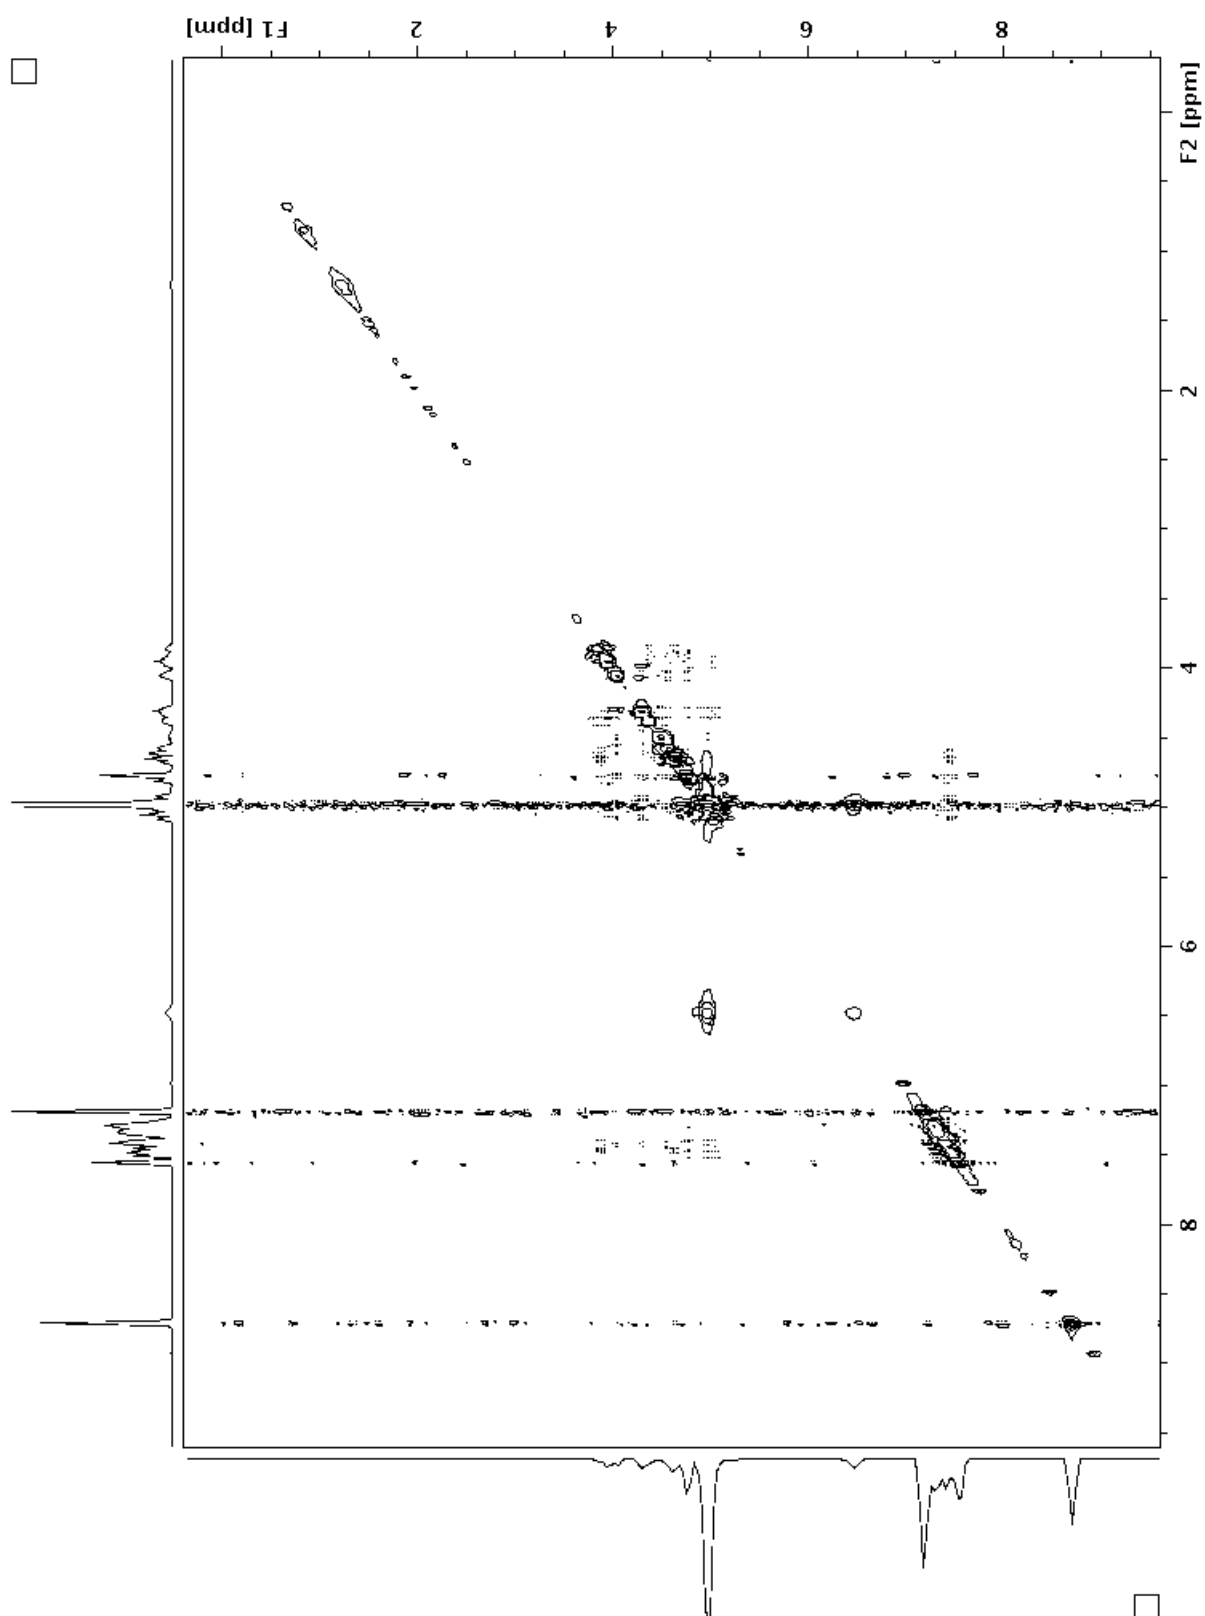

Compound **8**:

$^1\text{H}$ :

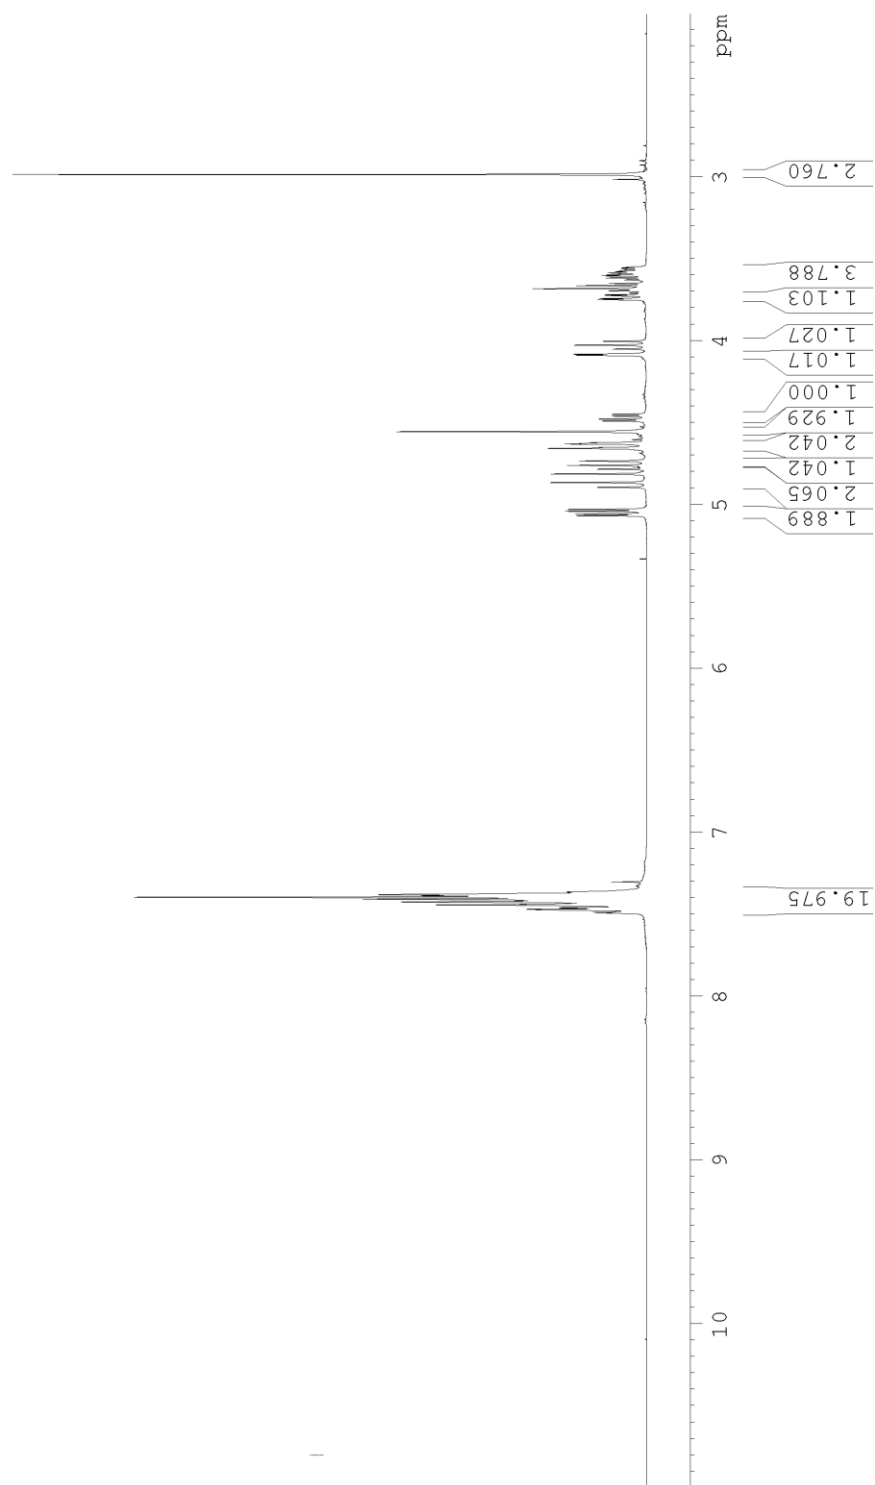

$^{13}\text{C}$ :

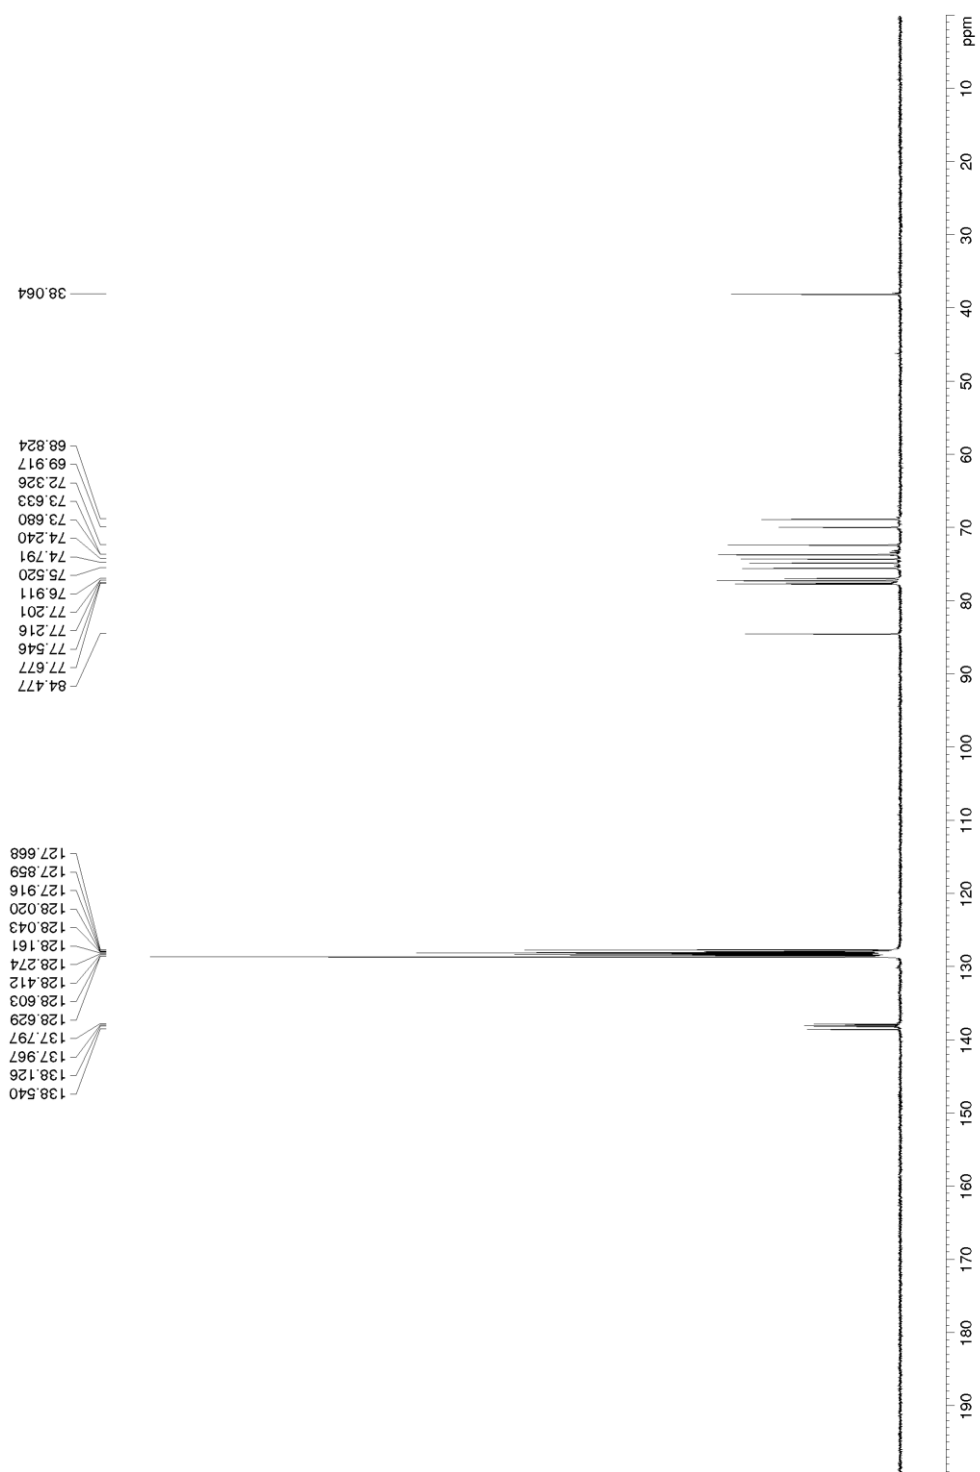

Compound **9**:

$^1\text{H}$ :

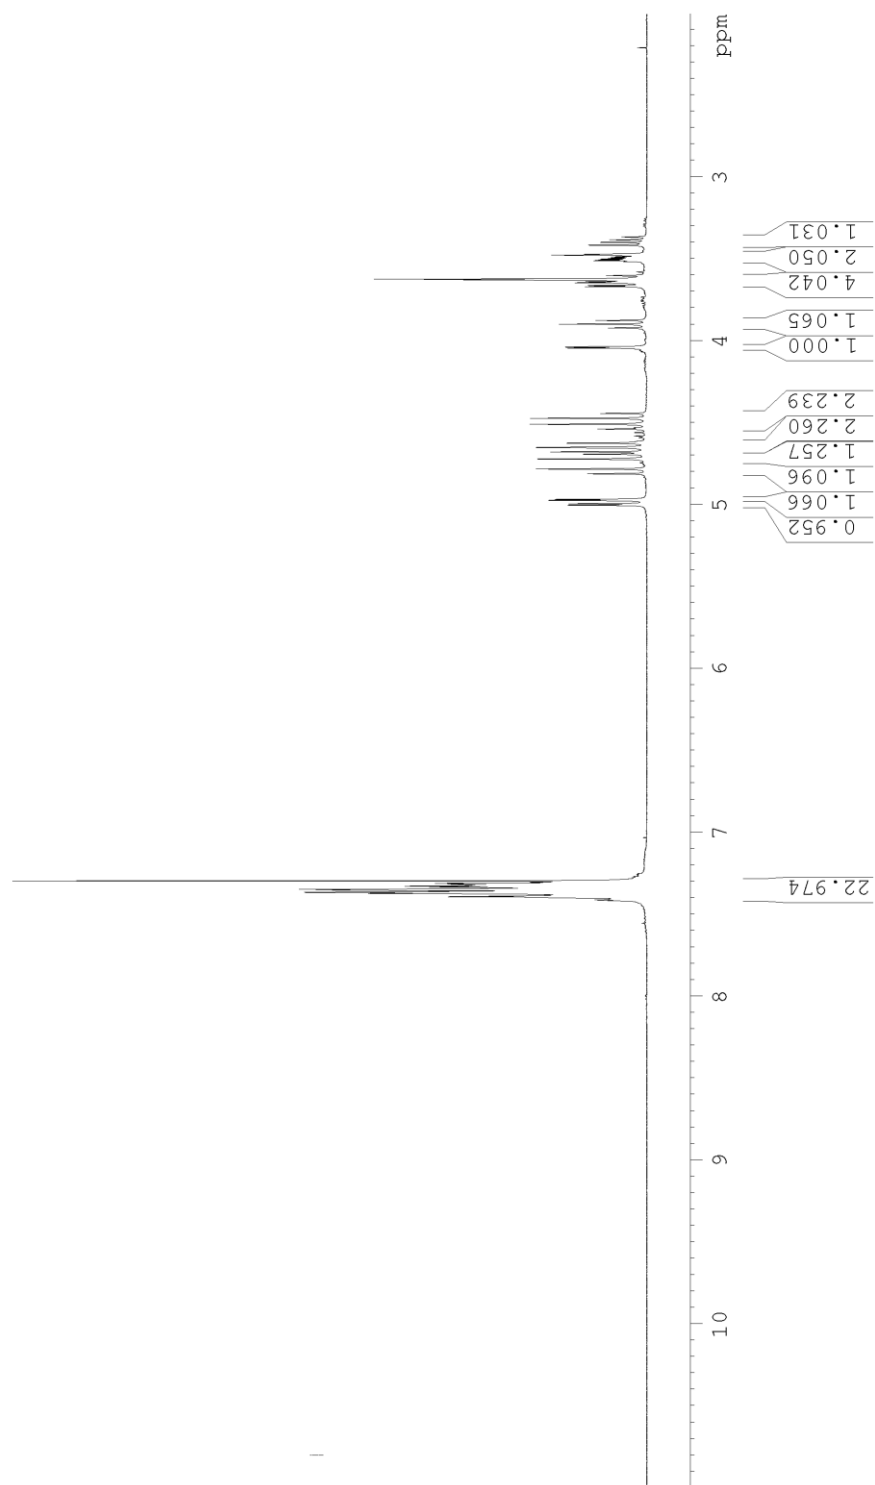

ppm



$^{13}\text{C}$ :

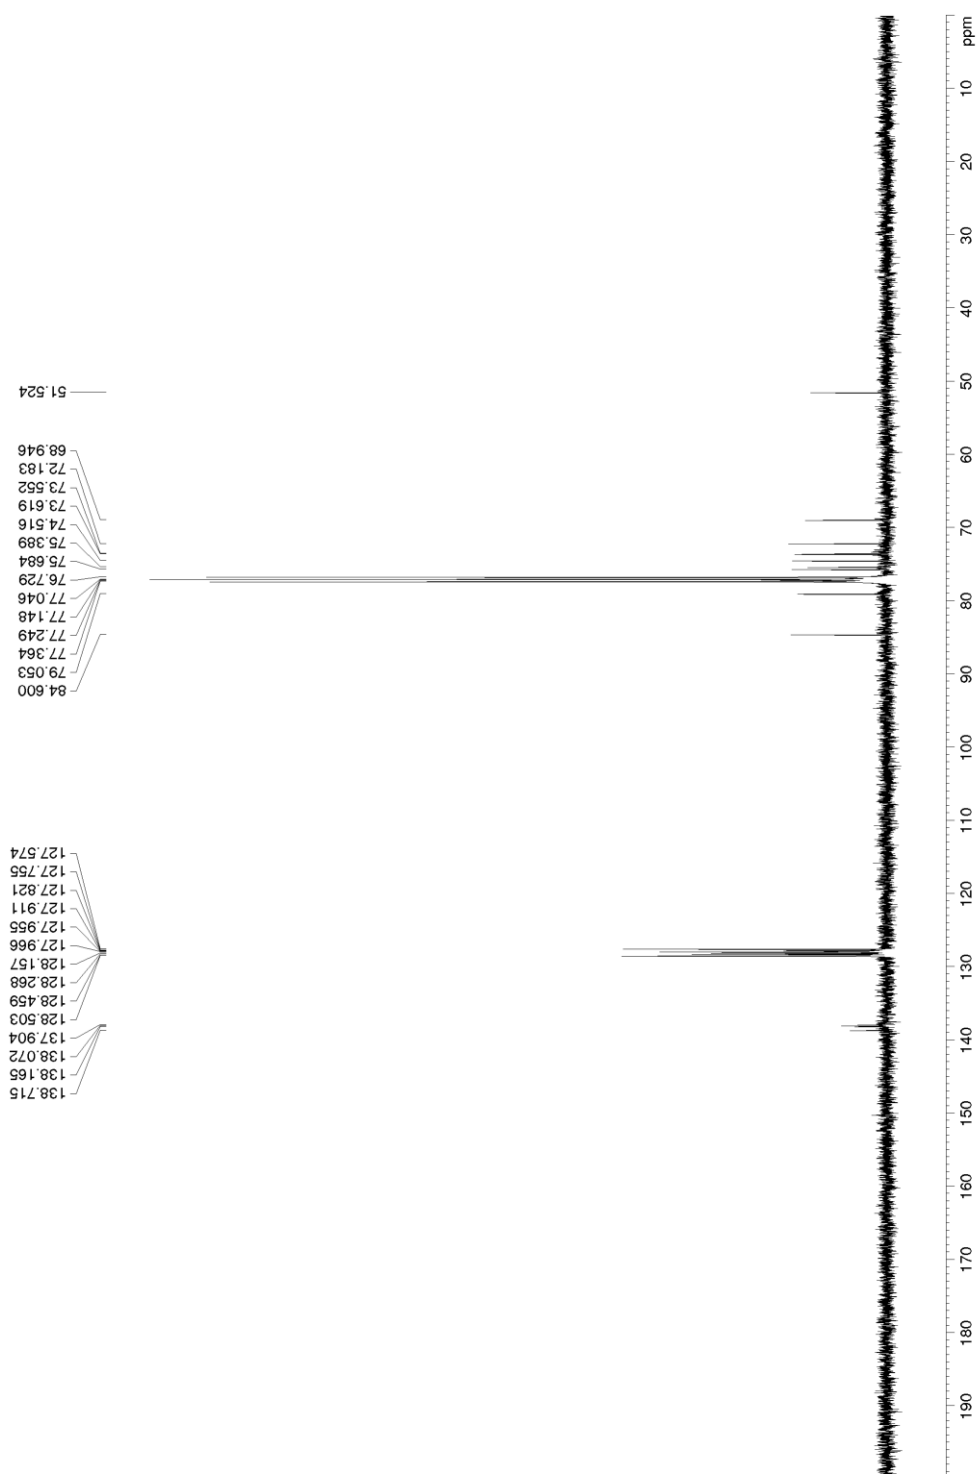

Compound **10a**:

$^1\text{H}$ :

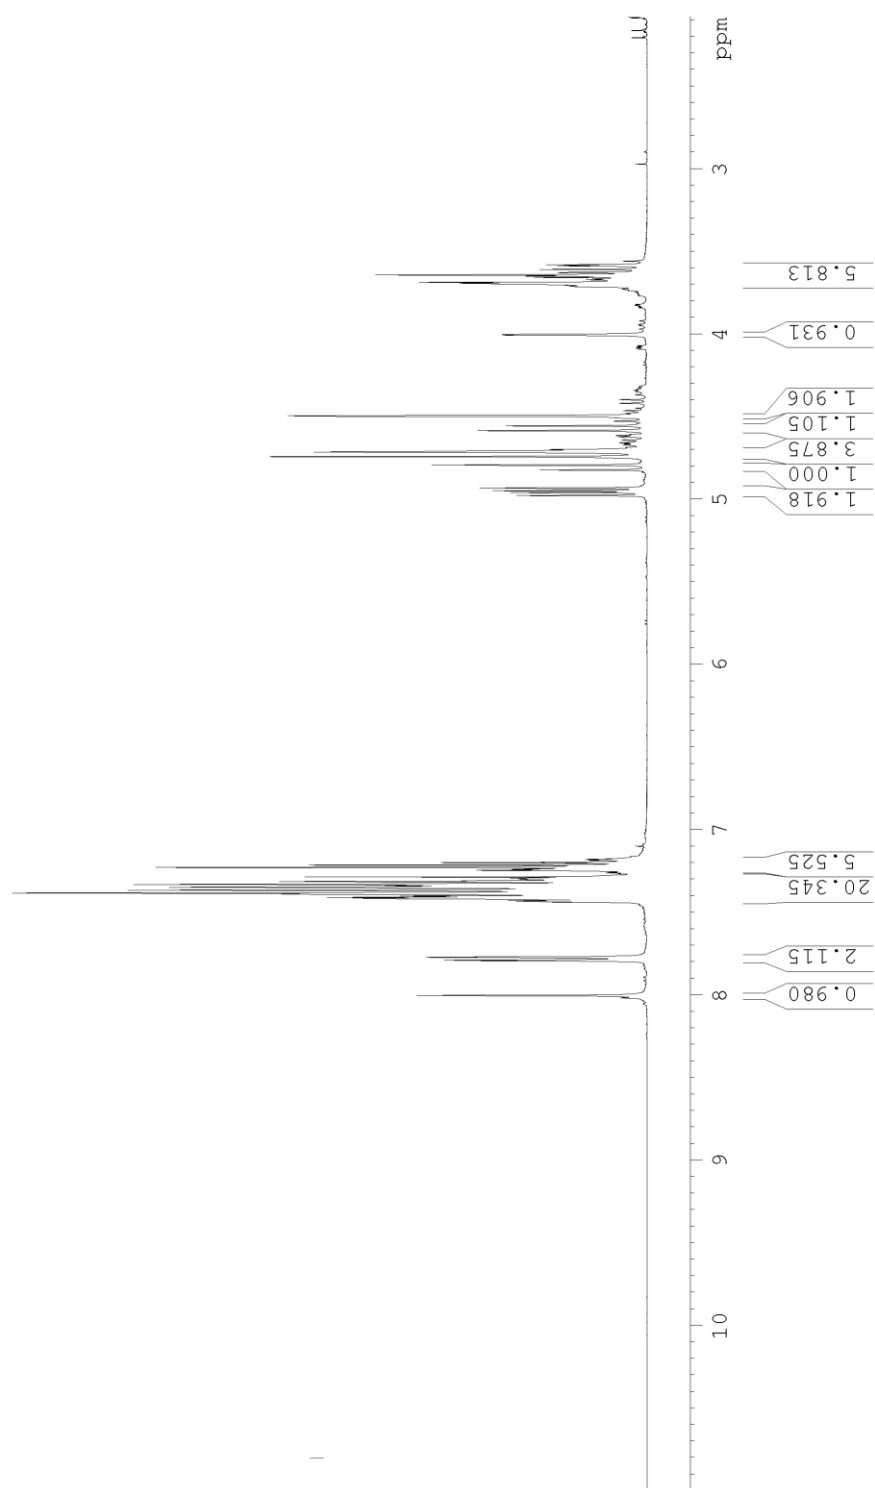

ppm

$^{13}\text{C}$ :

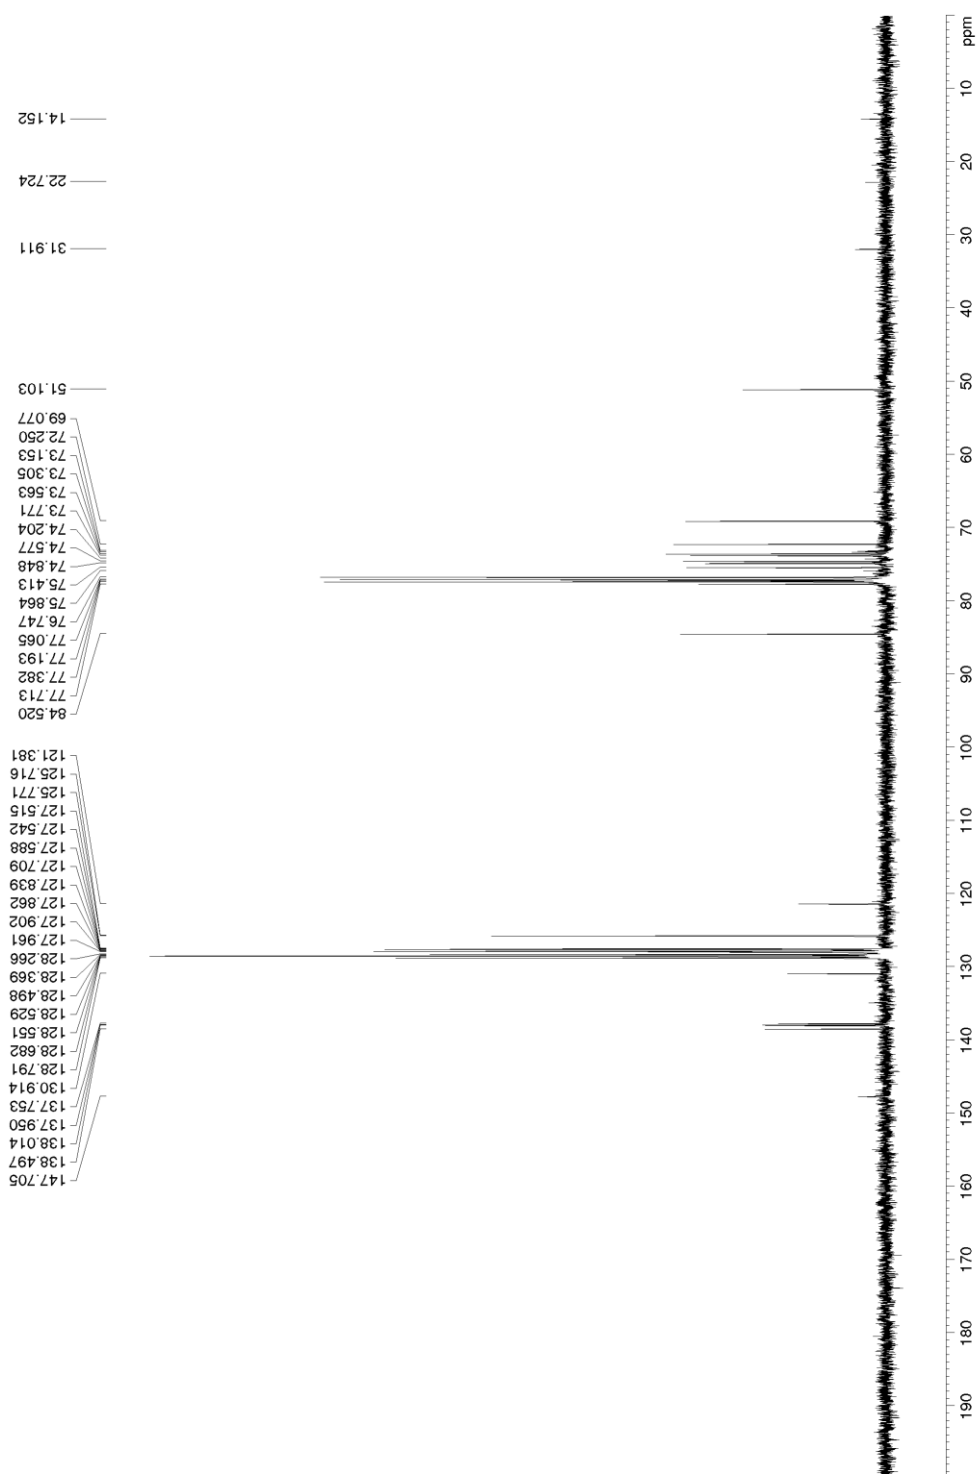

Compound **10b**:

$^1\text{H}$ :

ppm

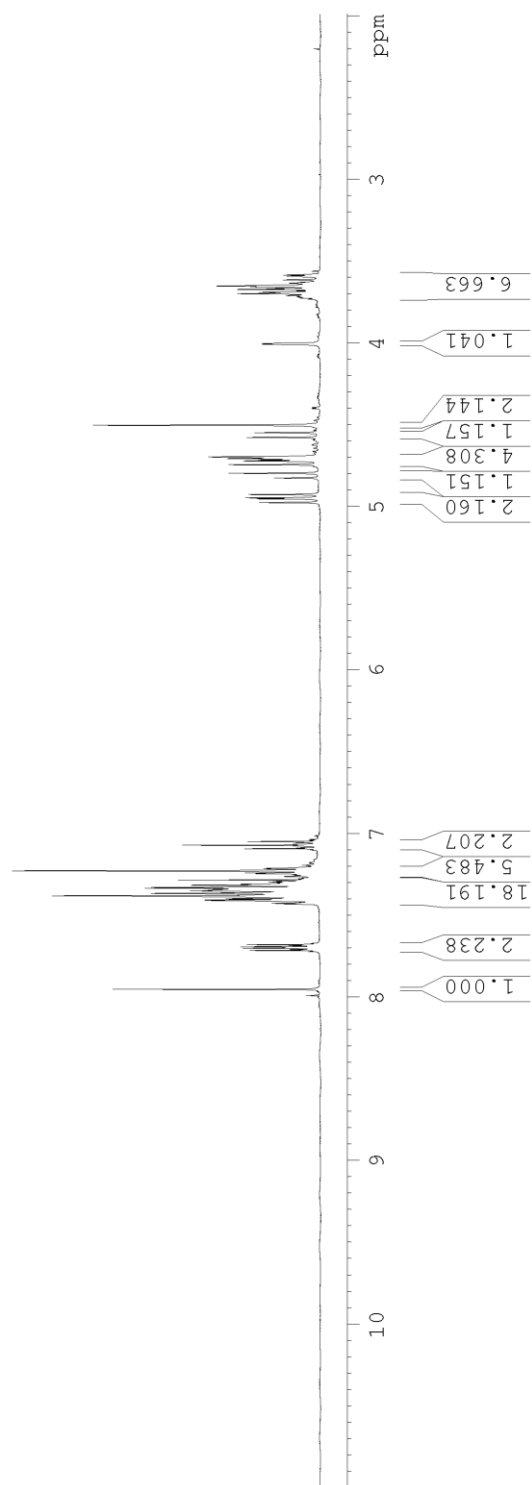

$^{13}\text{C}$ :

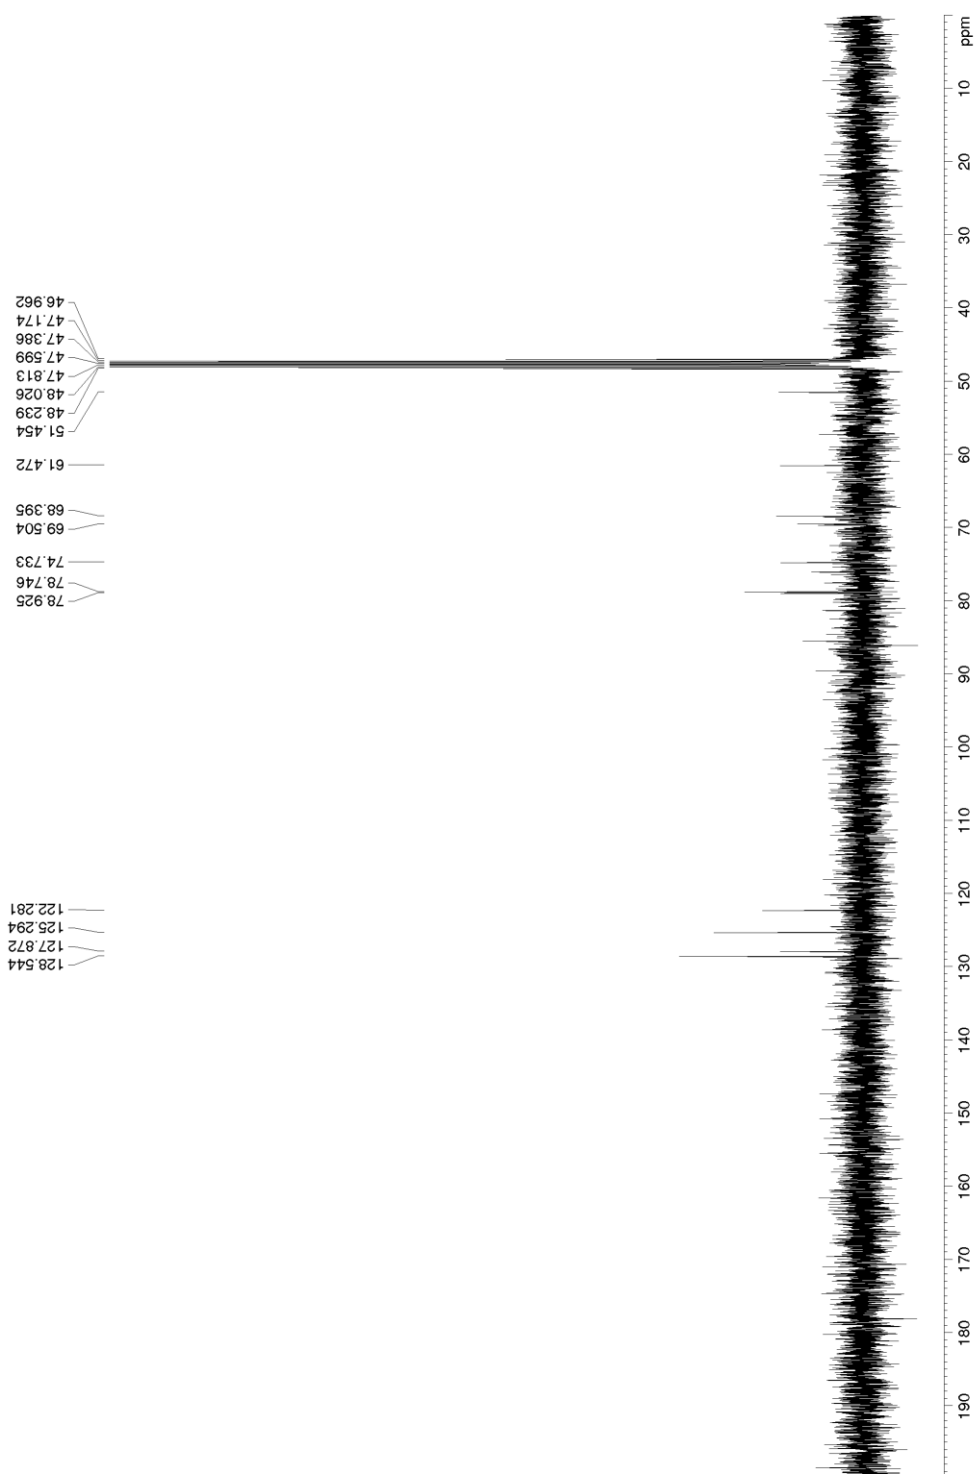

Compound **10c**:

$^1\text{H}$ :

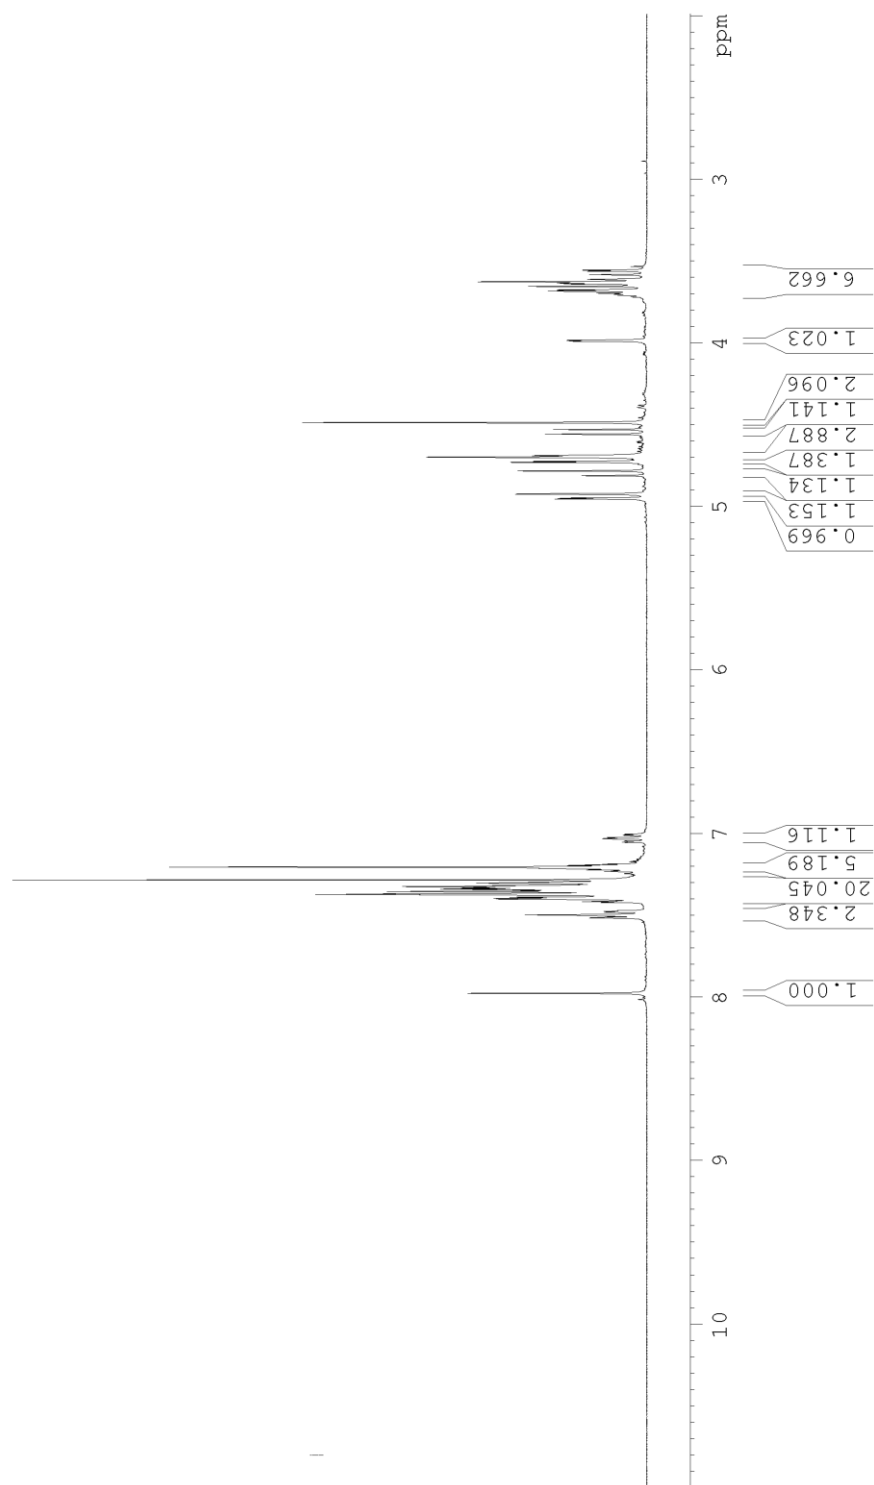

$^{13}\text{C}$ :

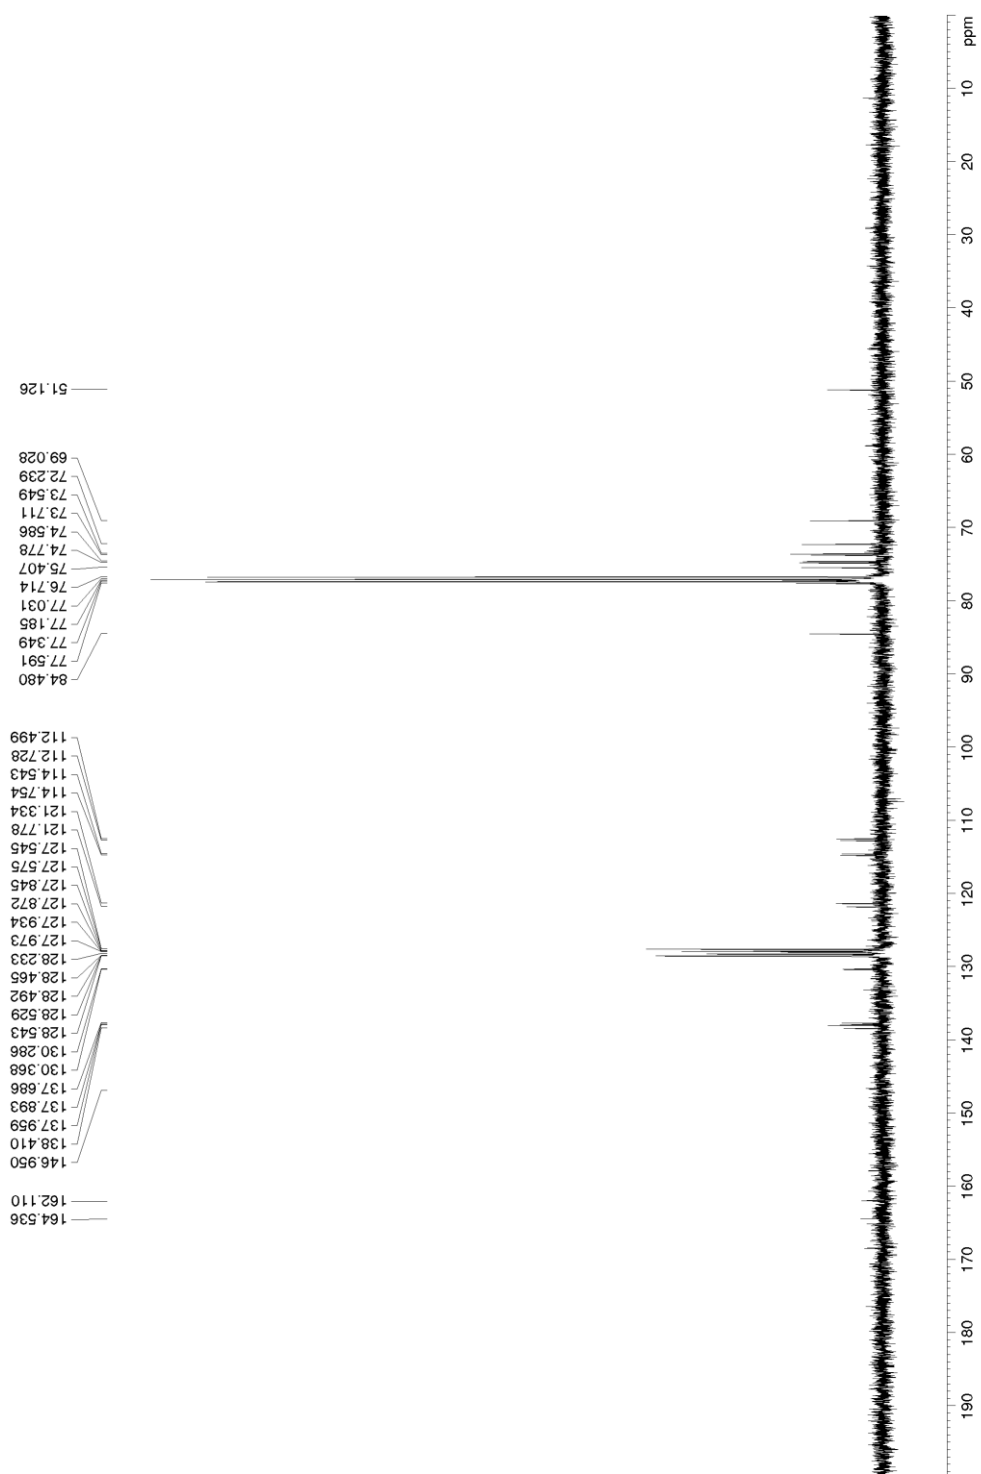

Compound **10d**:

$^1\text{H}$ :

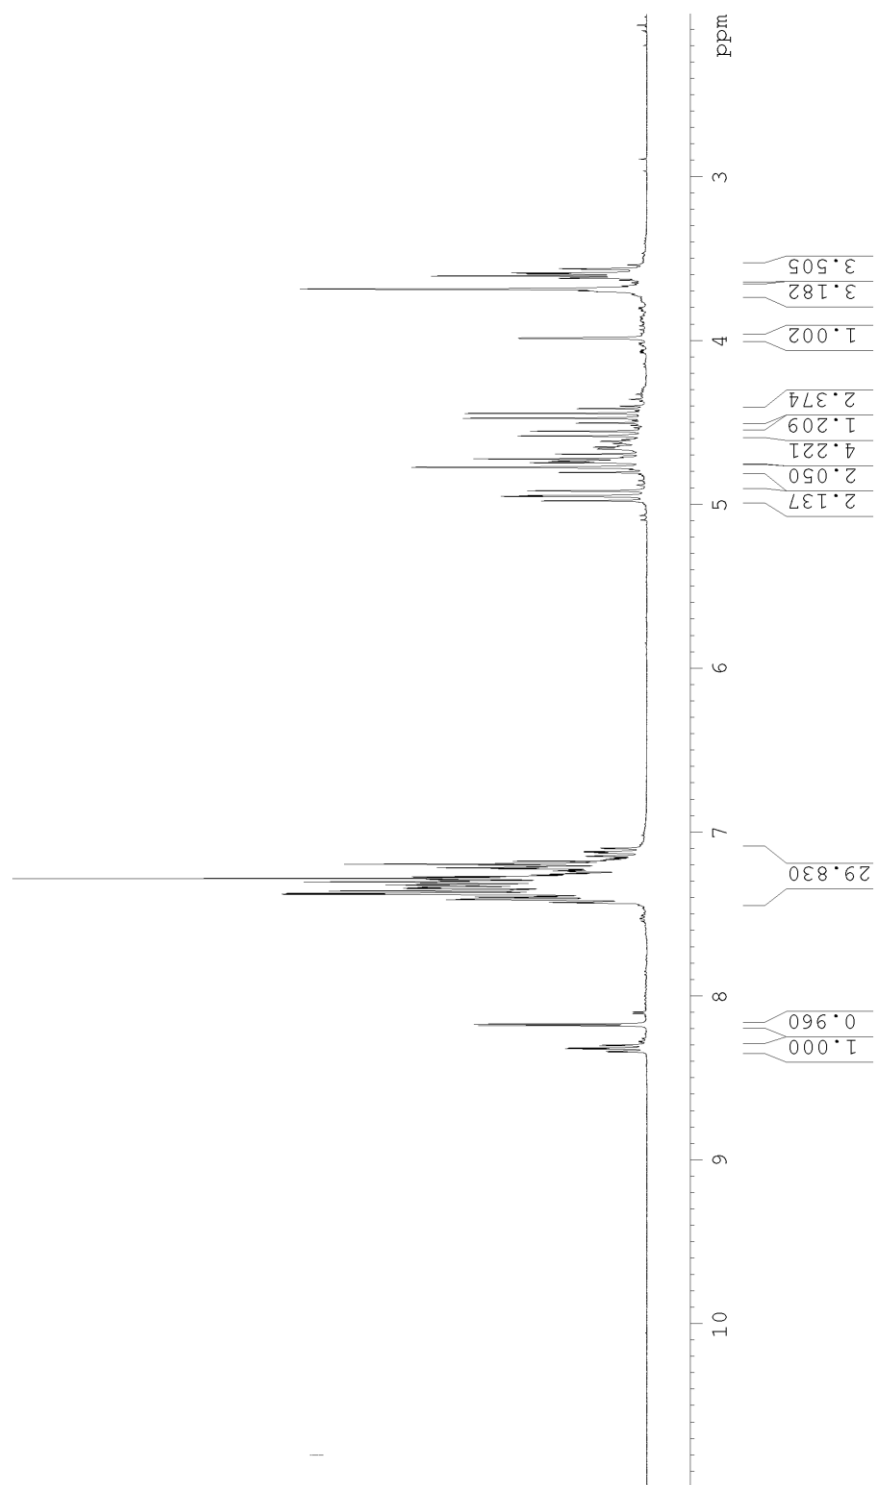

ppm



$^{13}\text{C}$ :

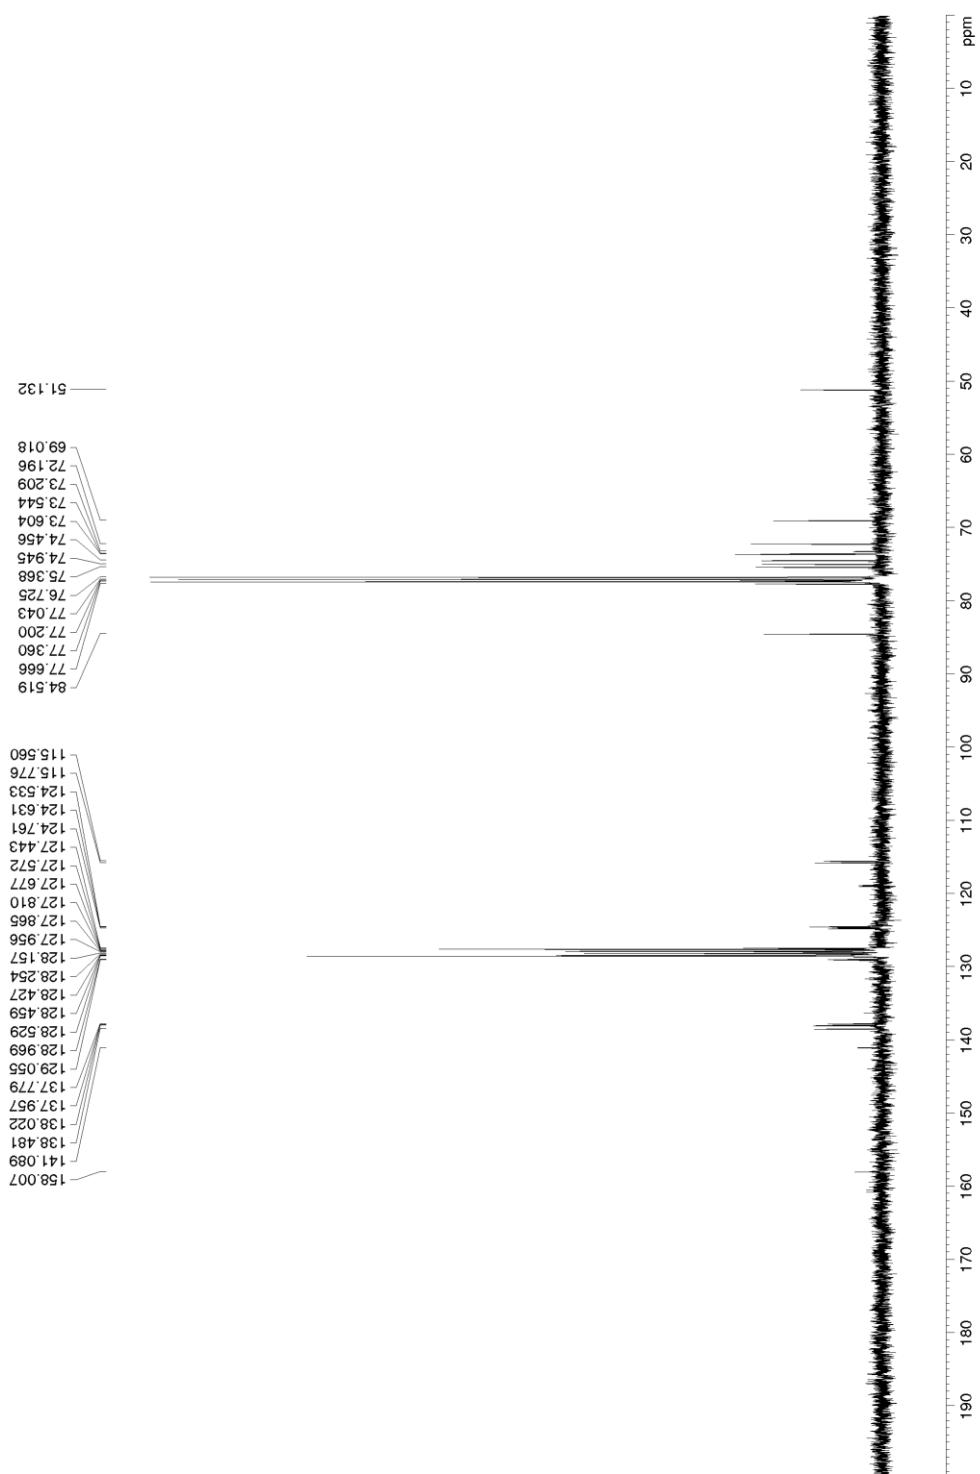

Compound **10e**:

$^1\text{H}$ :

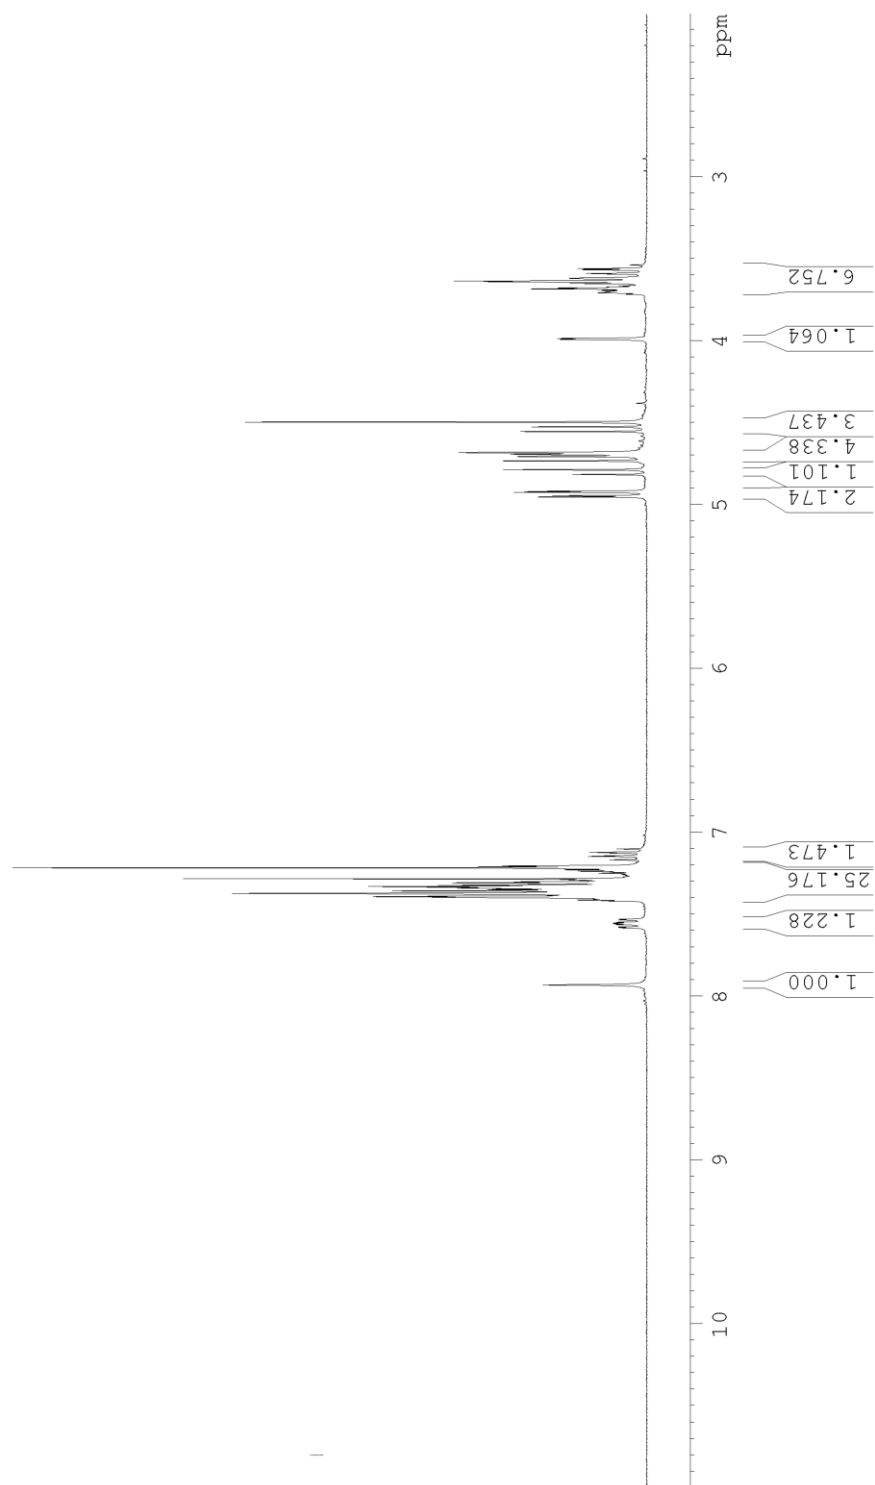

ppm

$^{13}\text{C}$ :

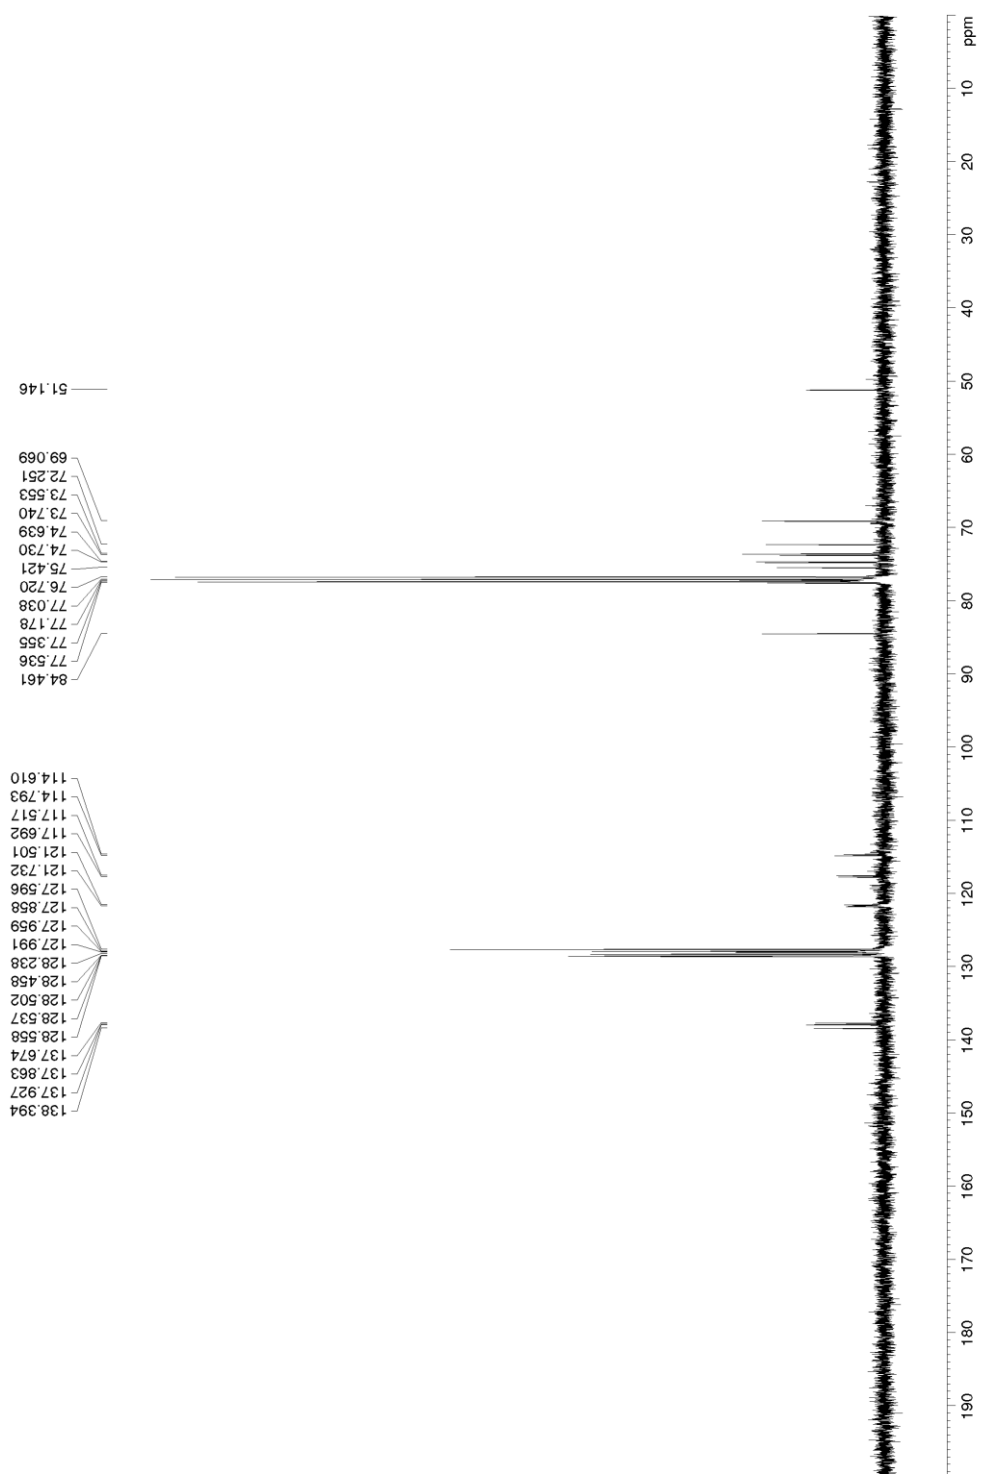

Compound **10f**:

$^1\text{H}$ :

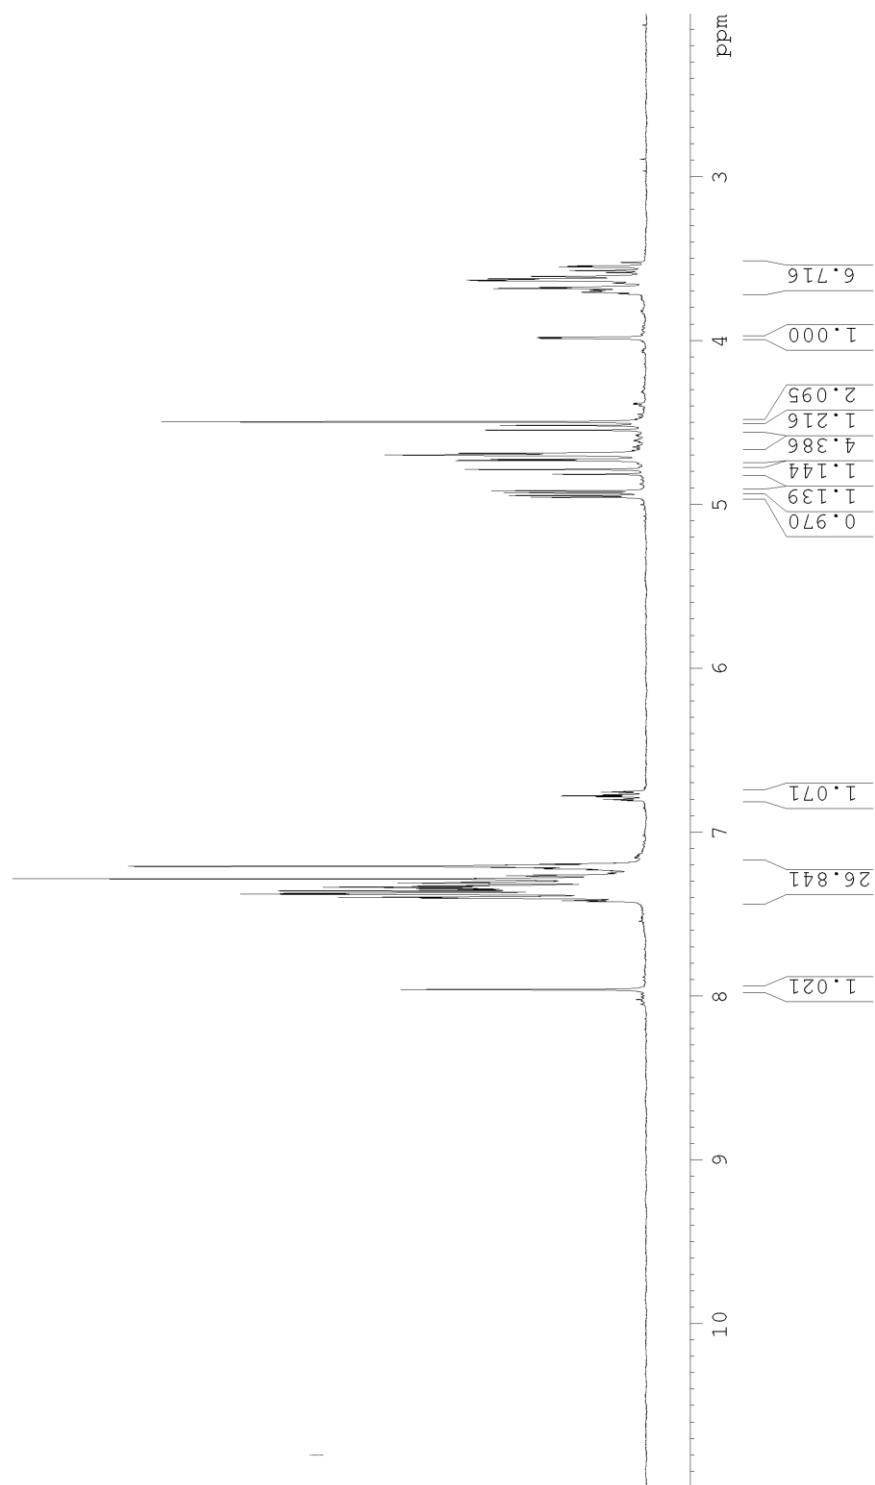

$^{13}\text{C}$ :

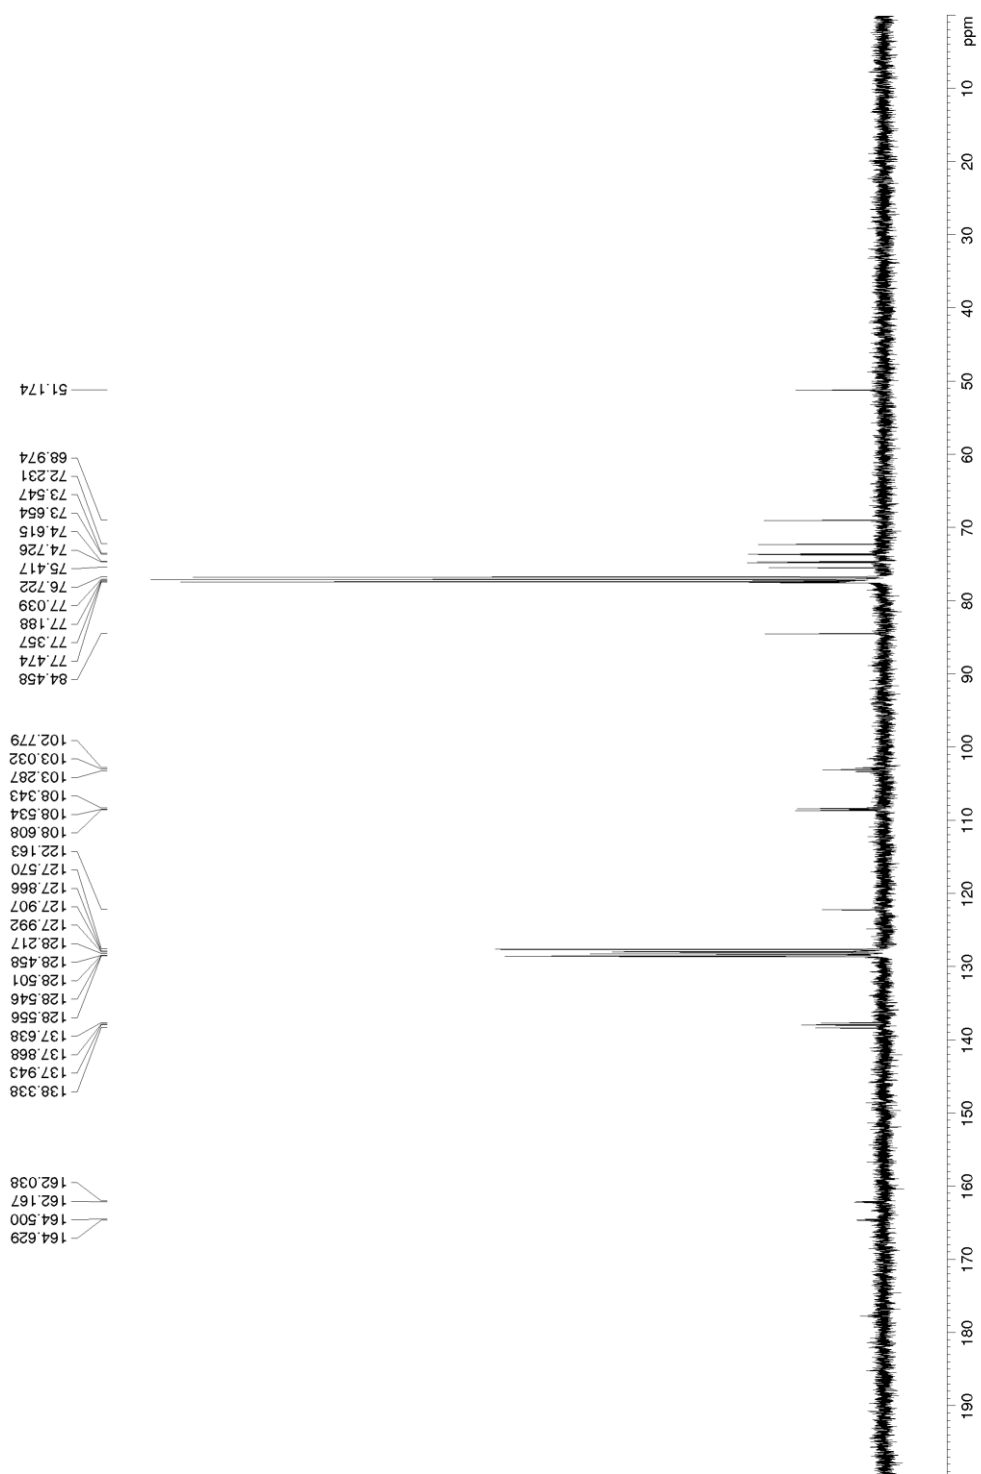

Compound **10g**:

$^1\text{H}$ :

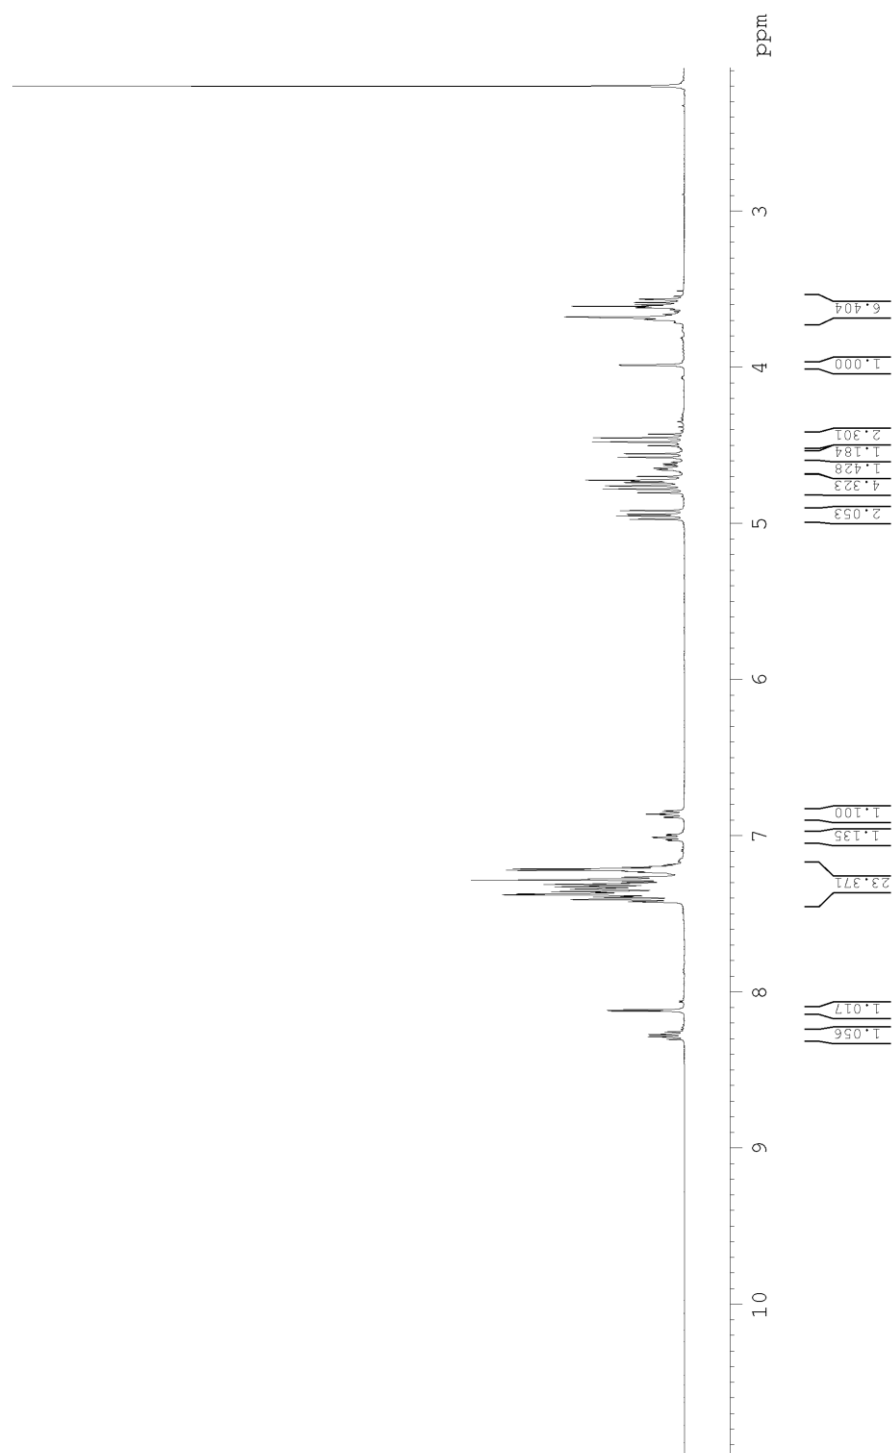

$^{13}\text{C}$ :

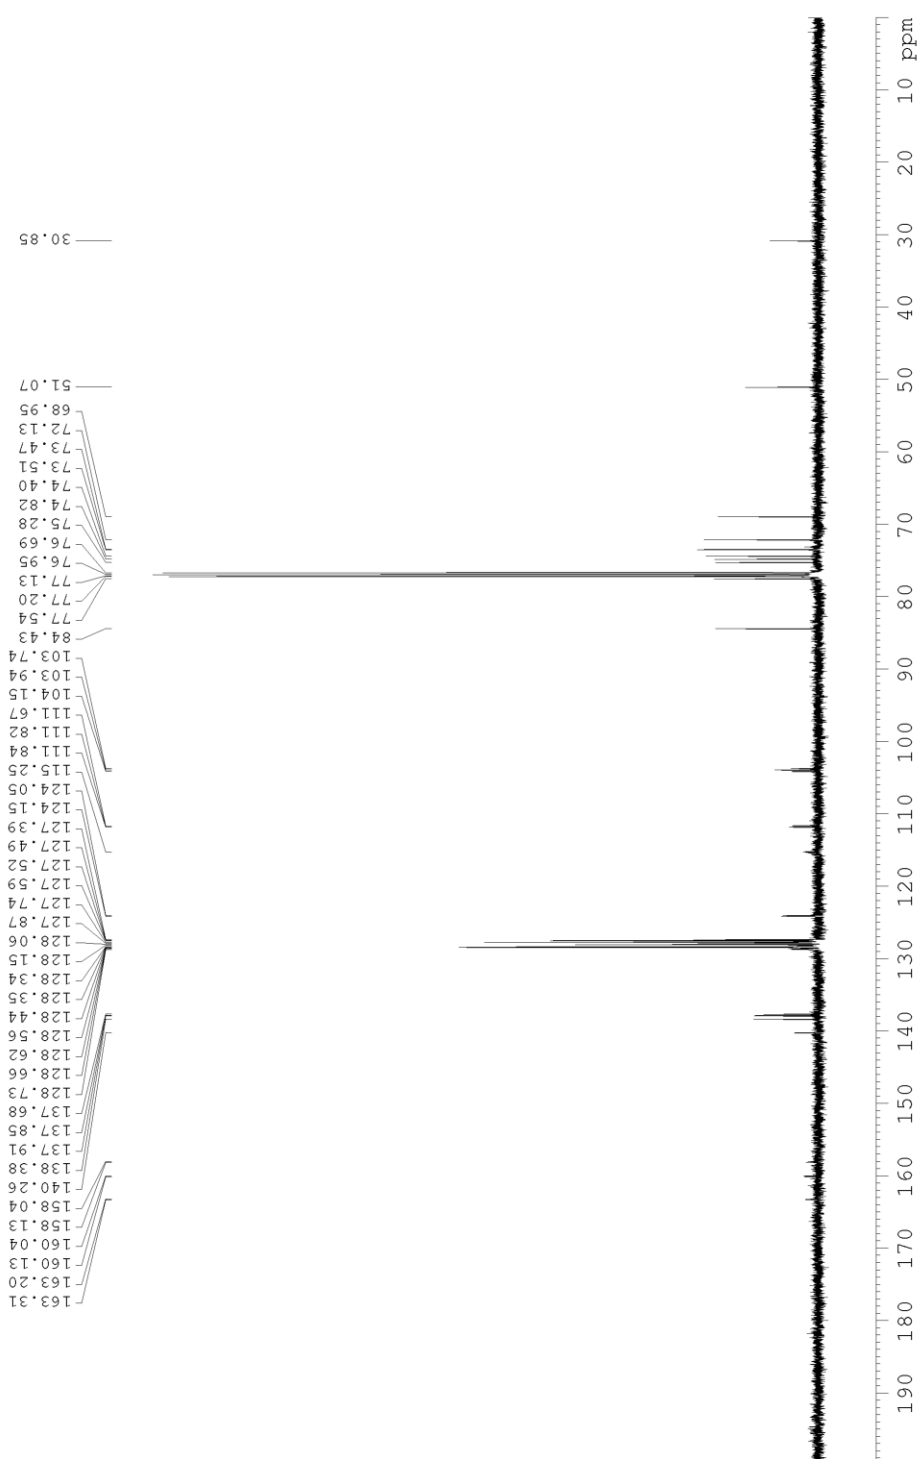

Compound **10h**:

$^1\text{H}$ :

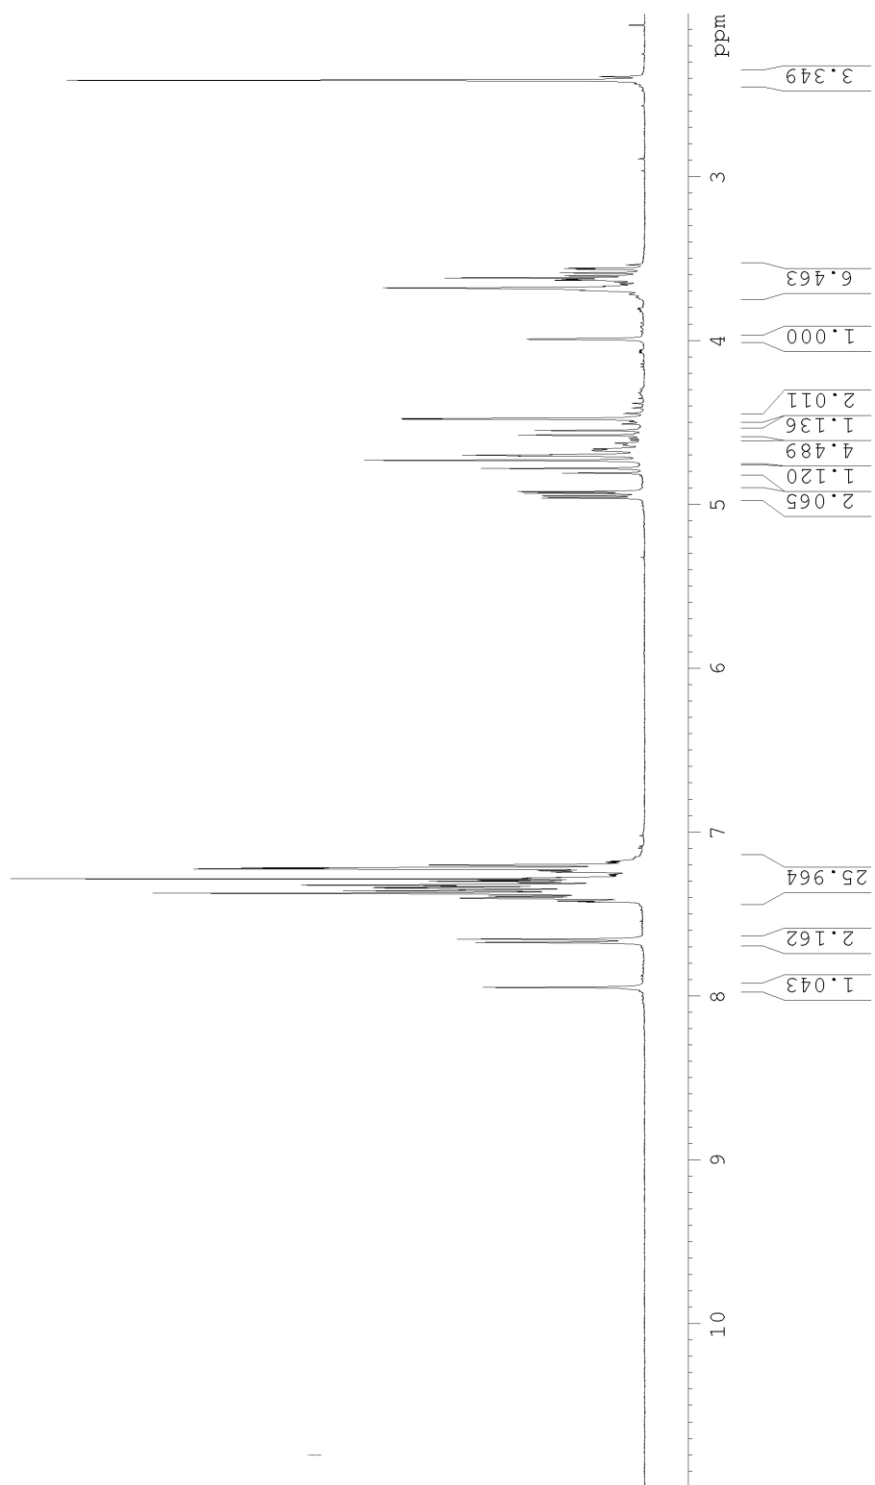

ppm



$^{13}\text{C}$ :

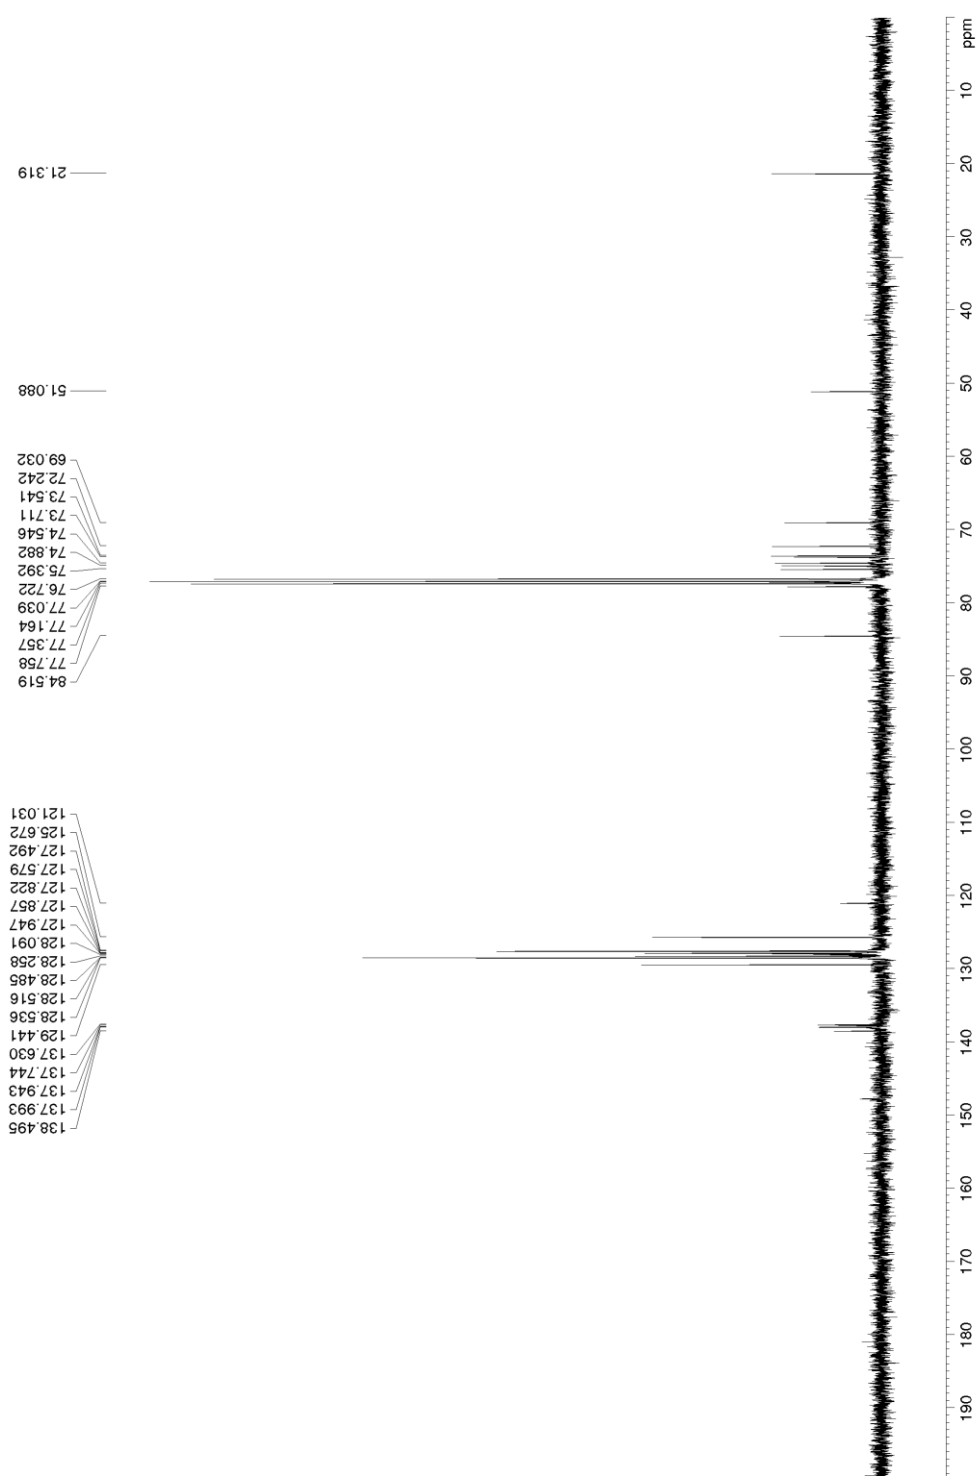

Compound **10i**:

$^1\text{H}$ :

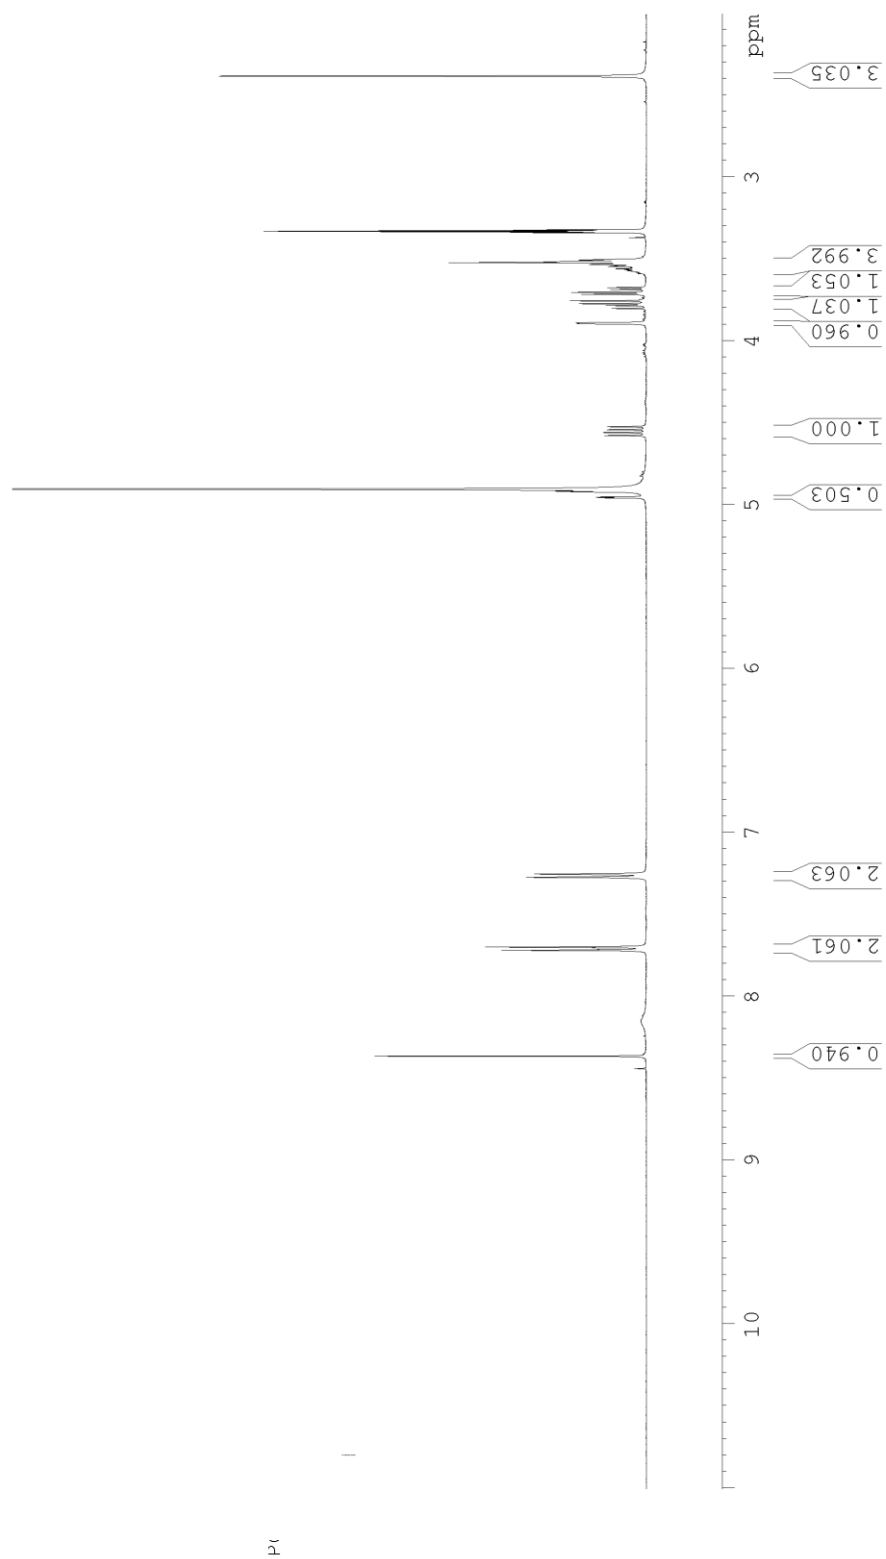

$^{13}\text{C}$ :

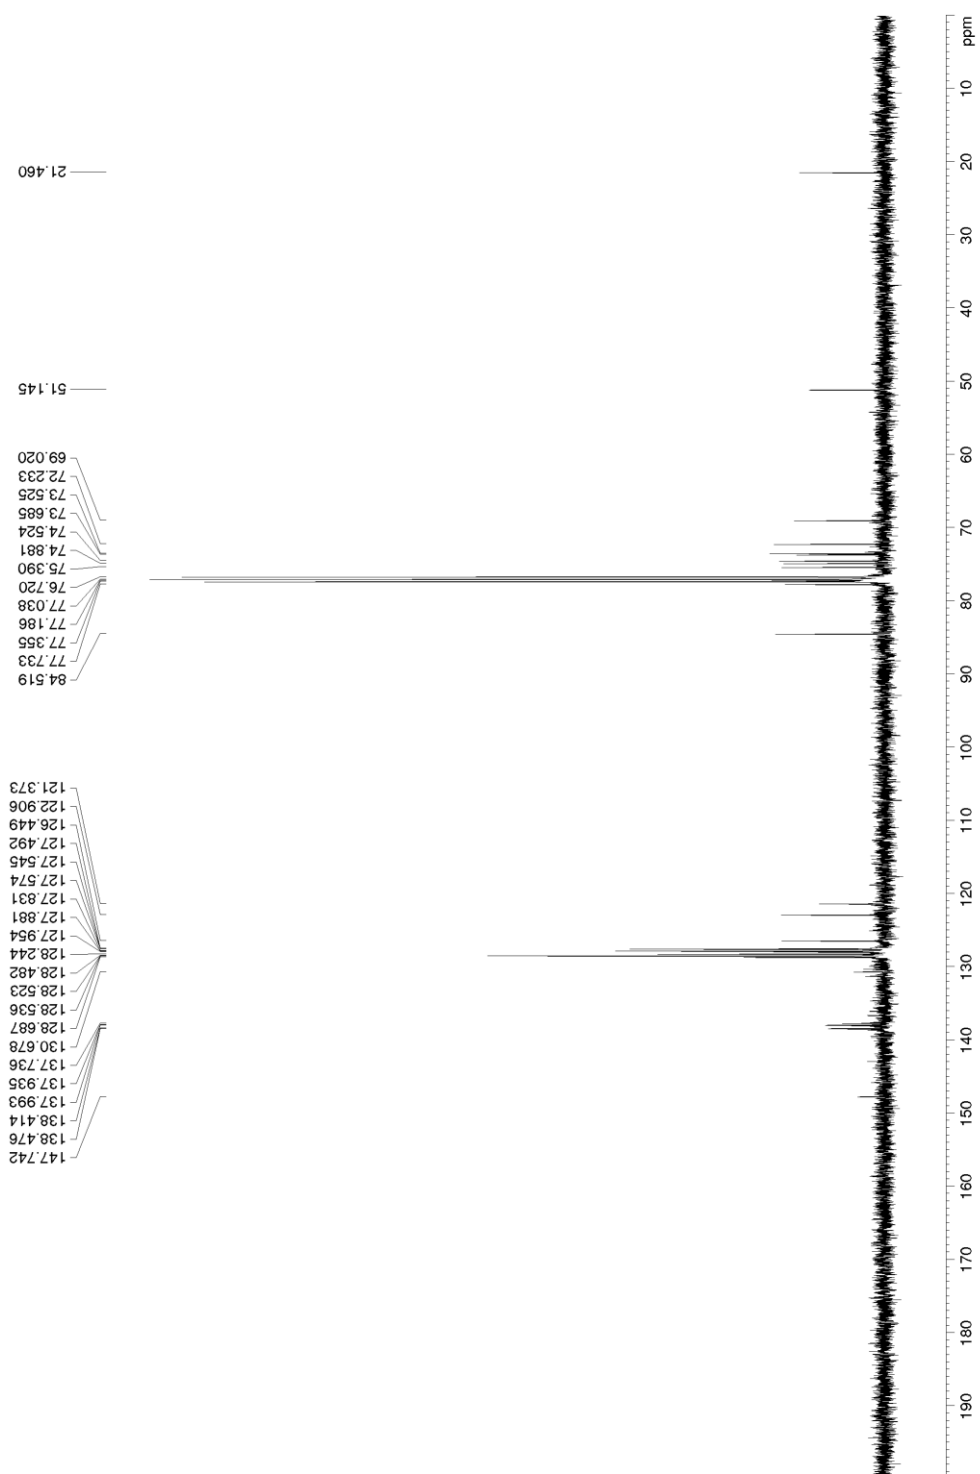

Compound **10j**:

$^1\text{H}$ :

ppm

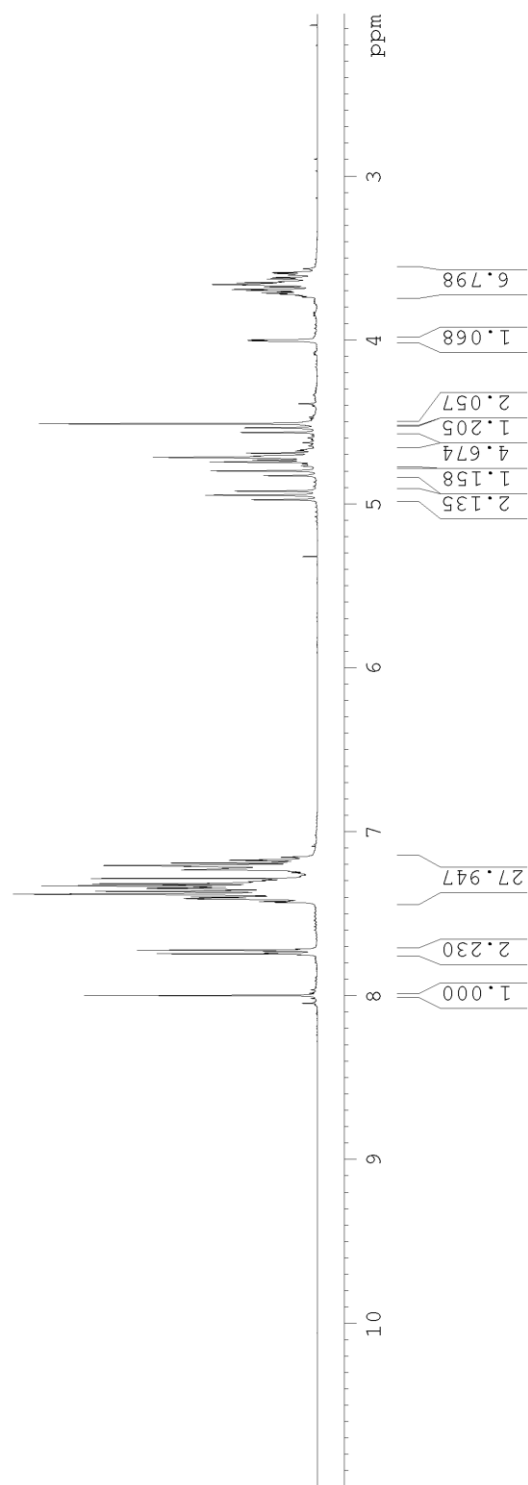

$^{13}\text{C}$ :



Compound **10k**:

$^1\text{H}$ :

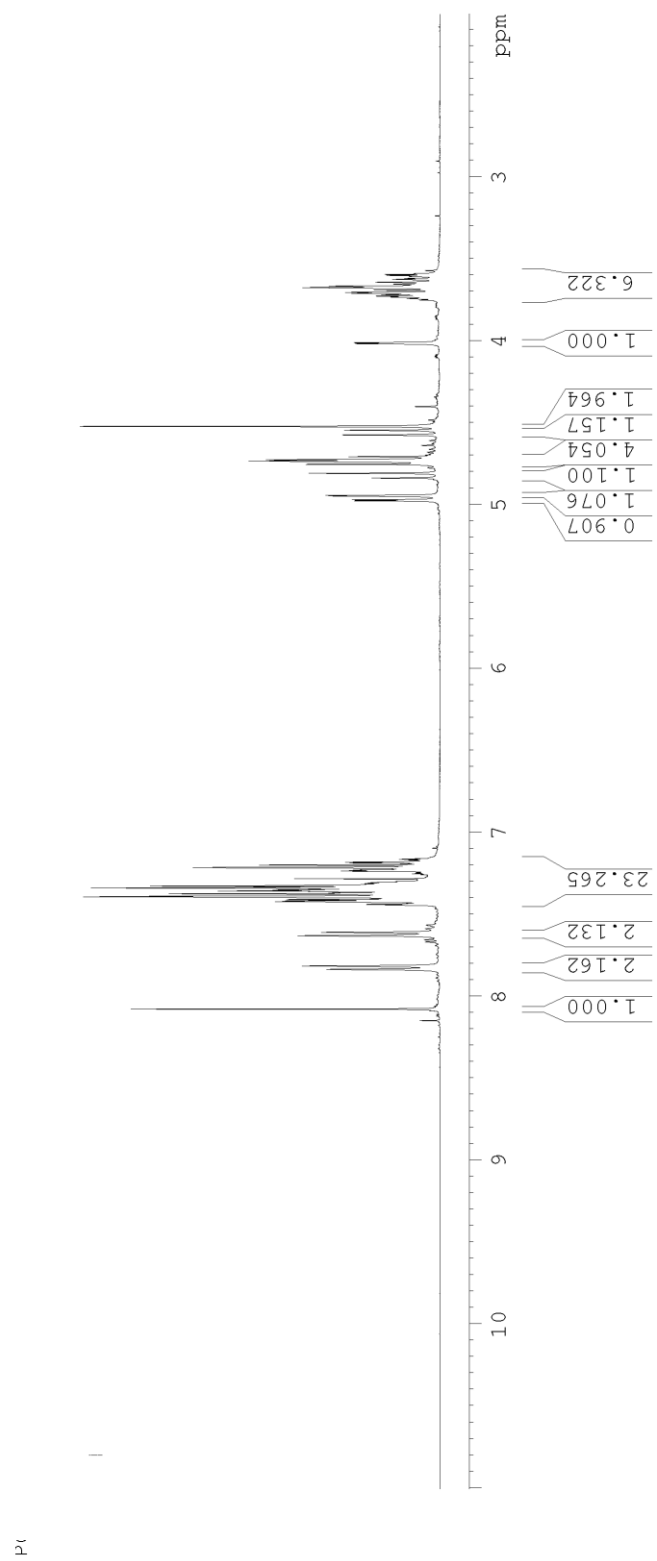

$^{13}\text{C}$ :

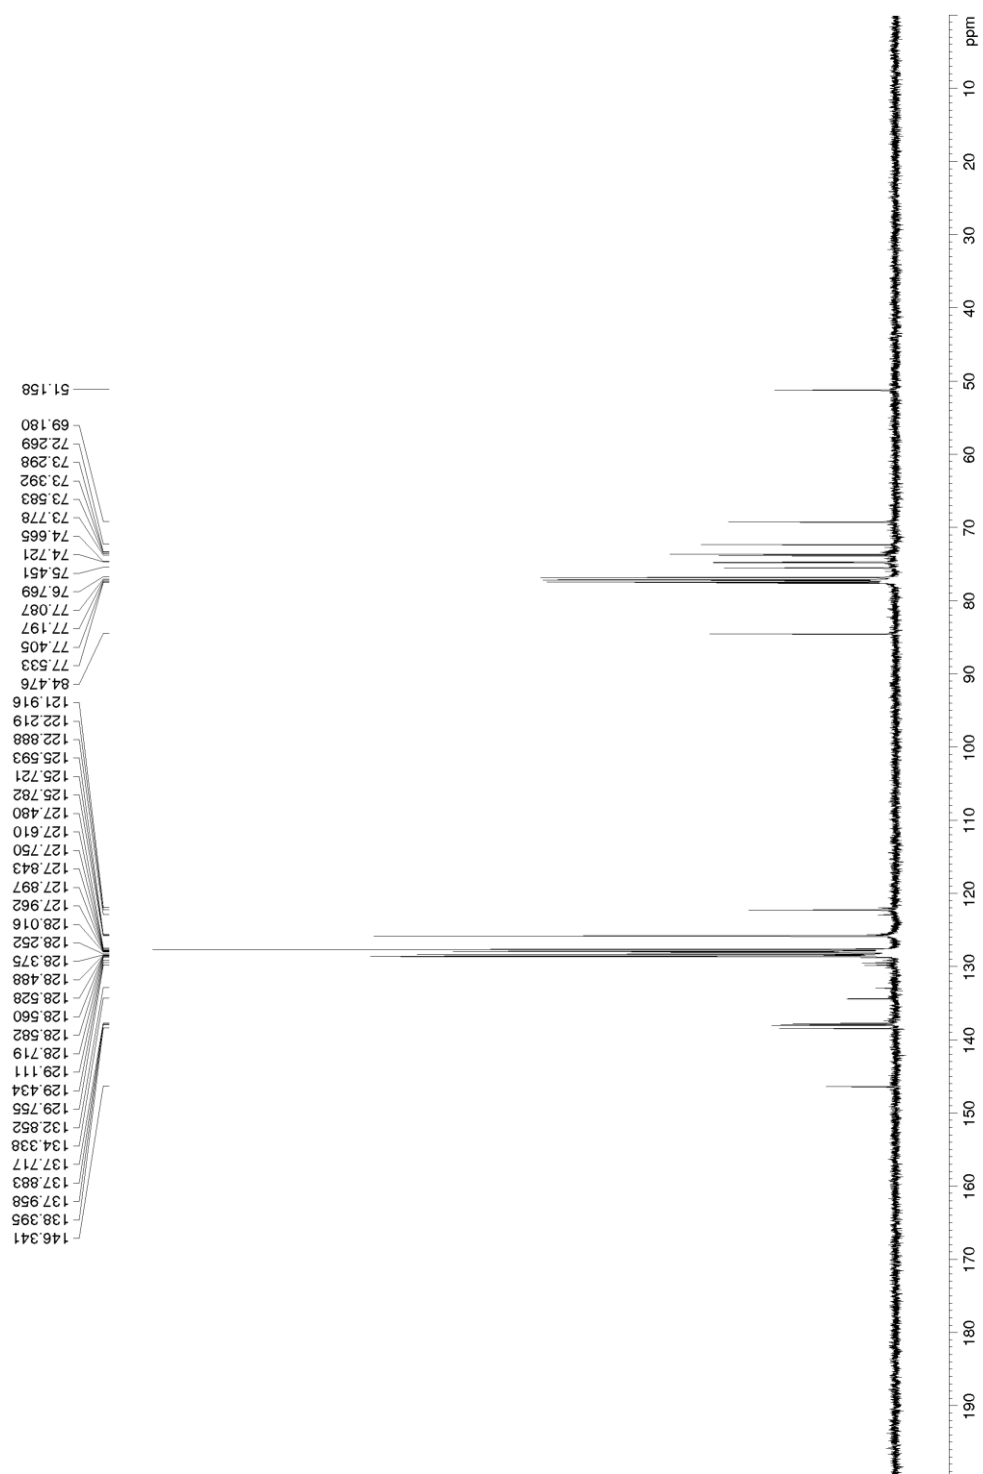

Compound **10l**:

$^1\text{H}$ :

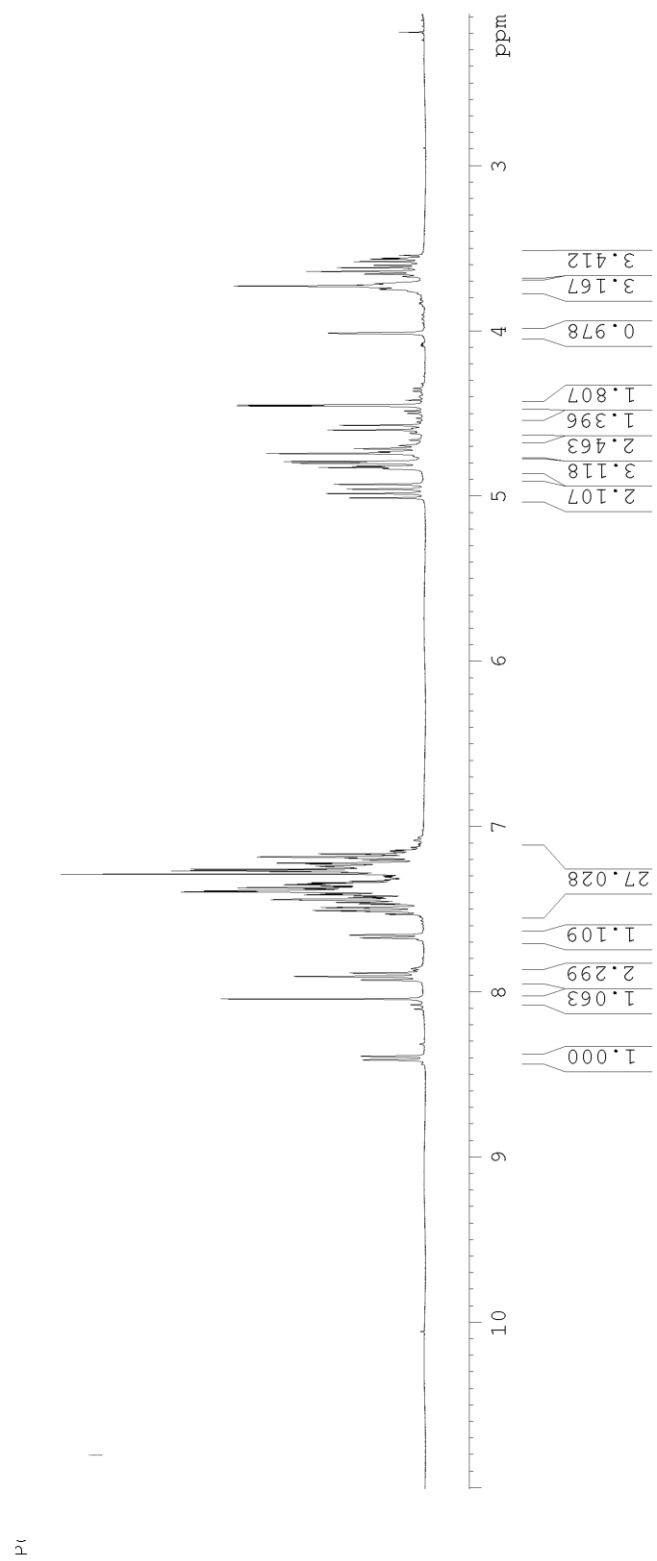



$^{13}\text{C}$ :

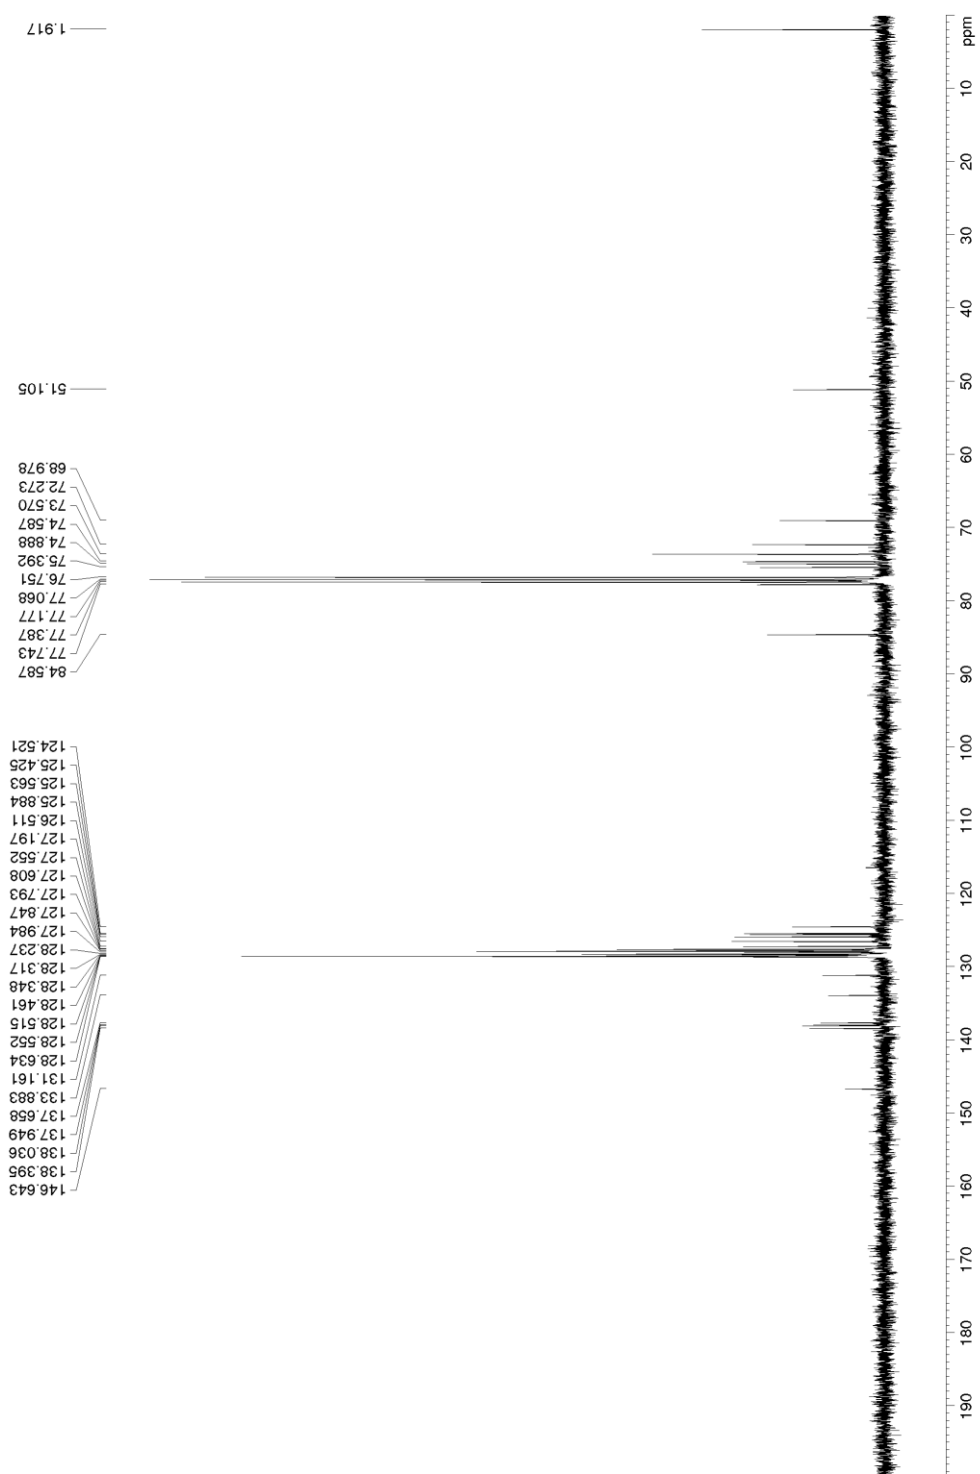

Compound **10m**:

$^1\text{H}$ :

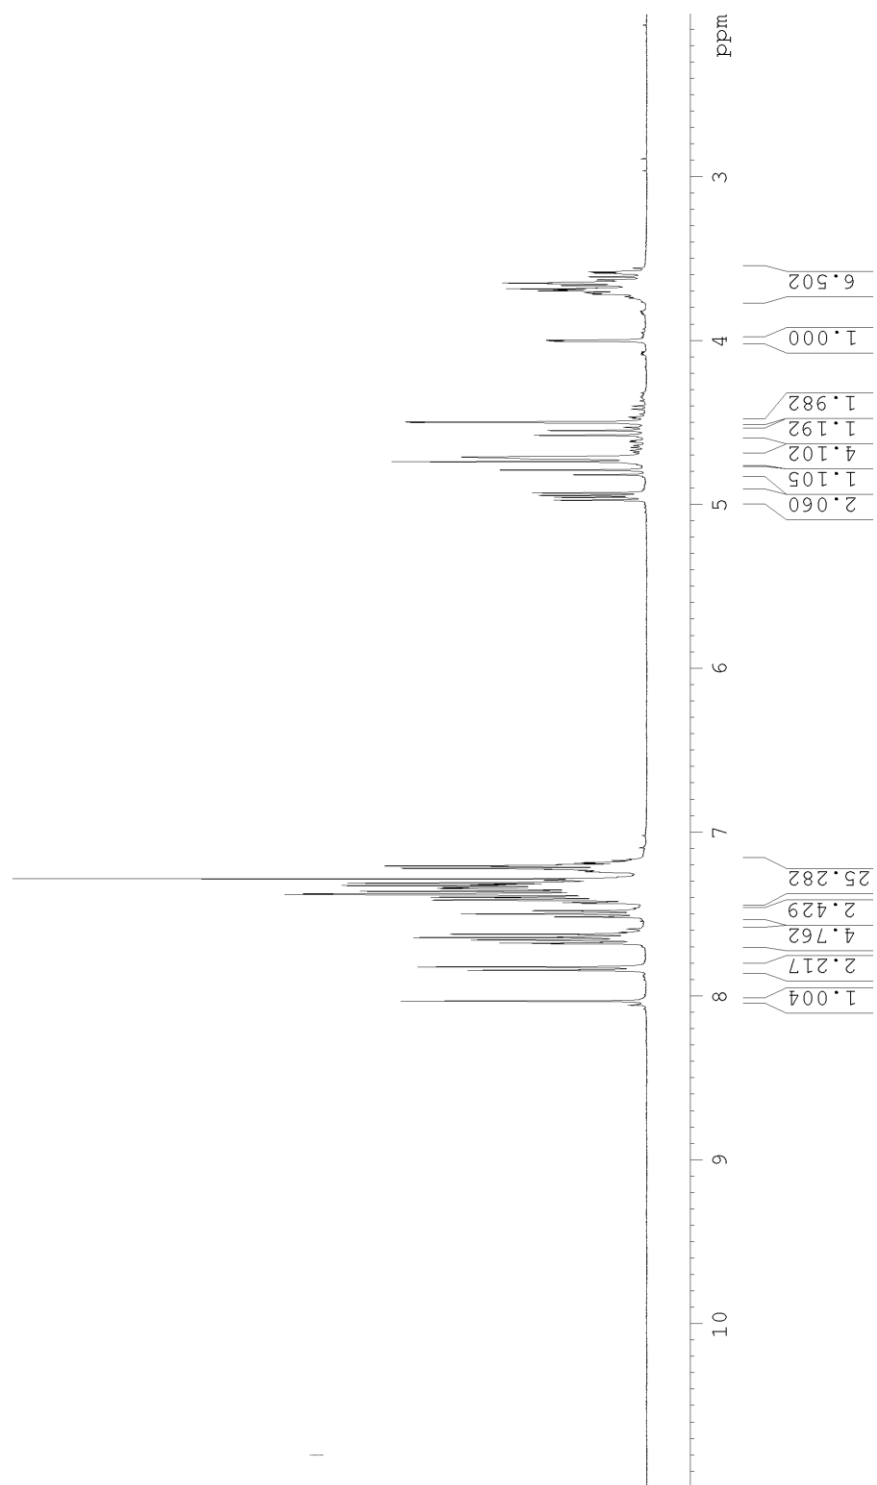

$^{13}\text{C}$ :

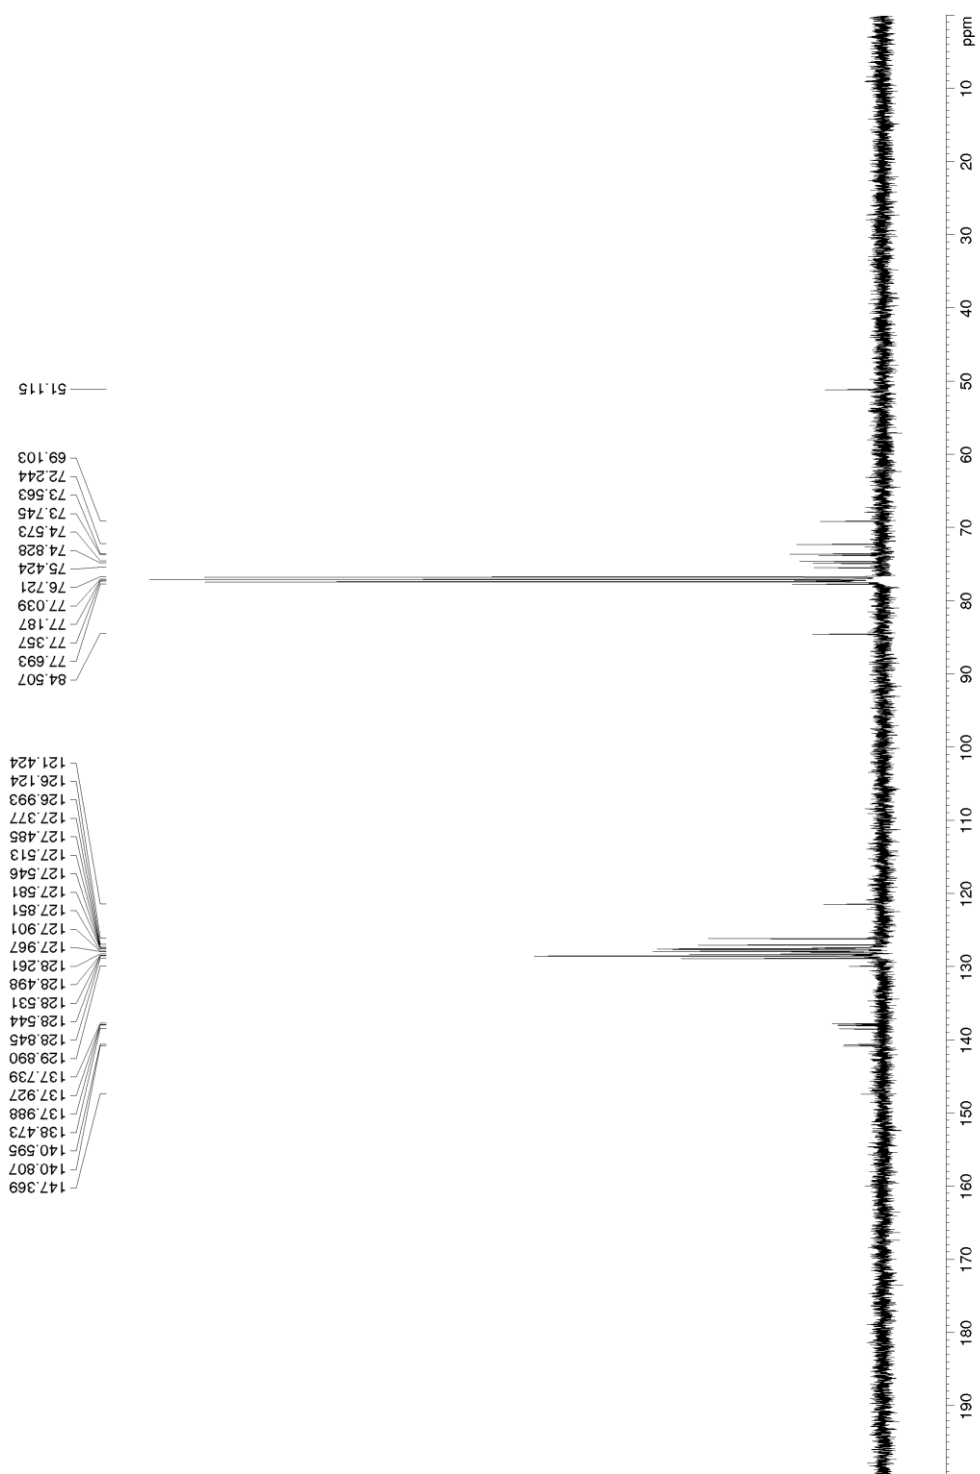

Compound **10n**:

$^1\text{H}$ :

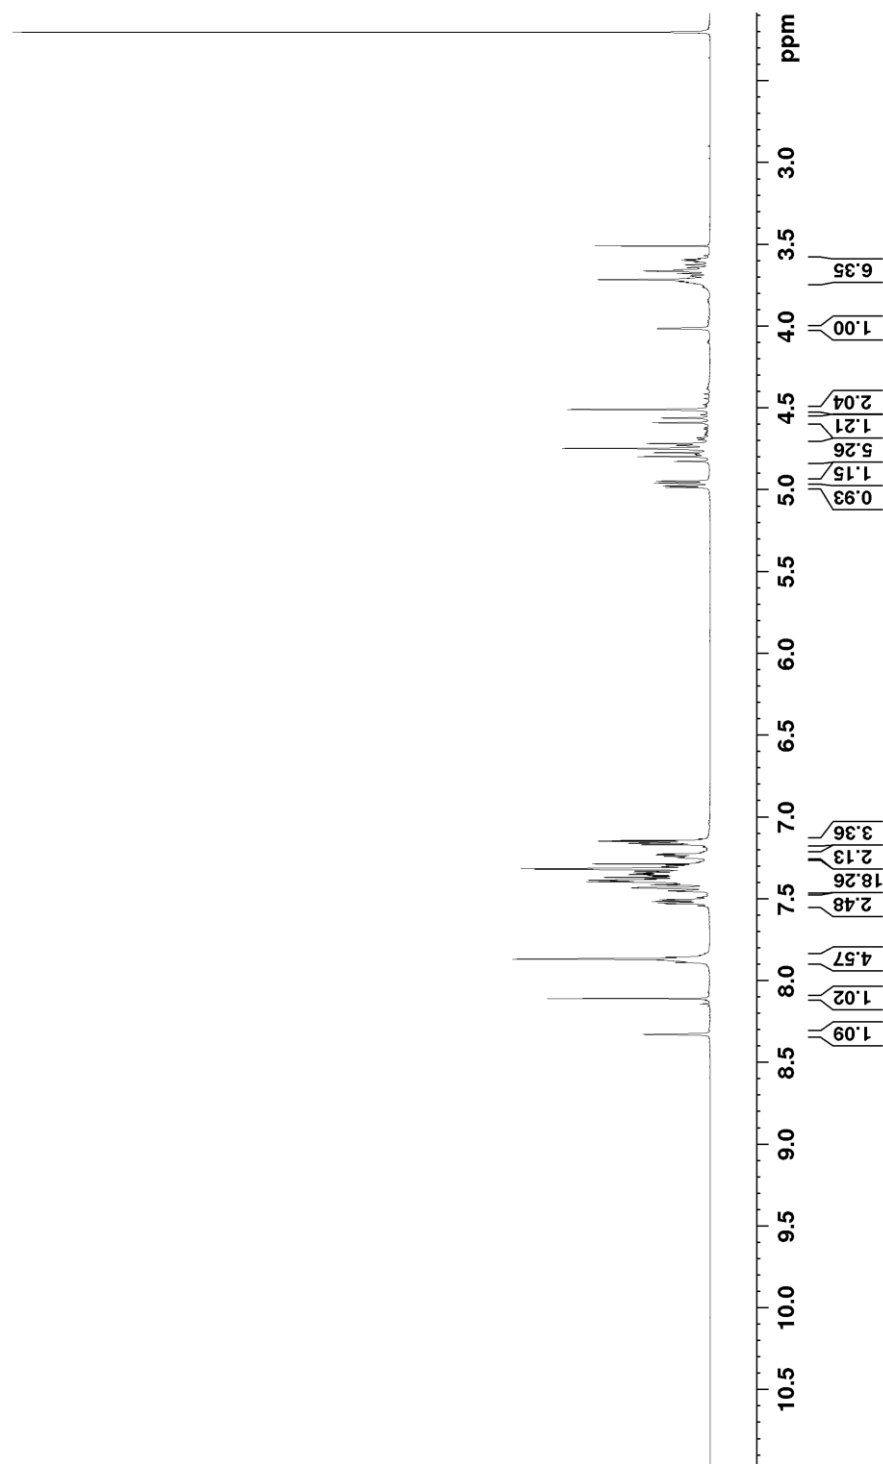

$^{13}\text{C}$ :

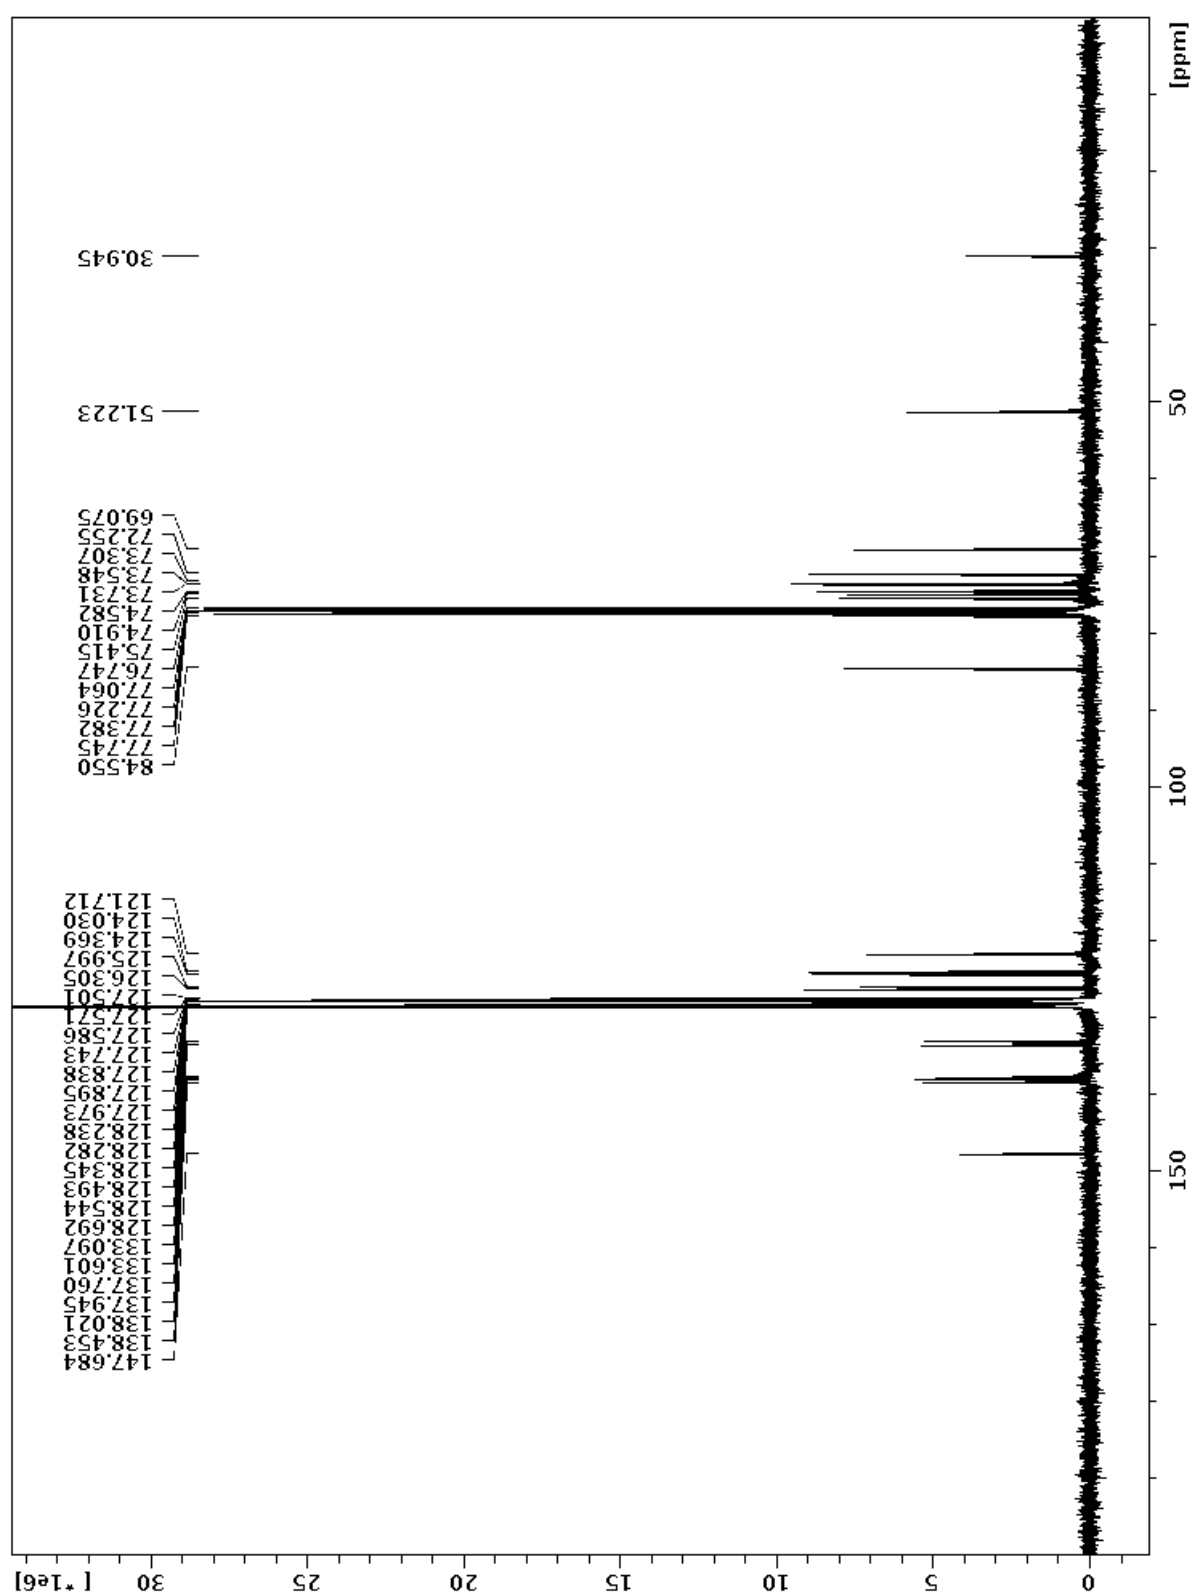

Supplement: Additional file 1 [file 1860-5397-15-102-S1.pdf]
